# Supplementary material for: Palladium-Catalyzed N-Alkenylation of N-Aryl Phosphoramidates with Alkenes
Source: MDPI journal article supplement (doi:10.3390/molecules28114466), 2023-05-31

# Palladium-Catalyzed *N*-Alkenylation of *N*-Aryl Phosphoramidates with Alkenes

Yu-An Li,<sup>1</sup> Ge Wu,<sup>3</sup> Jia Li\*<sup>2</sup>

<sup>1</sup>Department of Orthopaedics Surgery, The Second Affiliated Hospital and Yuying Children's Hospital of Wenzhou Medical University, Wenzhou, China.

<sup>2</sup>Department of Neurology, First Affiliated Hospital of Wenzhou Medical University, Wenzhou, China.

<sup>3</sup>School of Pharmaceutical Sciences, Wenzhou Medical University, Wenzhou, China.

\*E-mail: lijia@wzhospital.cn

## Table of Contents

|                                                                                          |                |
|------------------------------------------------------------------------------------------|----------------|
| <b>(1) Reaction Optimization.....</b>                                                    | <b>S2</b>      |
| <b>(2) <sup>1</sup>H, <sup>13</sup>C and <sup>19</sup>F NMR spectra of products.....</b> | <b>S3-S54</b>  |
| <b>(3) HRMS spectra of products.....</b>                                                 | <b>S55-S71</b> |

## Reaction Optimization<sup>a</sup>

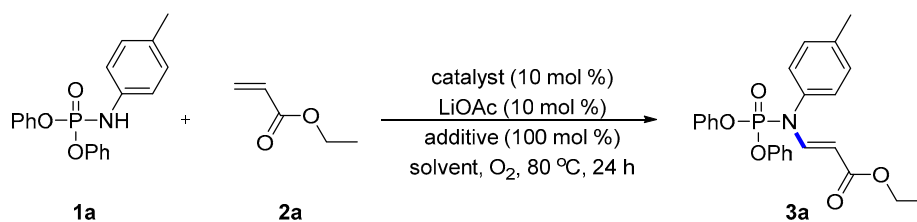

| entry           | catalyst                                            | additive             | solvent | yield (%) <sup>b</sup> |
|-----------------|-----------------------------------------------------|----------------------|---------|------------------------|
| 1               | Pd(OAc) <sub>2</sub>                                | Cu(OAc) <sub>2</sub> | DME     | 0                      |
| 2               | Pd(OAc) <sub>2</sub>                                | CuCl <sub>2</sub>    | DME     | 0                      |
| 3               | Pd(OAc) <sub>2</sub>                                | BQ                   | DME     | 0                      |
| 4               | Pd(OAc) <sub>2</sub>                                | pyridine             | DME     | 0                      |
| 5               | Pd(OAc) <sub>2</sub>                                | LiBr                 | DME     | 0                      |
| 6               | Pd(OAc) <sub>2</sub>                                | TBAF                 | DME     | 0                      |
| 7               | Pd(OAc) <sub>2</sub>                                | TBAC                 | DME     | 0                      |
| 8               | Pd(OAc) <sub>2</sub>                                | TBAB                 | DME     | 65                     |
| 9               | Pd(OAc) <sub>2</sub>                                | TBAI                 | DME     | 0                      |
| 10              | PdCl <sub>2</sub>                                   | TBAB                 | DME     | 0                      |
| 11              | Pd(CH <sub>3</sub> CN) <sub>2</sub> Cl <sub>2</sub> | TBAB                 | DME     | 0                      |
| 12              | Pd(PhCN) <sub>2</sub> Cl <sub>2</sub>               | TBAB                 | DME     | 0                      |
| 13              | Pd(acac) <sub>2</sub>                               | TBAB                 | DME     | 0                      |
| 14              | Pd(OAc) <sub>2</sub>                                | TBAB                 | THF     | 45                     |
| 15              | Pd(OAc) <sub>2</sub>                                | TBAB                 | Dioxane | 33                     |
| 16              | Pd(OAc) <sub>2</sub>                                | TBAB                 | toluene | 21                     |
| 17              | Pd(OAc) <sub>2</sub>                                | TBAB                 | DMSO    | 0                      |
| 18              | Pd(OAc) <sub>2</sub>                                | TBAB                 | DMF     | 0                      |
| 19              | Pd(OAc) <sub>2</sub>                                | TBAB                 | TMBE    | 80                     |
| 20              | Pd(TFA) <sub>2</sub>                                | TBAB                 | TMBE    | 89                     |
| 21 <sup>c</sup> | Pd(TFA) <sub>2</sub>                                | TBAB                 | TMBE    | 7                      |
| 22 <sup>d</sup> | Pd(TFA) <sub>2</sub>                                | TBAB                 | TMBE    | 29                     |
| 23 <sup>e</sup> | Pd(TFA) <sub>2</sub>                                | TBAB                 | TMBE    | 77                     |
| 24 <sup>f</sup> | Pd(TFA) <sub>2</sub>                                | TBAB                 | TMBE    | 72                     |
| 25 <sup>g</sup> | Pd(TFA) <sub>2</sub>                                | TBAB                 | TMBE    | 71                     |
| 26              |                                                     | TBAB                 | TMBE    | 0                      |

<sup>a</sup> Reaction conditions: **1a** (0.2 mmol), **2a** (0.6 mmol), catalyst (0.02 mmol), LiOAc (0.02 mmol), additive (0.2 mmol), solvent (2 ml), under O<sub>2</sub>, heated at 80 °C for 24 h. <sup>b</sup> Isolated yield. <sup>c</sup> Under N<sub>2</sub> atmosphere. <sup>d</sup> Under air atmosphere. <sup>e</sup> at 70 °C. <sup>f</sup> at 90 °C. <sup>g</sup> 80% TBAB.

### Invalid substrate

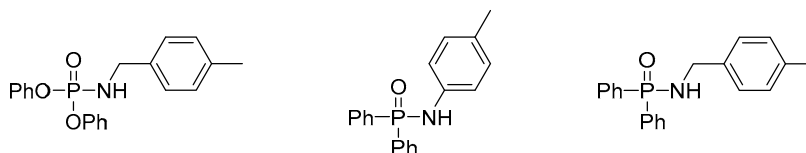

# $^1\text{H}$ , $^{13}\text{C}$ , $^{31}\text{P}$ and $^{19}\text{F}$ NMR spectra of products

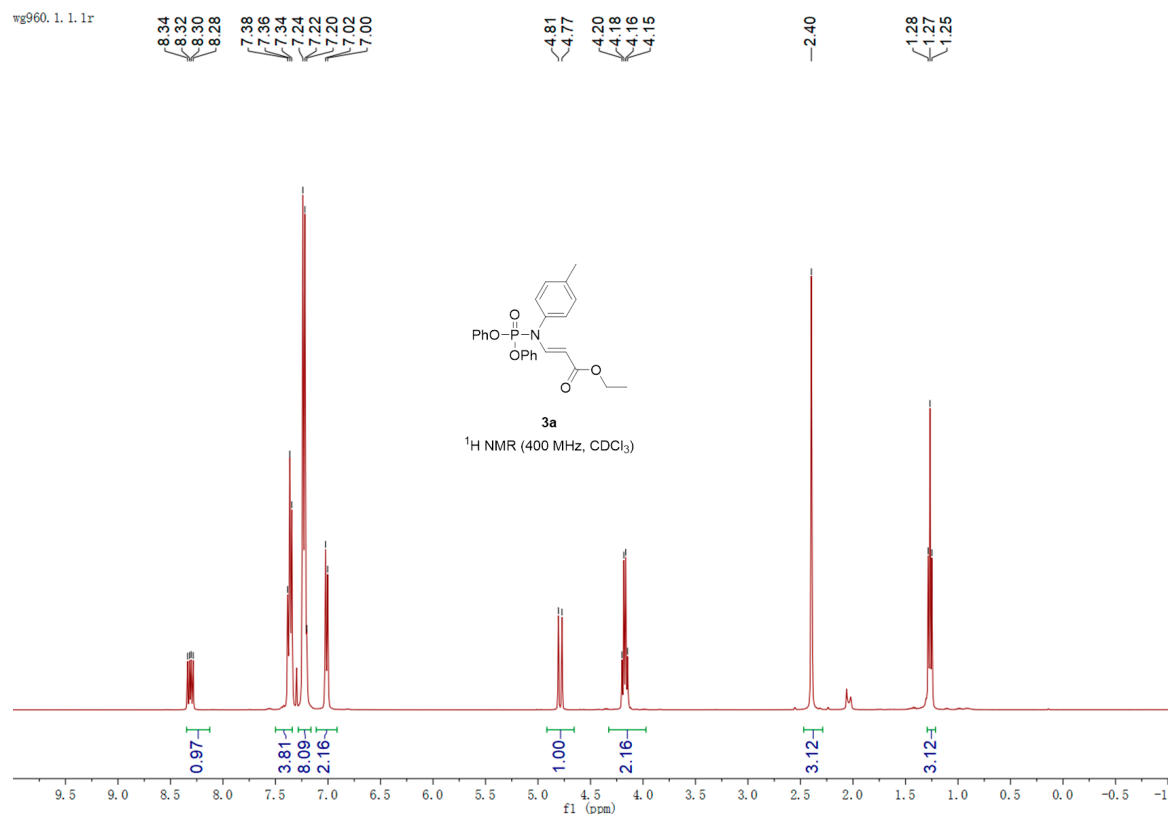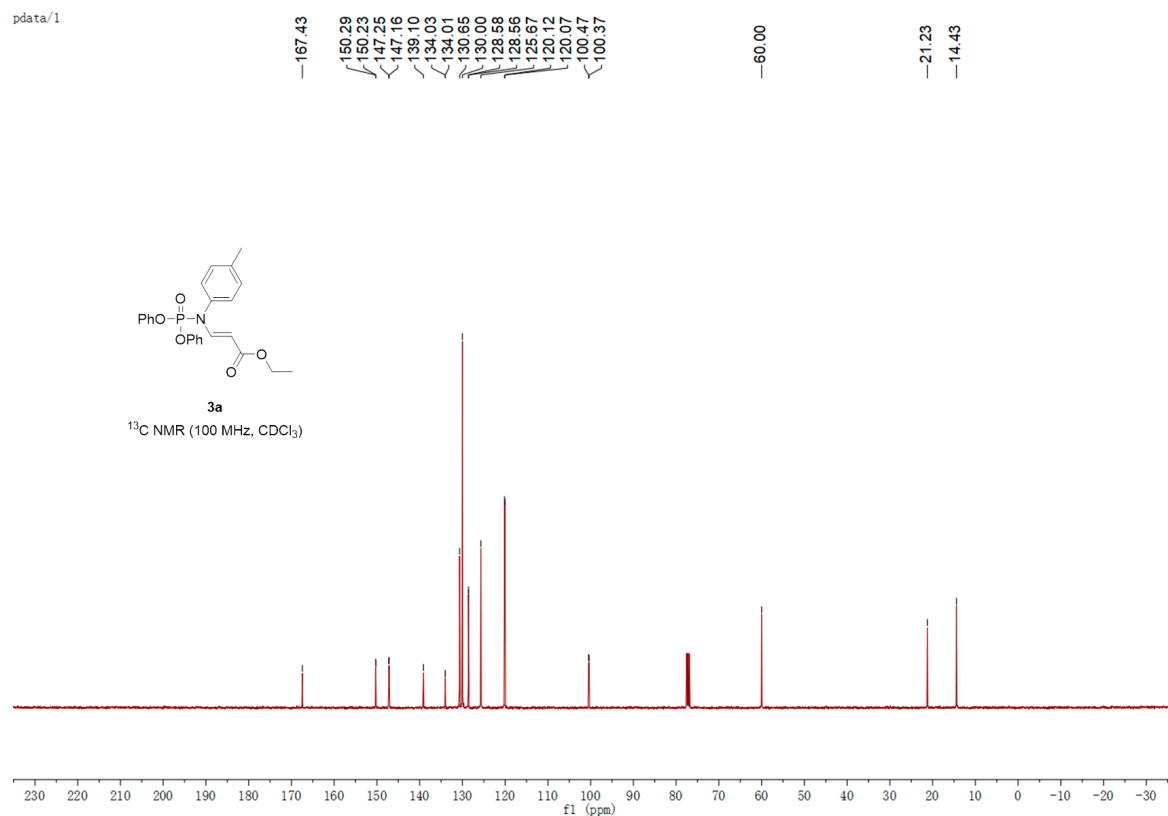

pdata/1

9.54

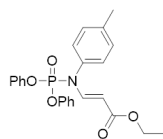

**3a**

$^{31}\text{P}$  NMR (162 MHz,  $\text{CDCl}_3$ )

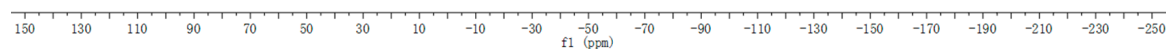

mg952.1.1.1r

8.23  
8.21  
8.19  
8.17  
7.31  
7.29  
7.27  
7.16  
7.14  
7.12  
6.86  
6.83  
6.86  
6.84

4.70  
4.70  
4.67  
4.66  
4.11  
4.10  
4.08  
4.06  
3.76

1.20  
1.19  
1.17

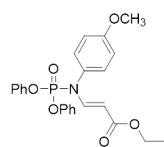

**3b**

$^1\text{H}$  NMR (400 MHz,  $\text{CDCl}_3$ )

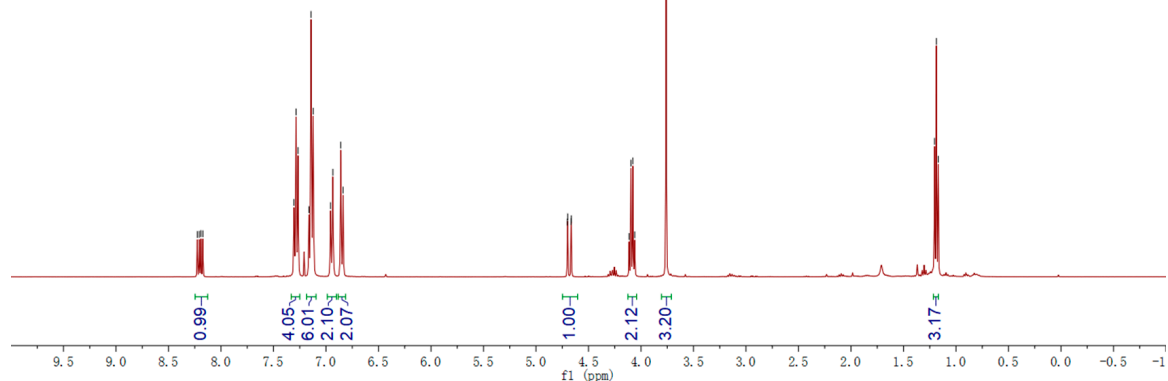



pdata/1

—167.45  
—159.81  
150.29  
150.22  
147.48  
147.38  
130.00  
129.86  
129.83  
129.06  
129.03  
125.67  
120.10  
120.05  
115.17  
100.42  
100.32

—60.02  
—55.56

—14.42

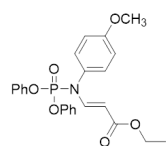

**3b**

<sup>13</sup>C NMR (100 MHz, CDCl<sub>3</sub>)

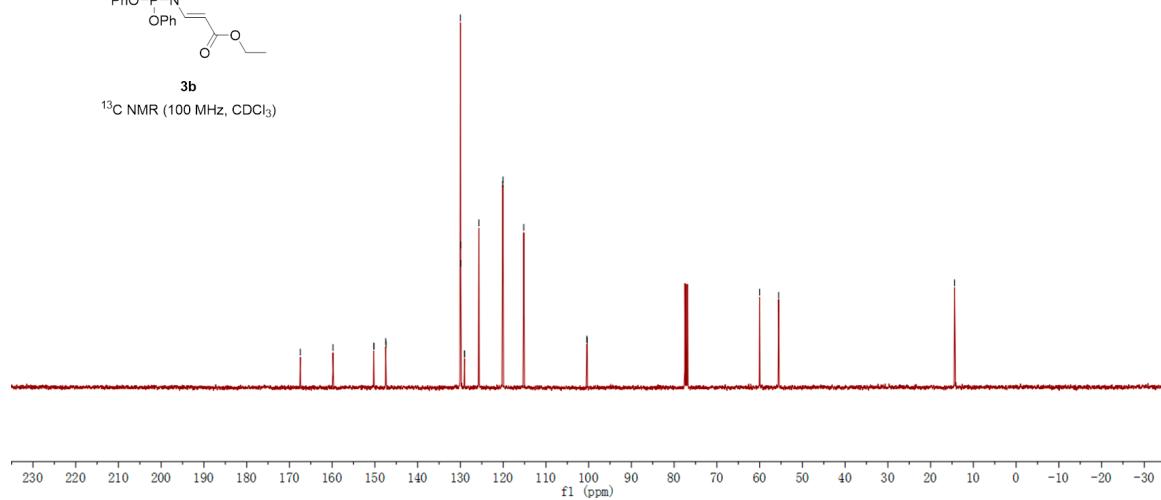

pdata/1

—9.47

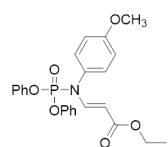

**3b**

<sup>31</sup>P NMR (162 MHz, CDCl<sub>3</sub>)

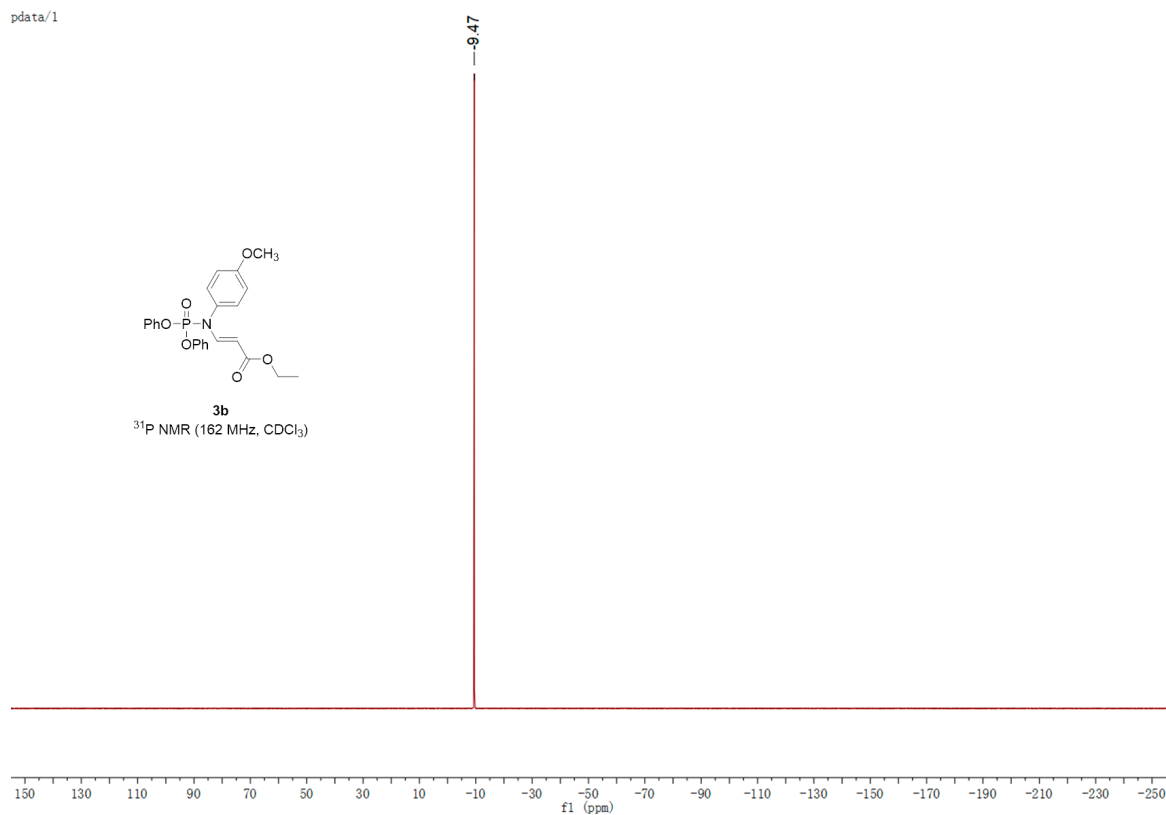



pdata/1

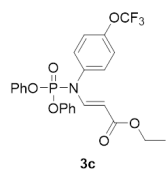

**3c**  
<sup>19</sup>F NMR (375 MHz, CDCl<sub>3</sub>)

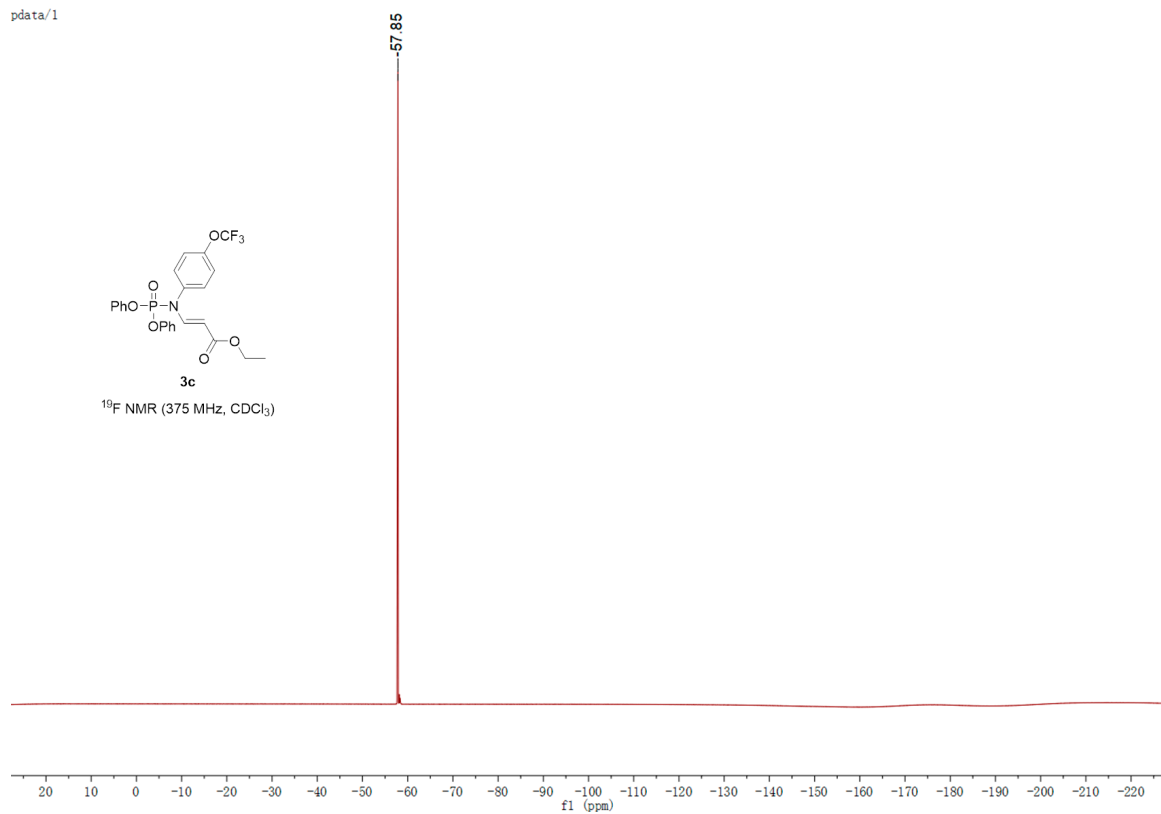

pdata/1

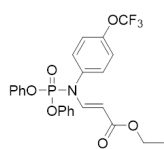

**3c**  
<sup>31</sup>P NMR (162 MHz, CDCl<sub>3</sub>)

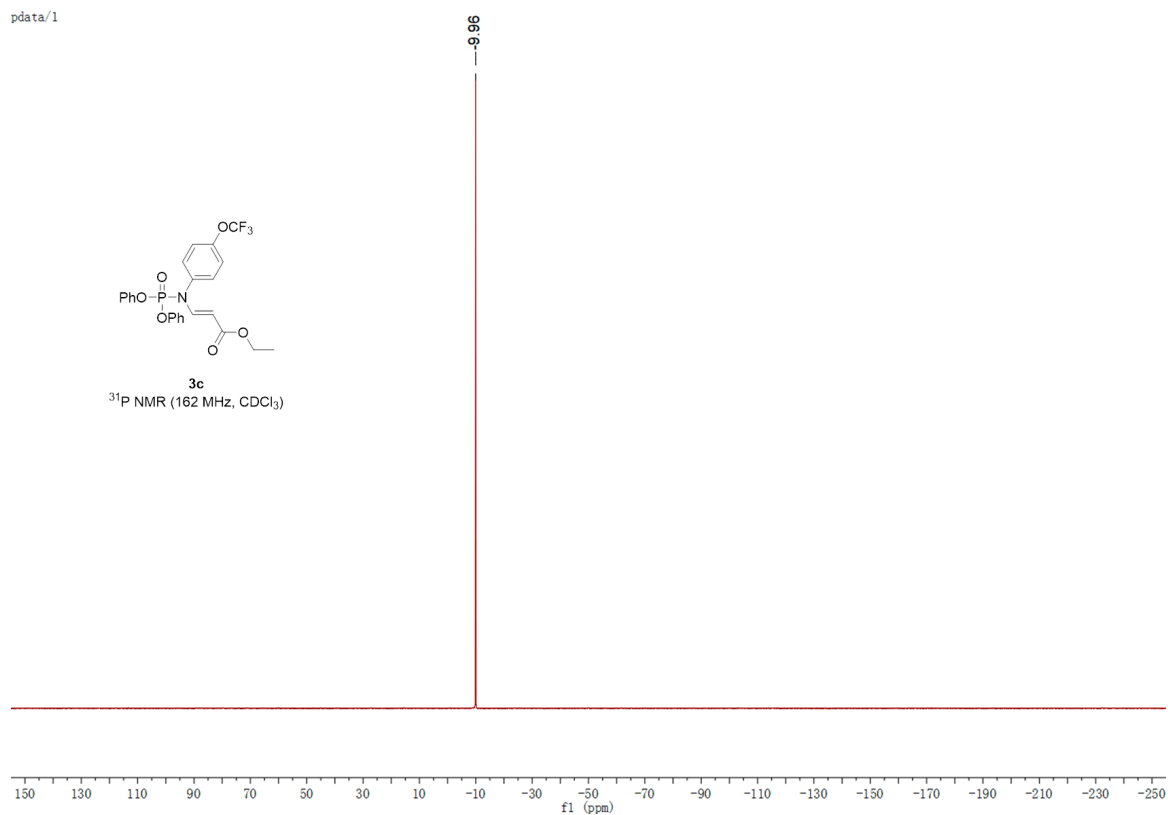

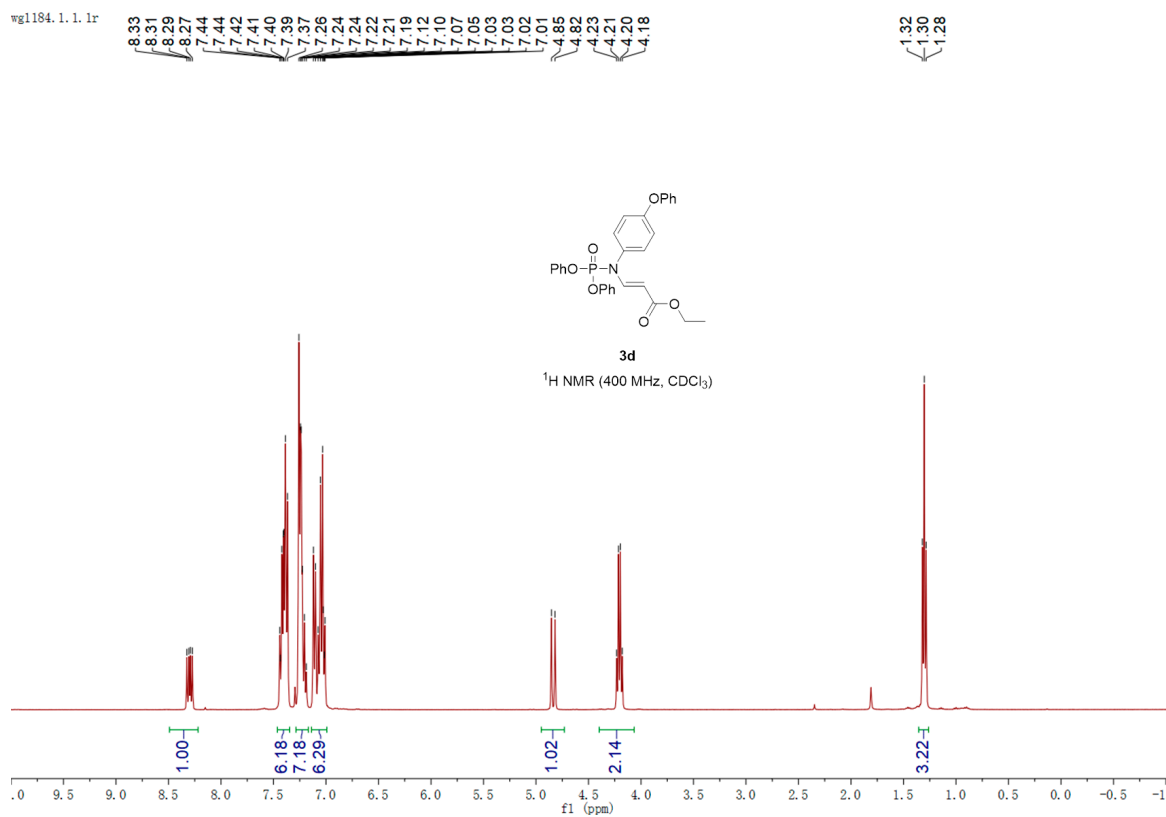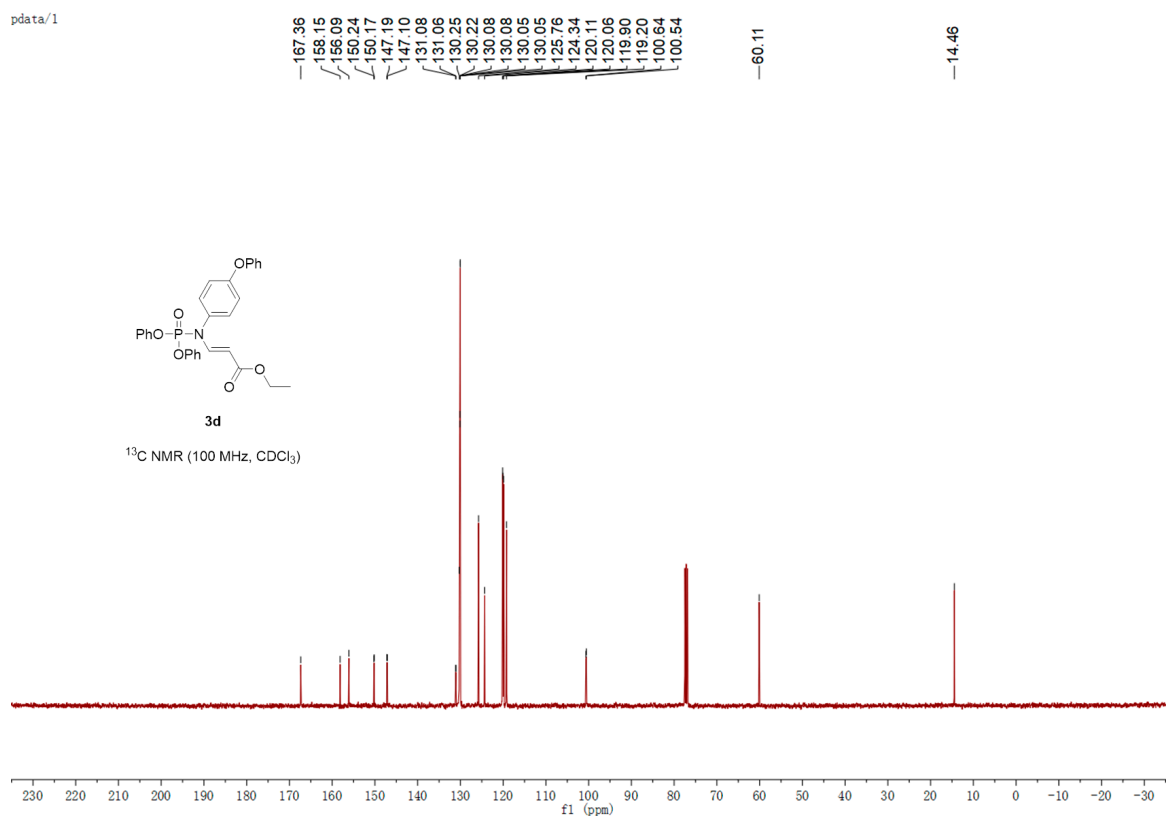

pdata/1

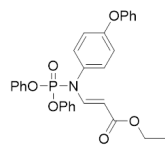

**3d**  
 $^{31}\text{P}$  NMR (162 MHz,  $\text{CDCl}_3$ )

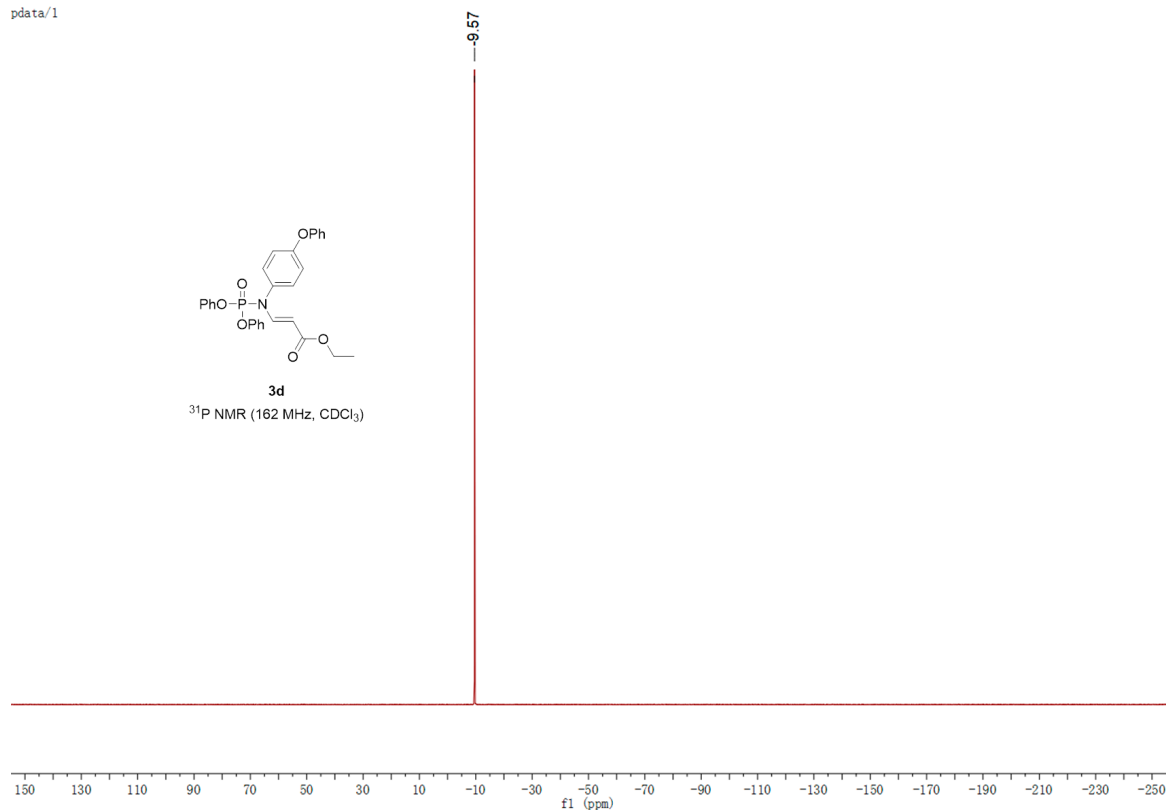

wg1181.1.1.1r

8.32, 8.30, 8.29, 8.27, 7.45, 7.43, 7.40, 7.38, 7.36, 7.25, 7.24, 7.23, 7.22, 7.06, 7.05, 7.04, 7.03, 4.83, 4.79, 4.20, 4.20, 4.18, 1.37, 1.30, 1.29, 1.27

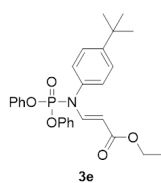

**3e**  
 $^1\text{H}$  NMR (400 MHz,  $\text{CDCl}_3$ )

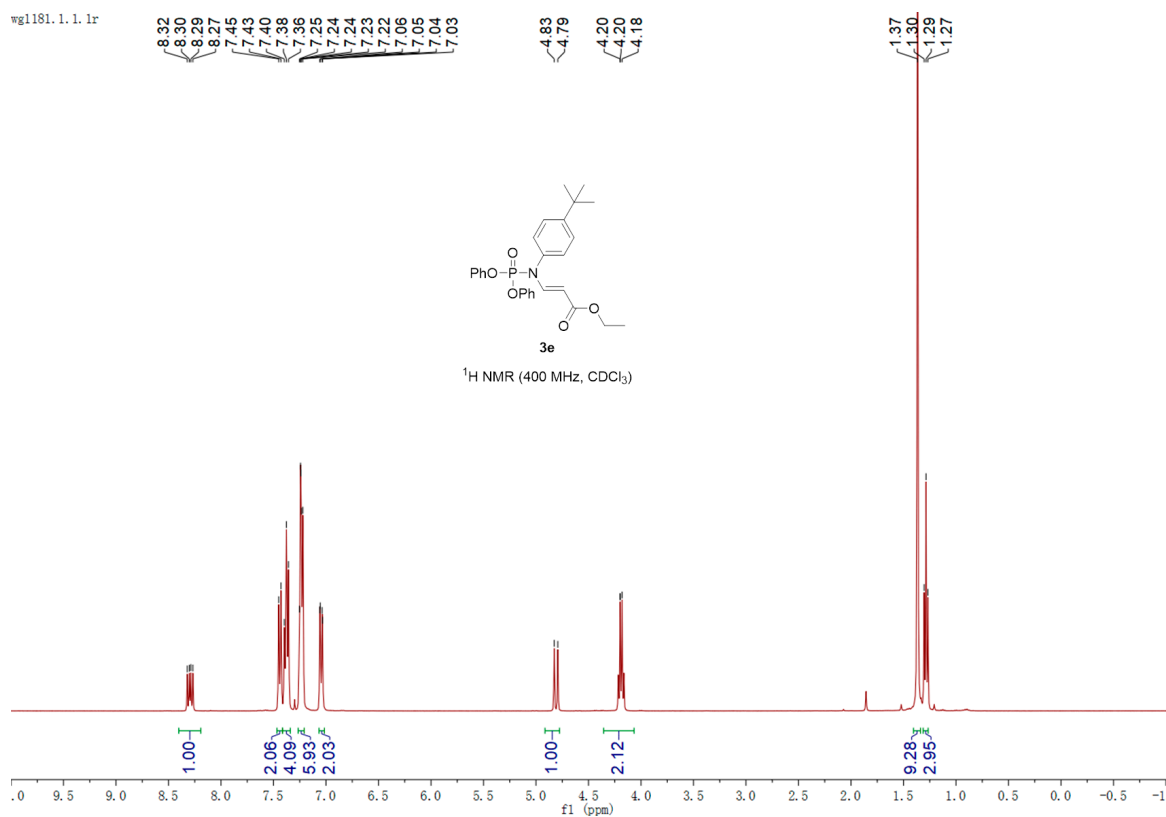

pdata/1

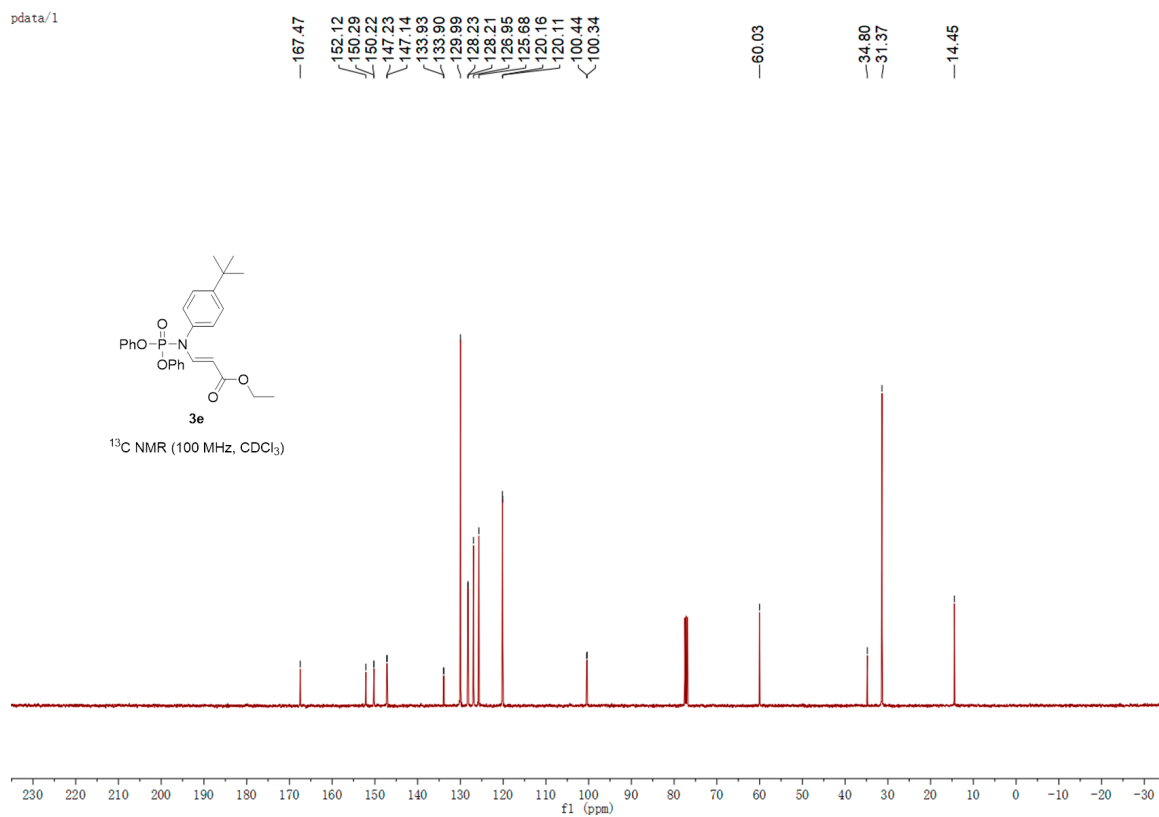

pdata/1

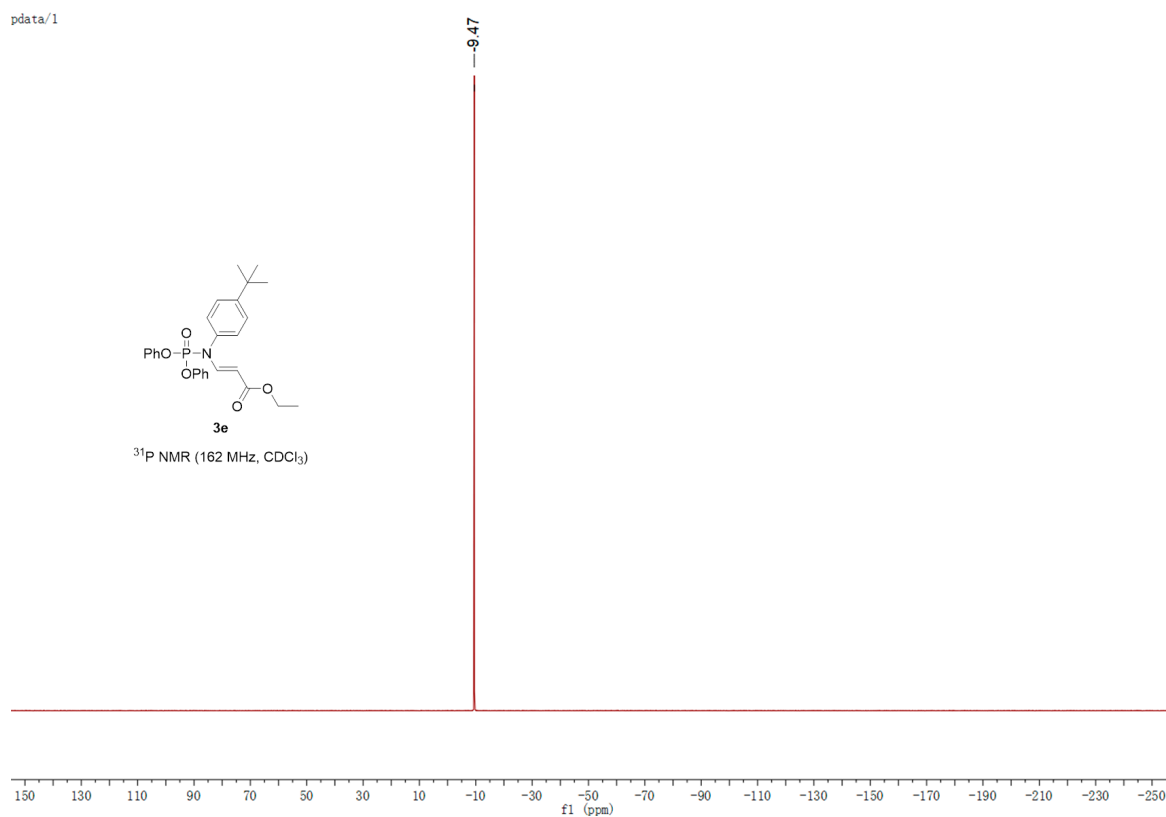

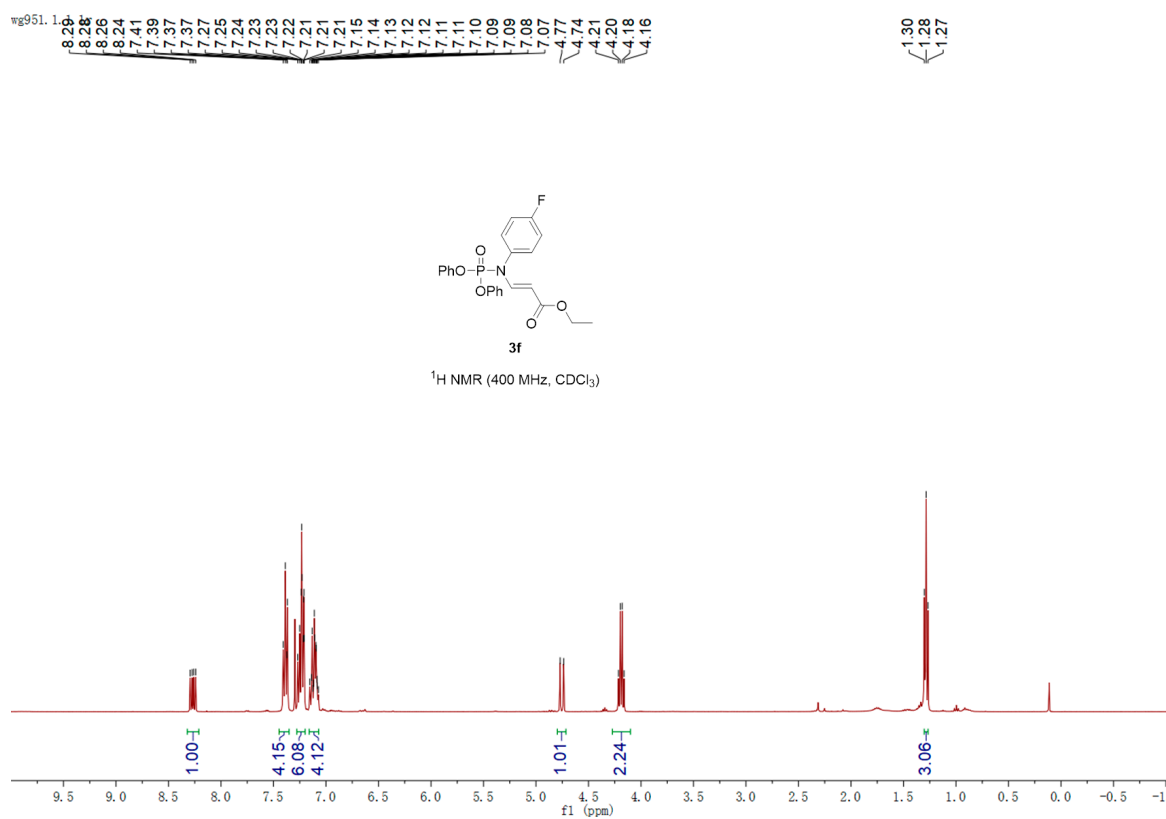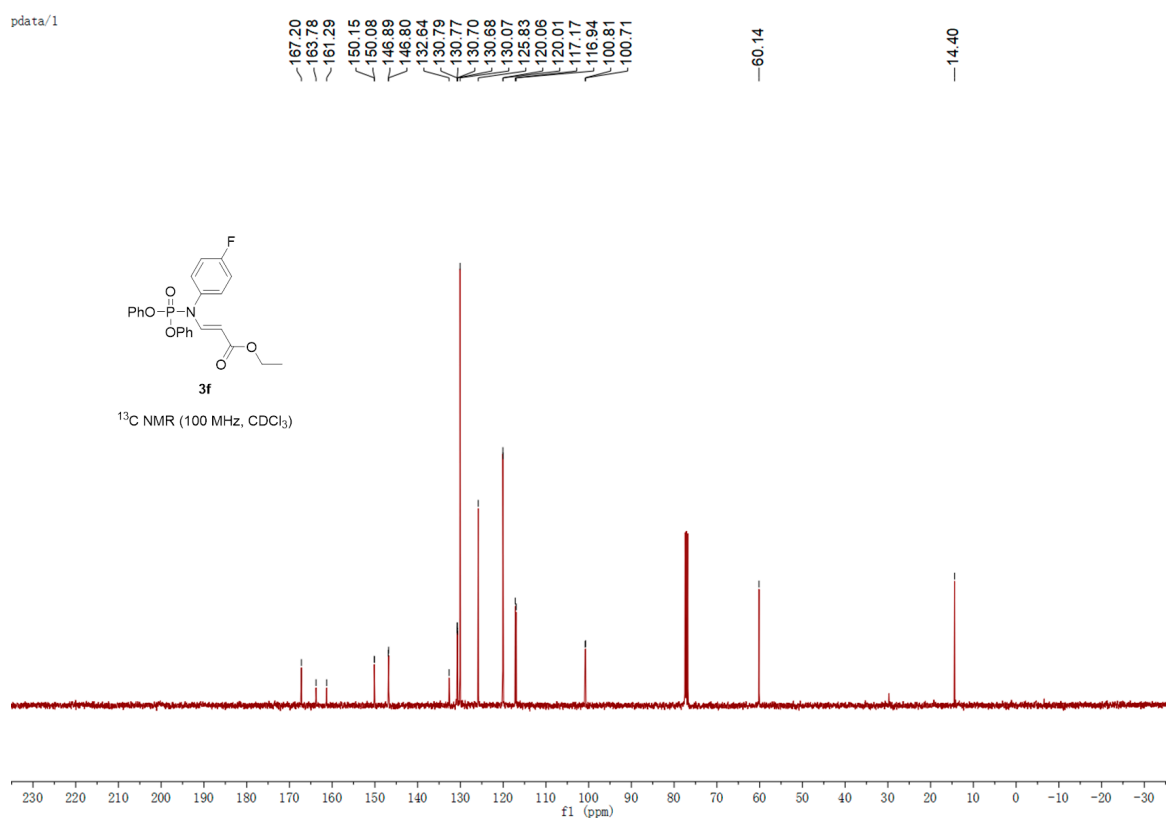

pdata/1

---111.60

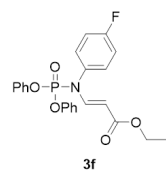

$^{19}\text{F}$  NMR (375 MHz,  $\text{CDCl}_3$ )

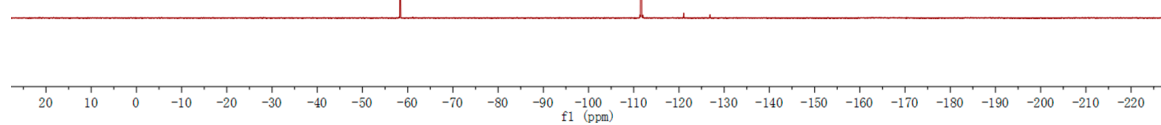

pdata/1

---9.82

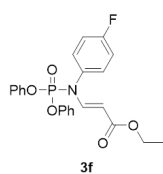

$^{31}\text{P}$  NMR (162 MHz,  $\text{CDCl}_3$ )

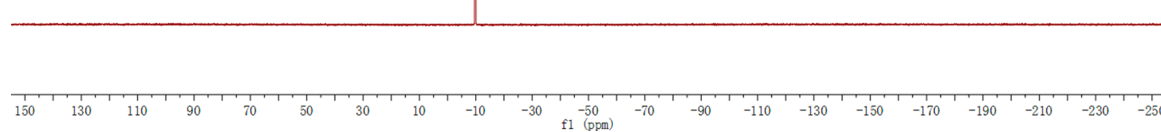



wg961.1.1.1r

8.28  
8.26  
8.24  
8.23  
7.43  
7.41  
7.39  
7.37  
7.28  
7.27  
7.26  
7.24  
7.24  
7.23  
7.22  
7.21  
7.07  
7.06  
7.04  
7.04  
4.79  
4.75  
4.22  
4.20  
4.18  
4.16

1.30  
1.29  
1.27

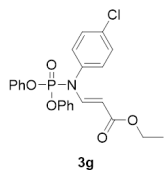

<sup>1</sup>H NMR (400 MHz, CDCl<sub>3</sub>)

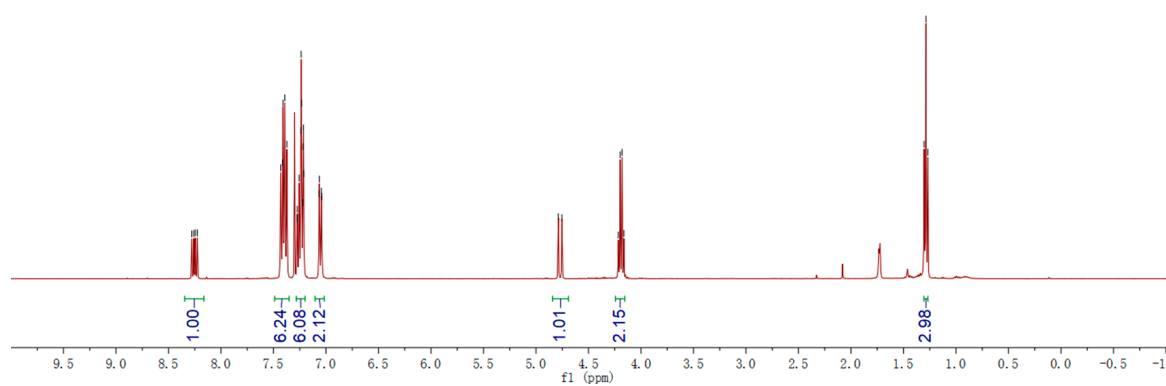

pdata/1

167.15  
150.11  
150.04  
146.59  
146.50  
135.36  
135.07  
130.32  
130.27  
130.25  
130.09  
125.87  
120.08  
120.03  
100.94  
100.85

60.17

14.40

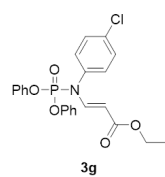

<sup>13</sup>C NMR (100 MHz, CDCl<sub>3</sub>)

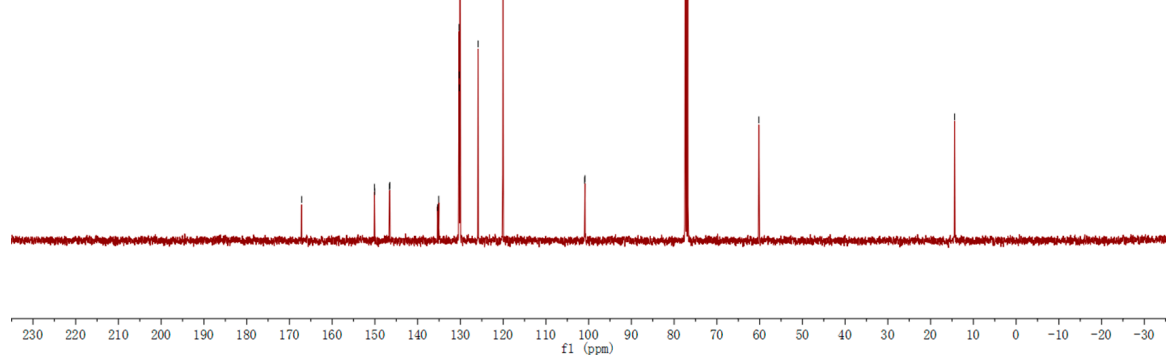

pdata/1

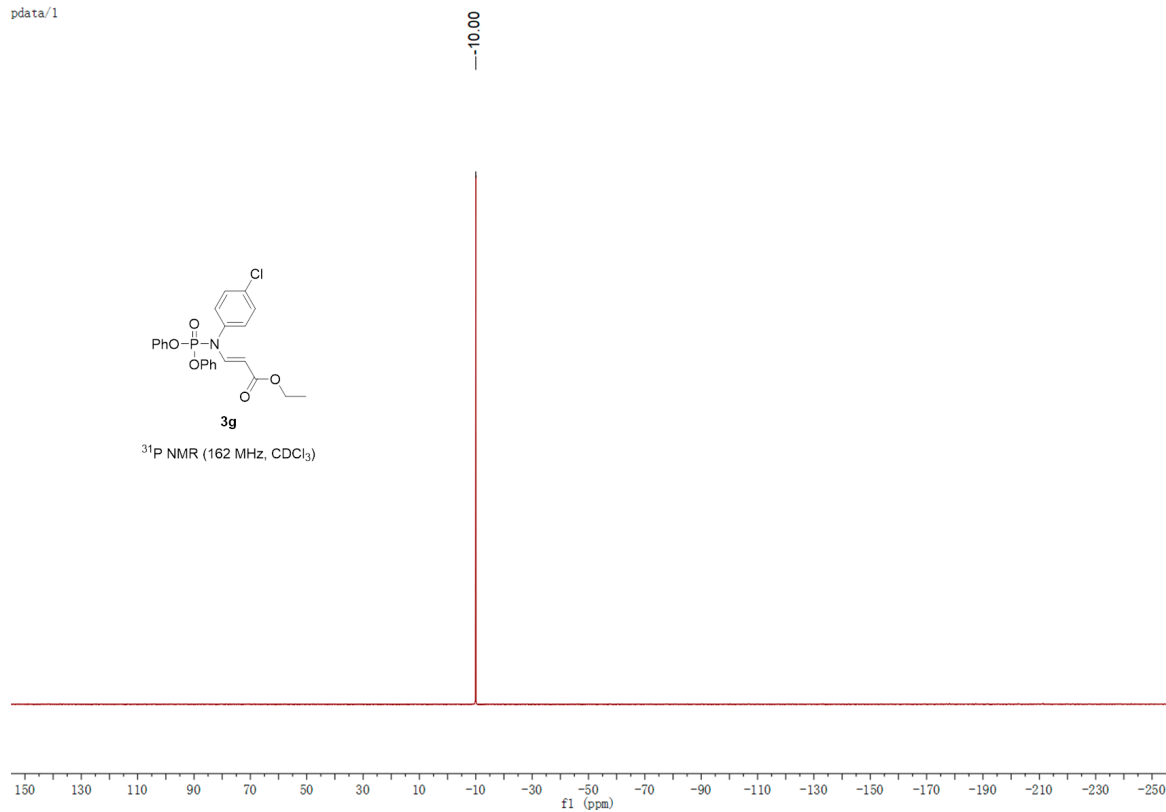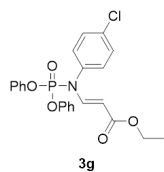

<sup>31</sup>P NMR (162 MHz, CDCl<sub>3</sub>)

mg969, 1. 1. 1r

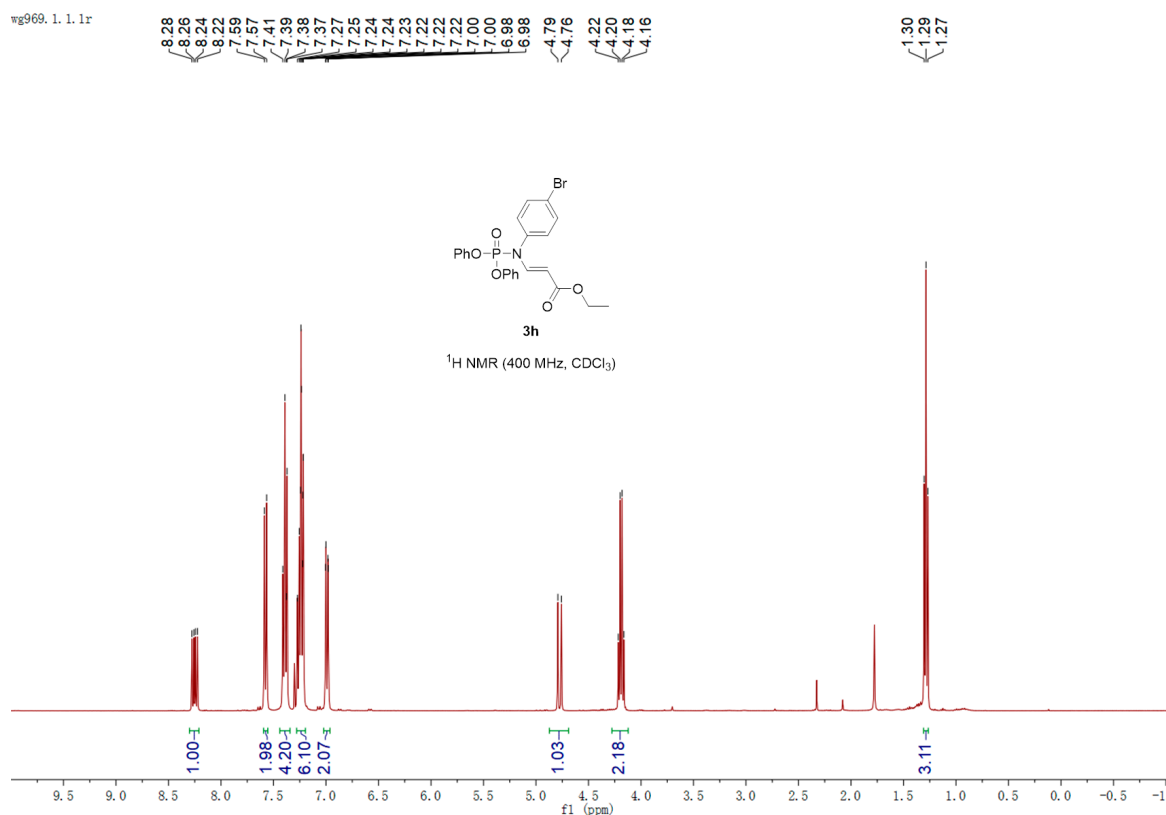

8.28, 8.26, 8.24, 8.22, 7.59, 7.57, 7.41, 7.39, 7.38, 7.37, 7.27, 7.25, 7.24, 7.23, 7.22, 7.22, 7.00, 7.00, 6.88, 4.79, 4.76, 4.22, 4.20, 4.18, 4.16, 1.30, 1.29, 1.27

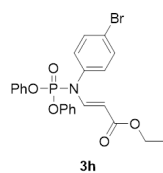

<sup>1</sup>H NMR (400 MHz, CDCl<sub>3</sub>)

1.00, 1.98, 4.20, 6.10, 2.07, 1.03, 2.18, 3.11

pdata/1

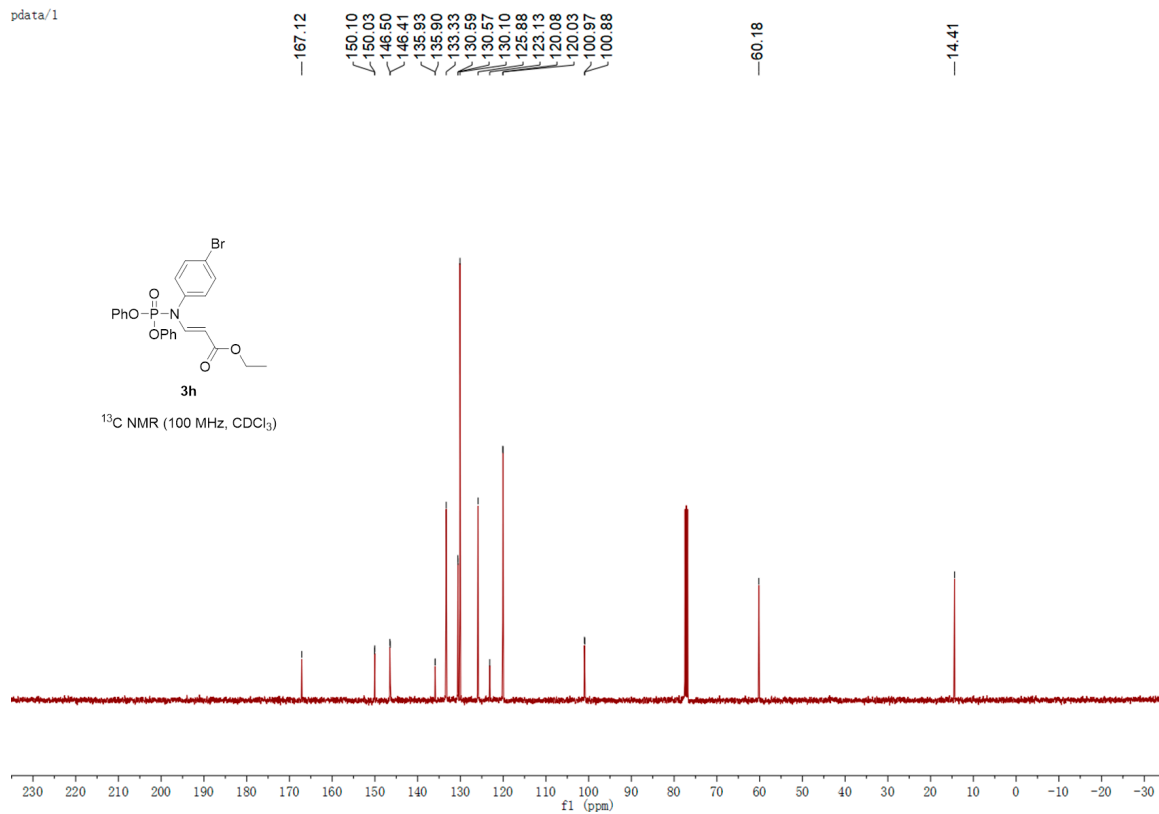

pdata/1

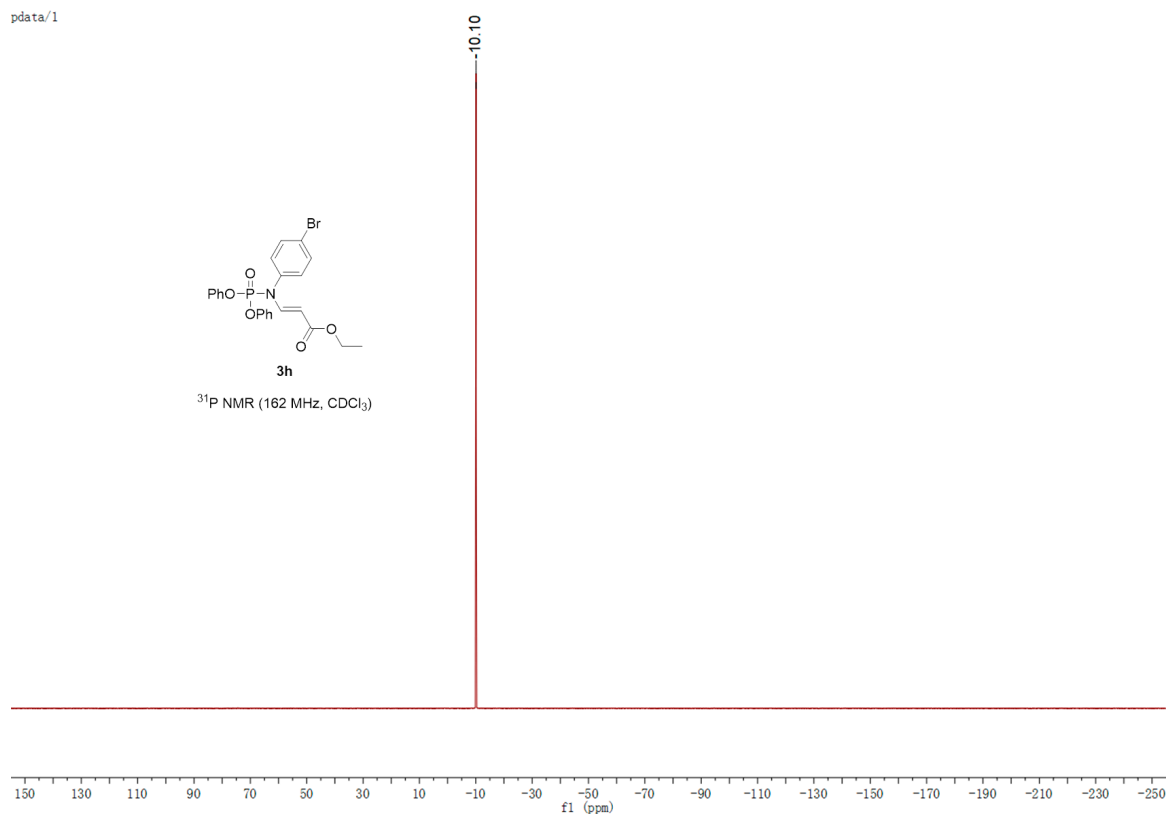

wg955.1.1.1r

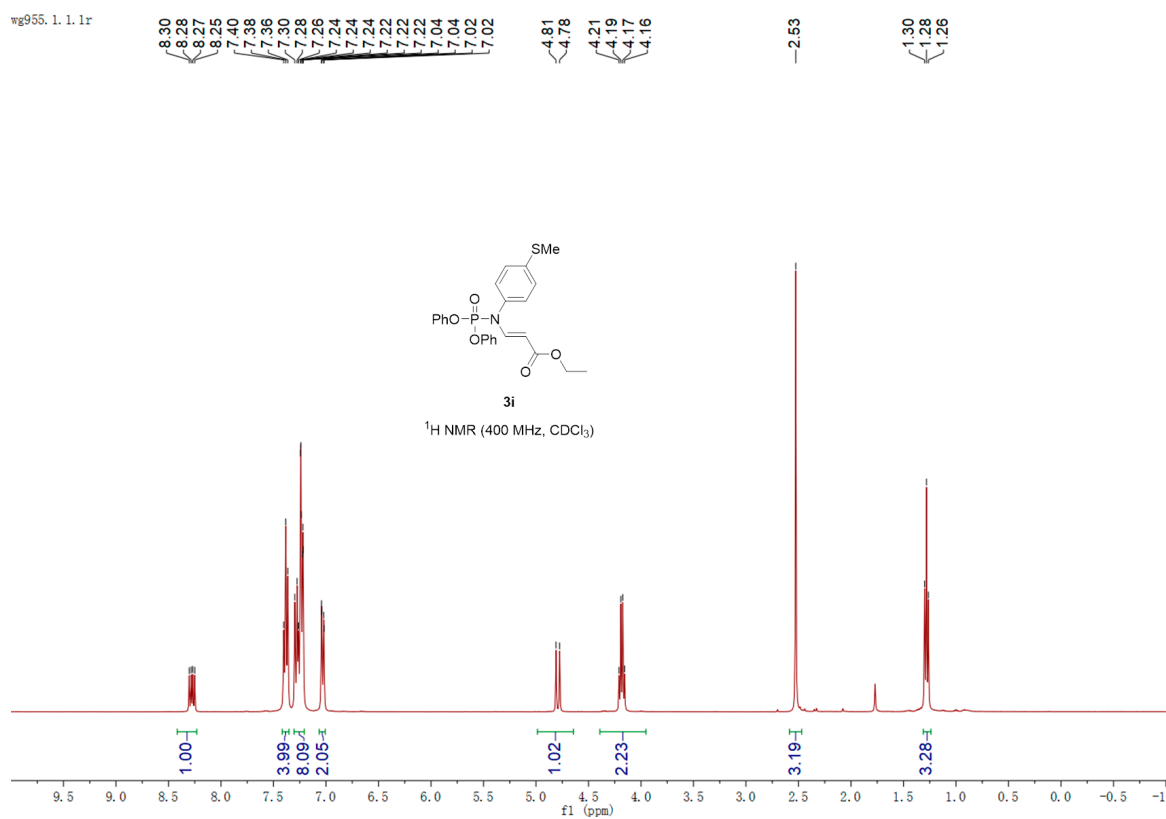

pdata/1

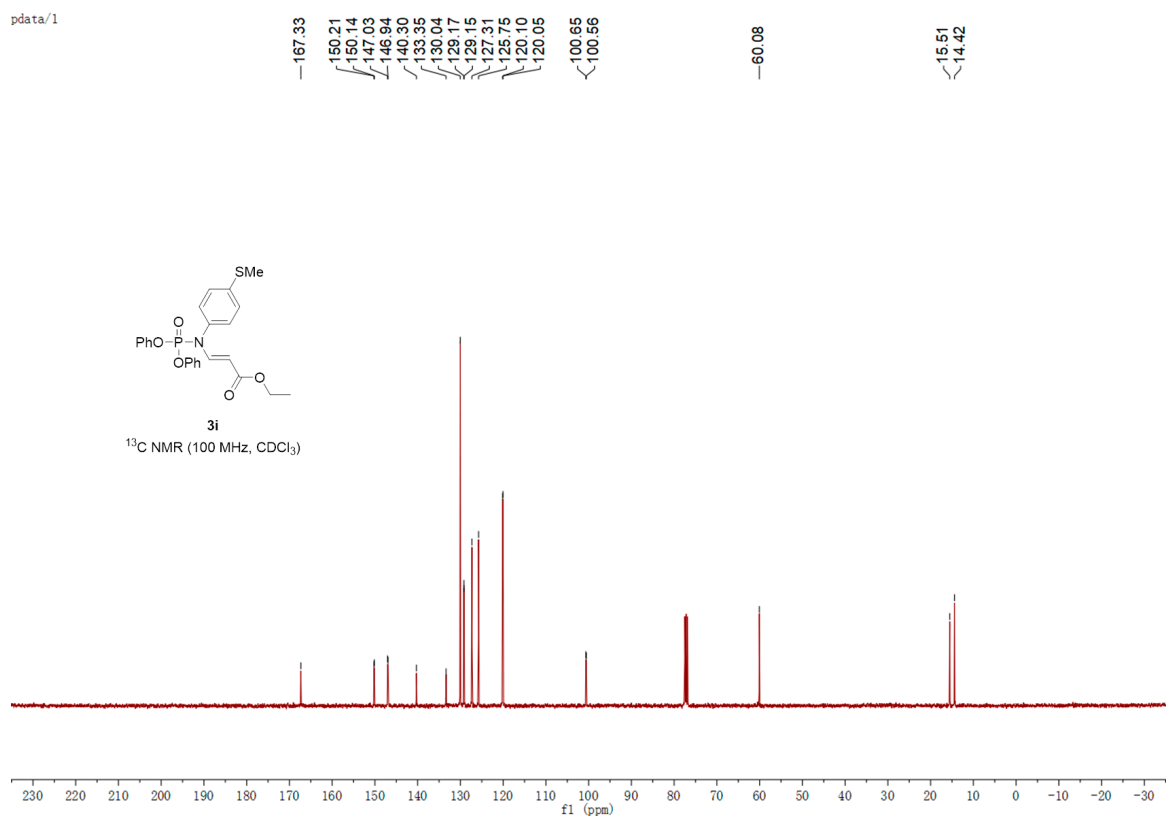

pdata/1

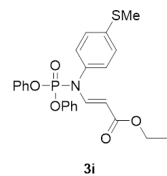

$^{31}\text{P}$  NMR (162 MHz,  $\text{CDCl}_3$ )

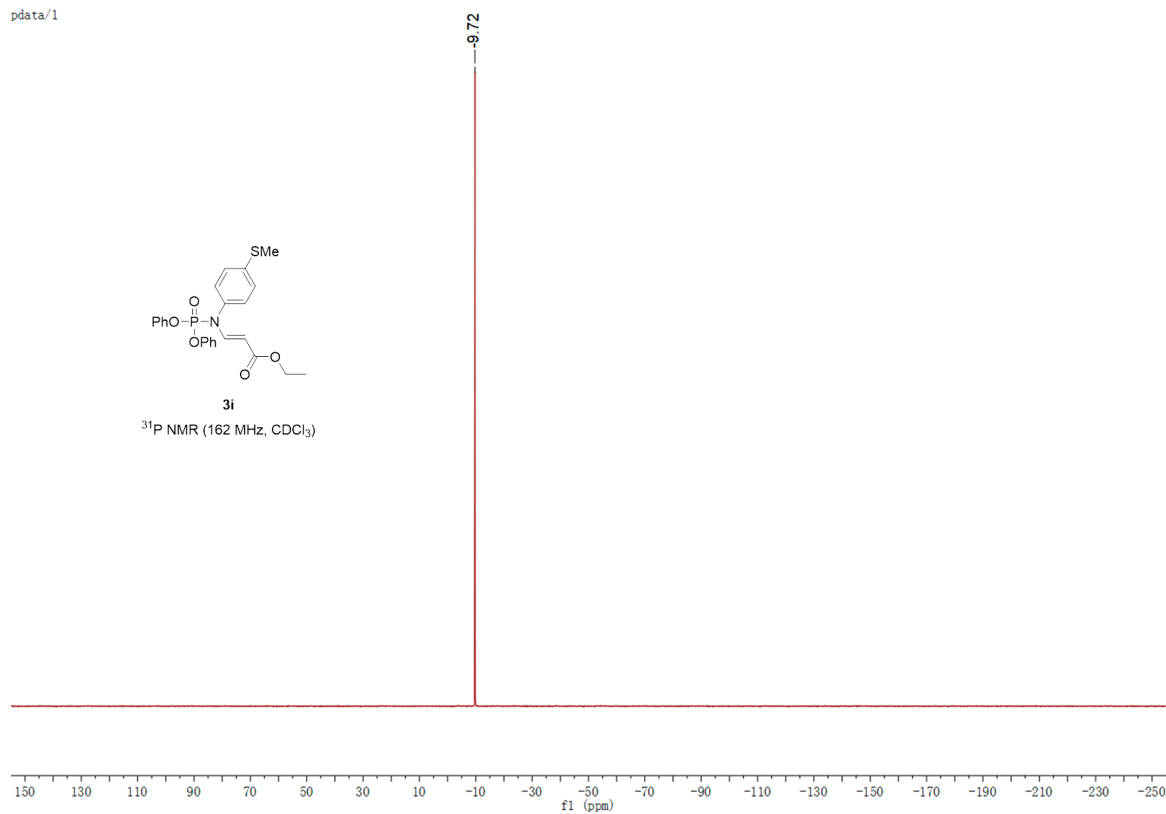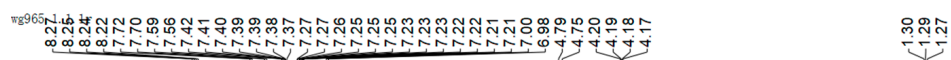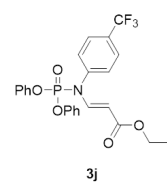

$^1\text{H}$  NMR (400 MHz,  $\text{CDCl}_3$ )

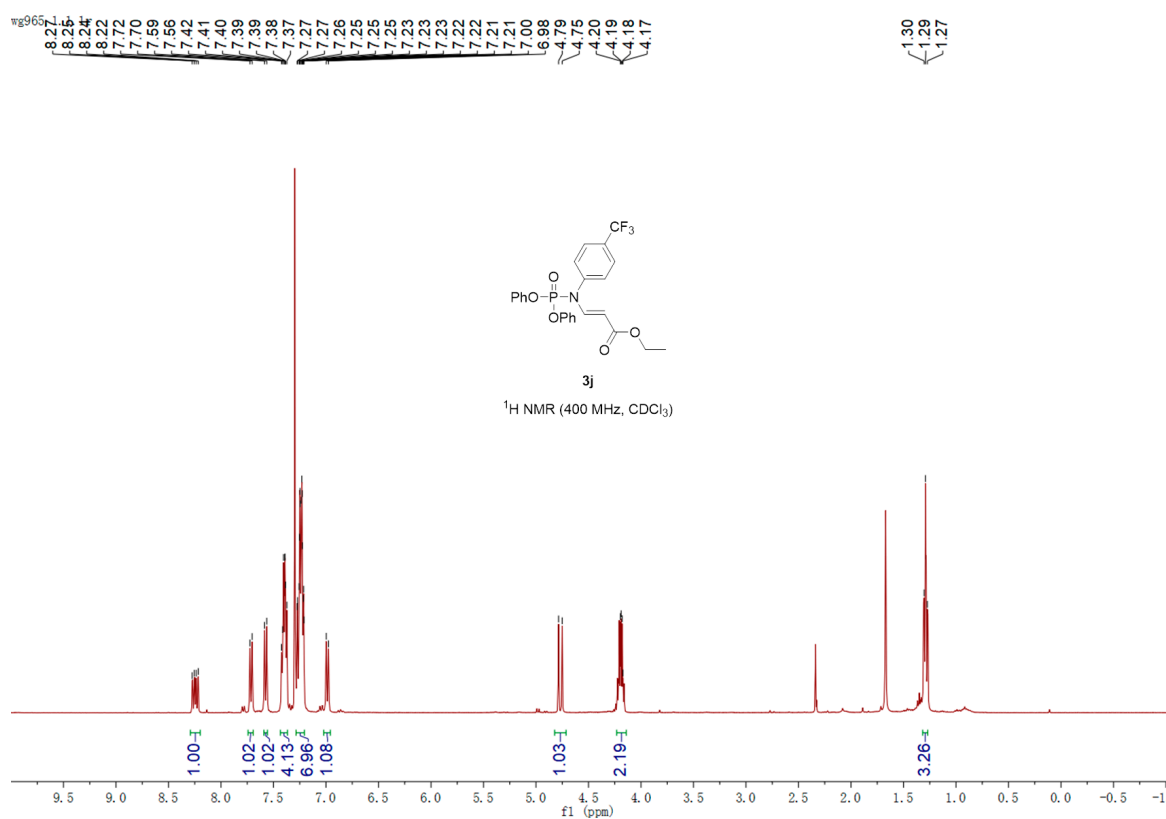

pdata/1

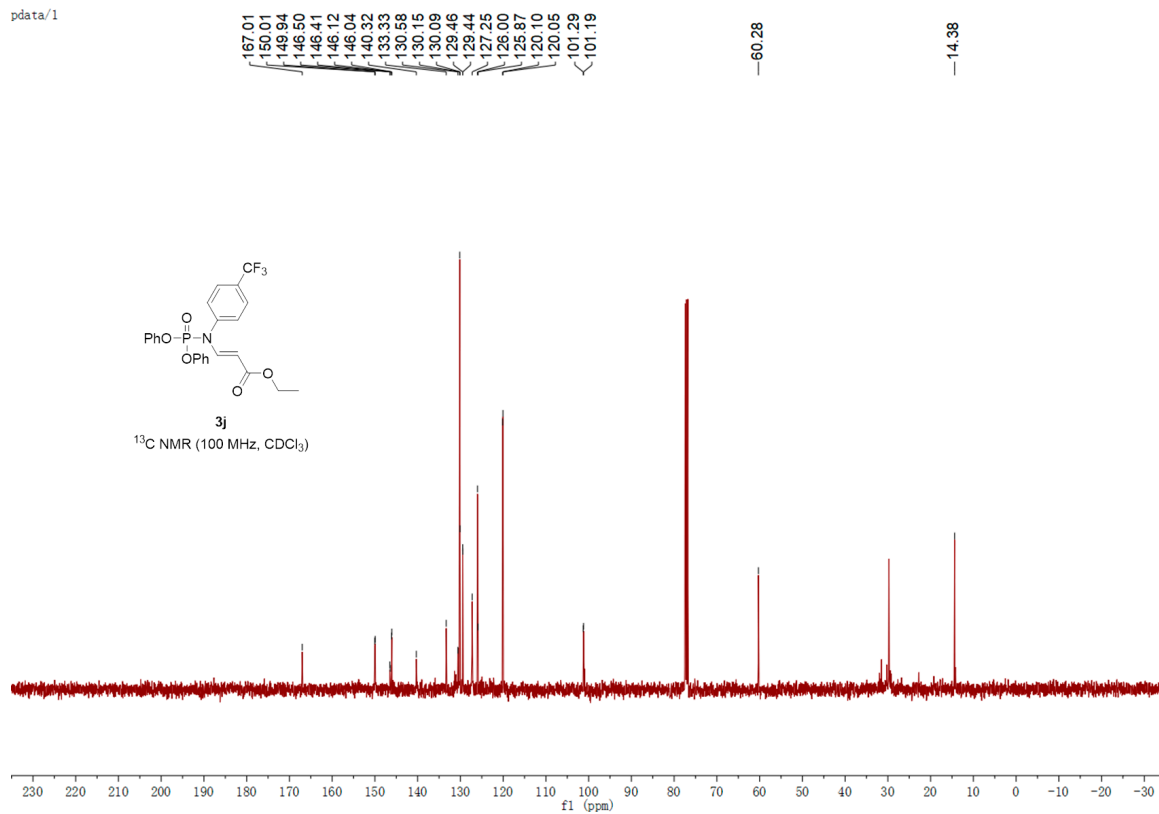

pdata/1

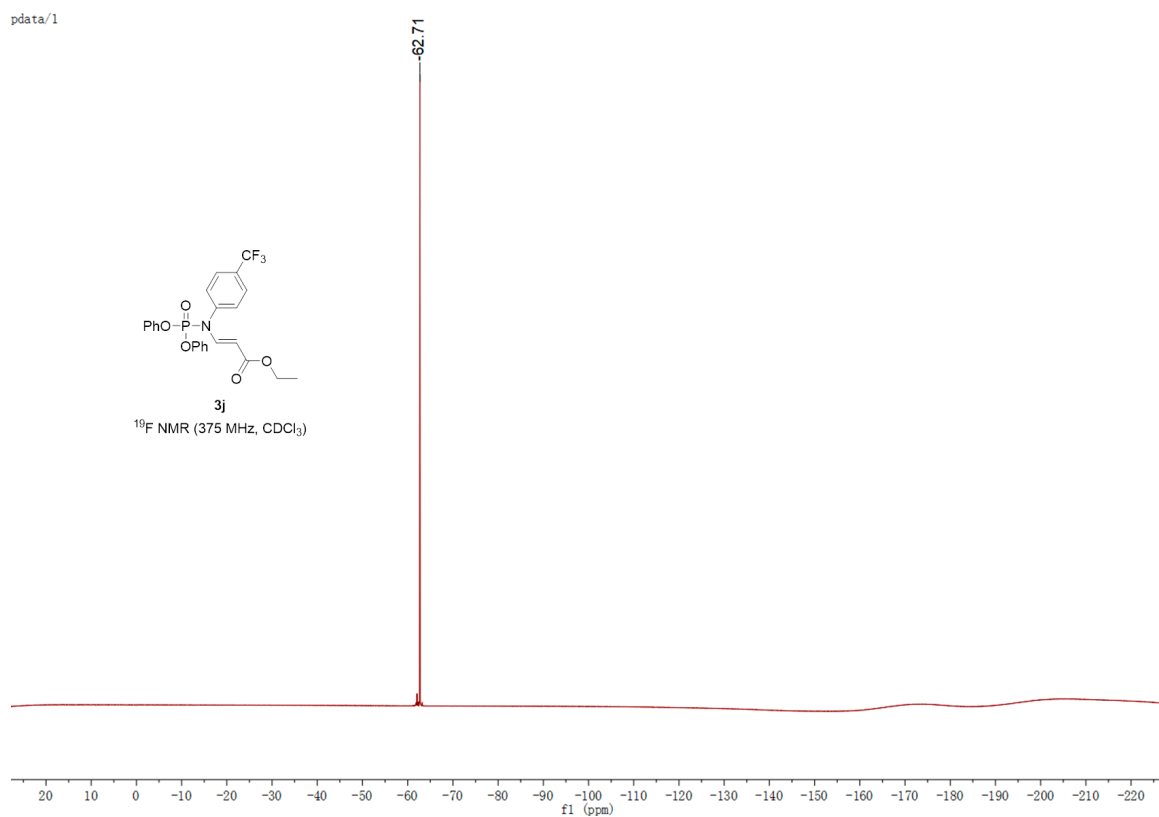

pdata/1

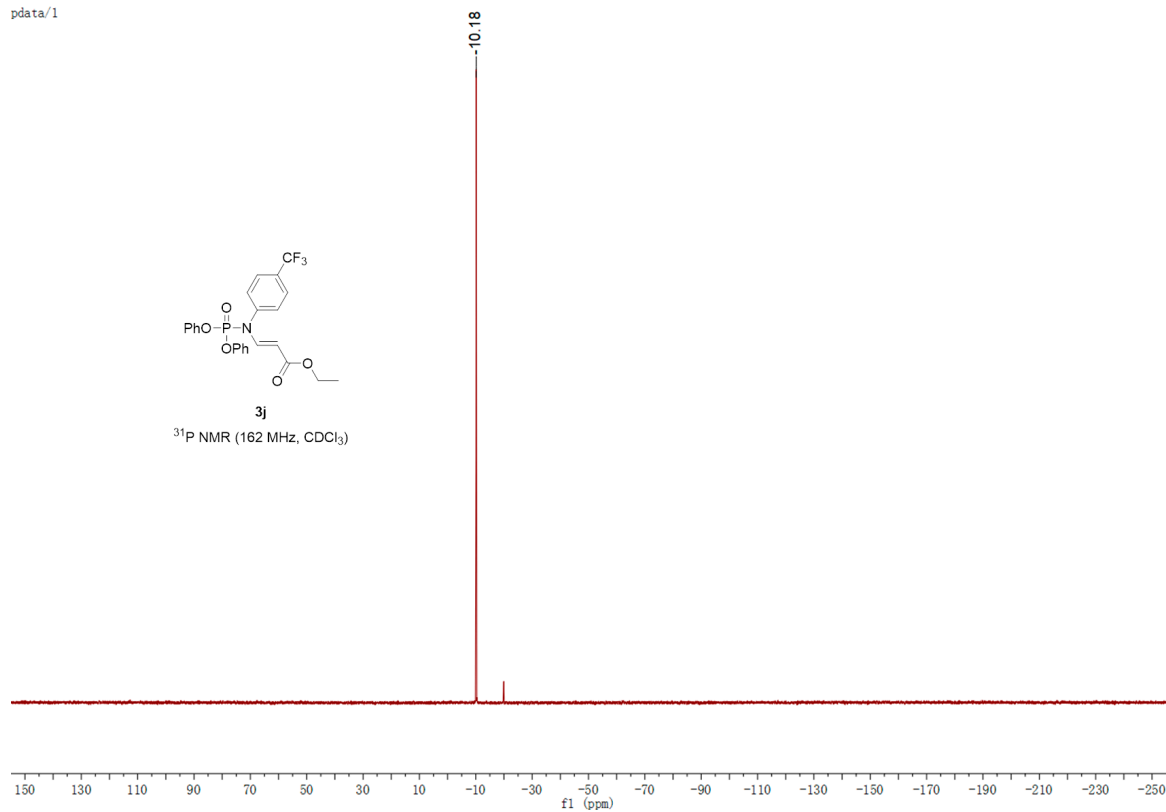

wg1185.1.1.1r

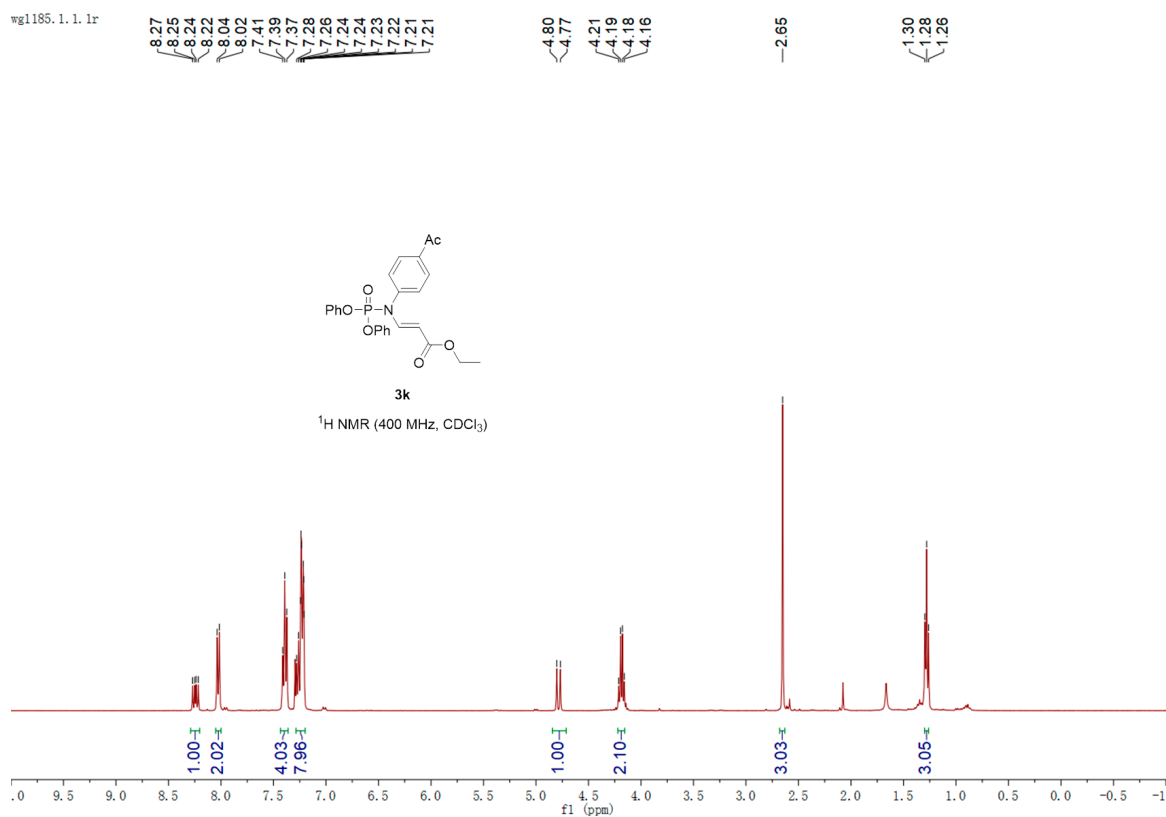

pdata/1

<sup>13</sup>C NMR (100 MHz, CDCl<sub>3</sub>)  
 196.83, 167.06, 149.98, 146.15, 146.07, 141.26, 137.29, 130.11, 130.06, 129.15, 129.13, 125.93, 120.10, 120.05, 101.23, 101.14, 60.21, 26.77, 14.39

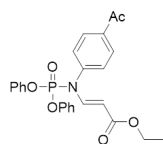

**3k**

<sup>13</sup>C NMR (100 MHz, CDCl<sub>3</sub>)

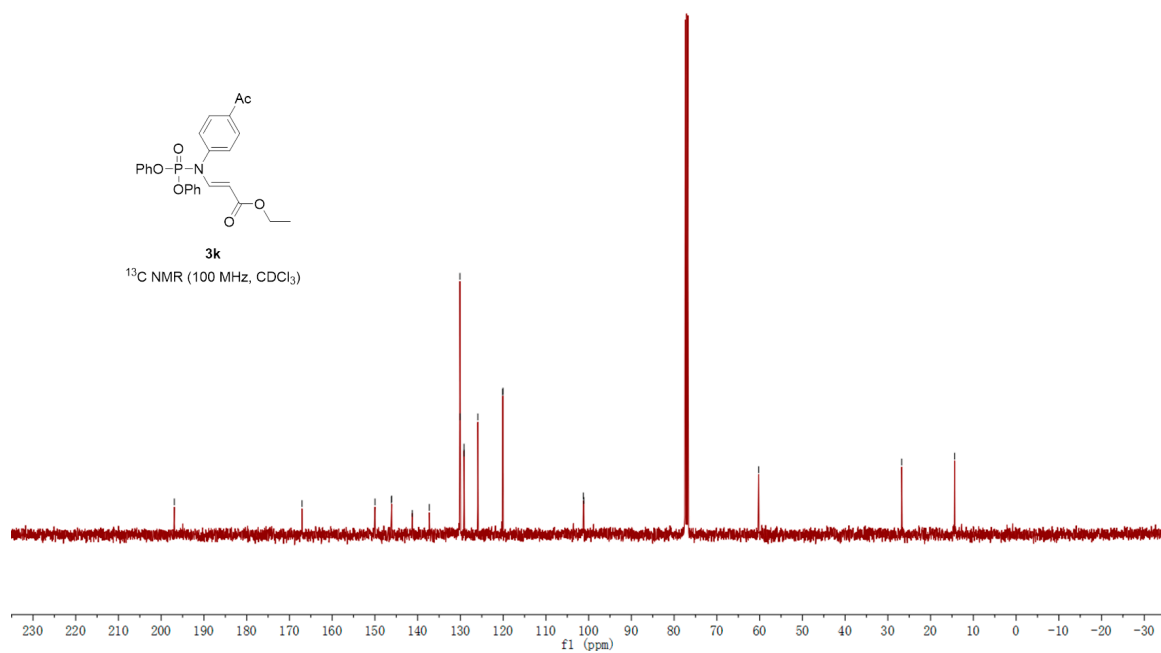

pdata/1

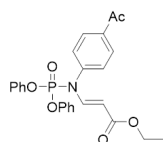

**3k**

<sup>31</sup>P NMR (162 MHz, CDCl<sub>3</sub>)

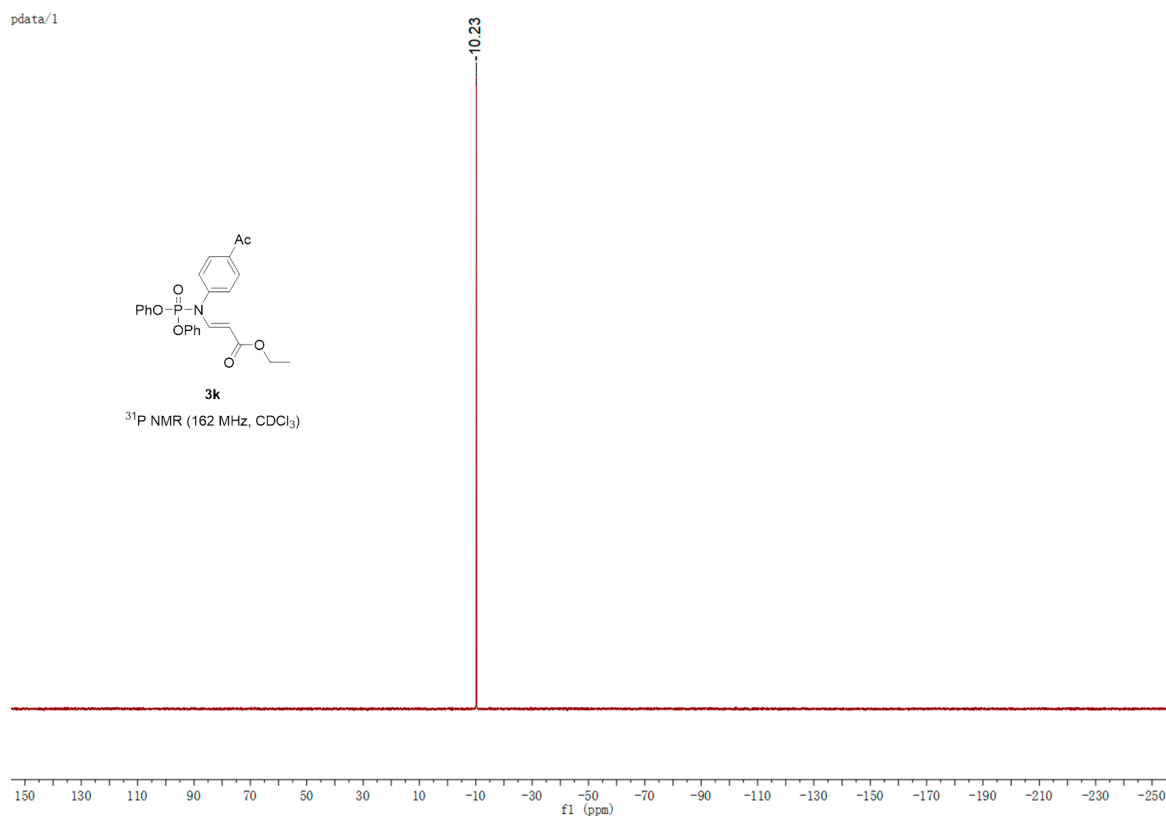



wg1191.1.1.1r

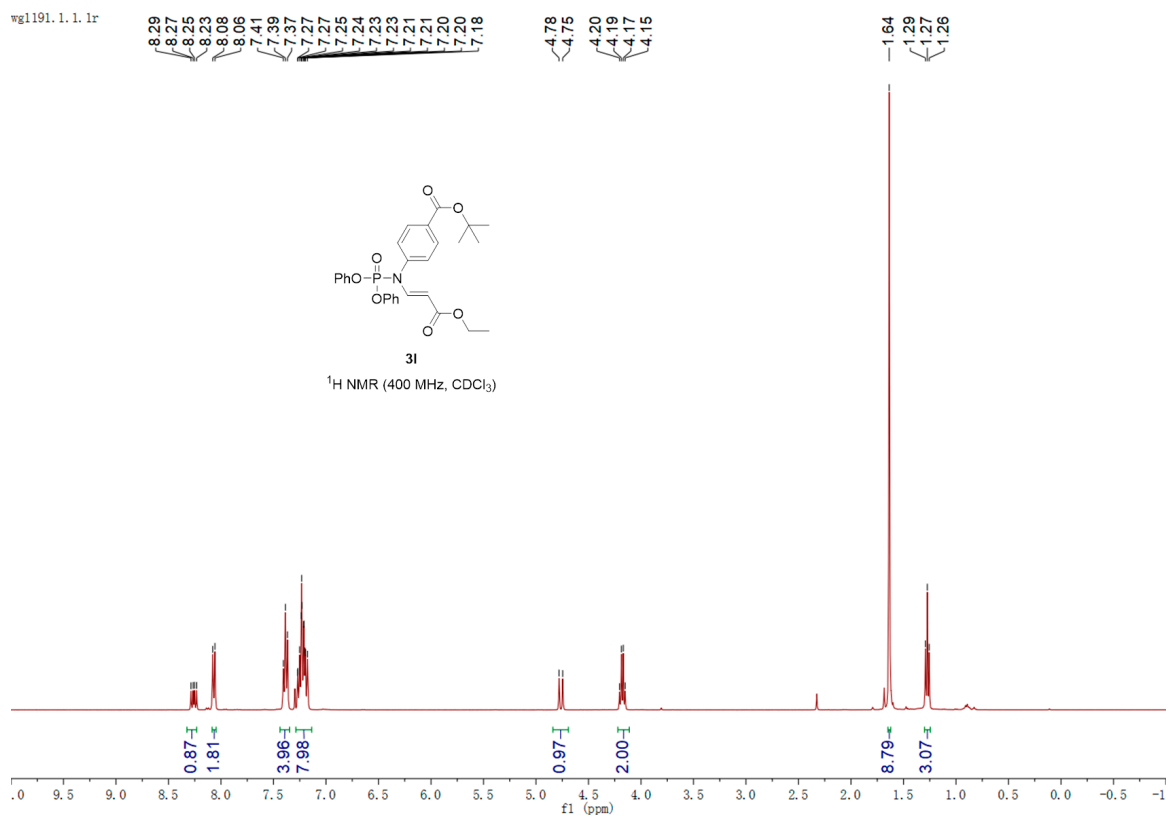

pdata/1

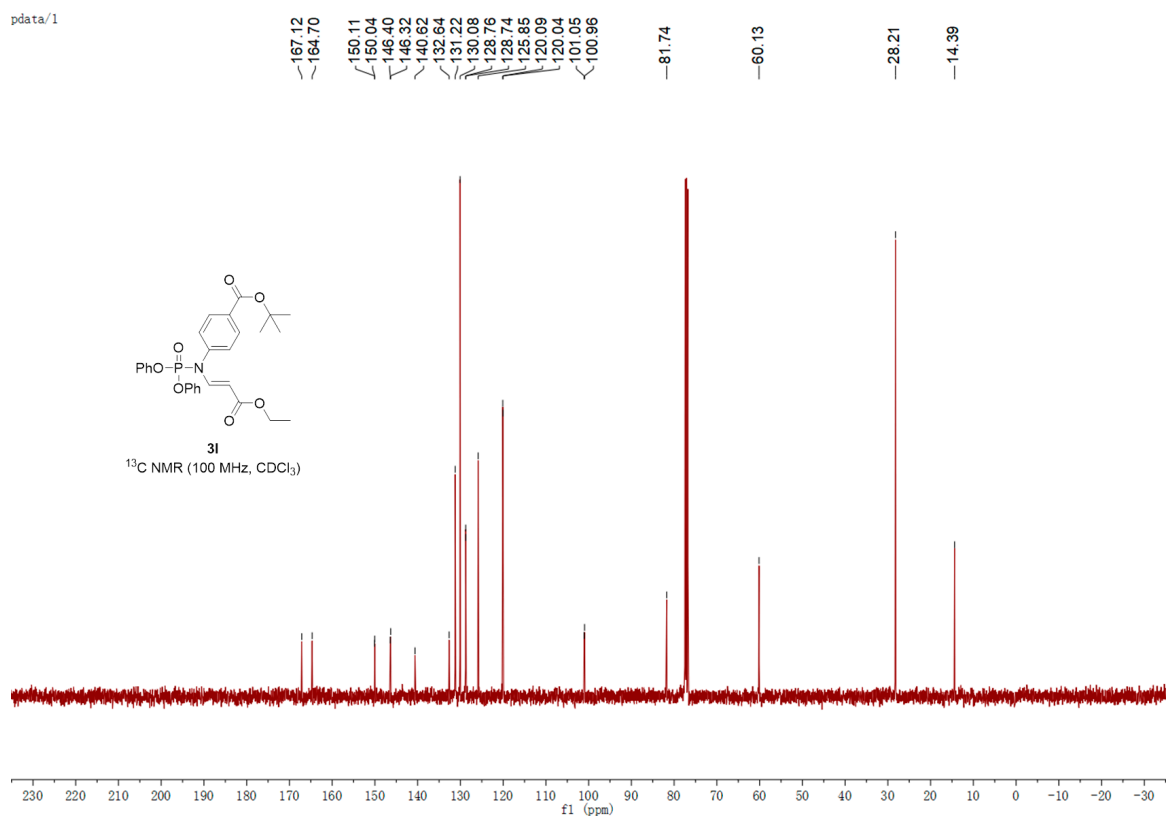

pdata/1

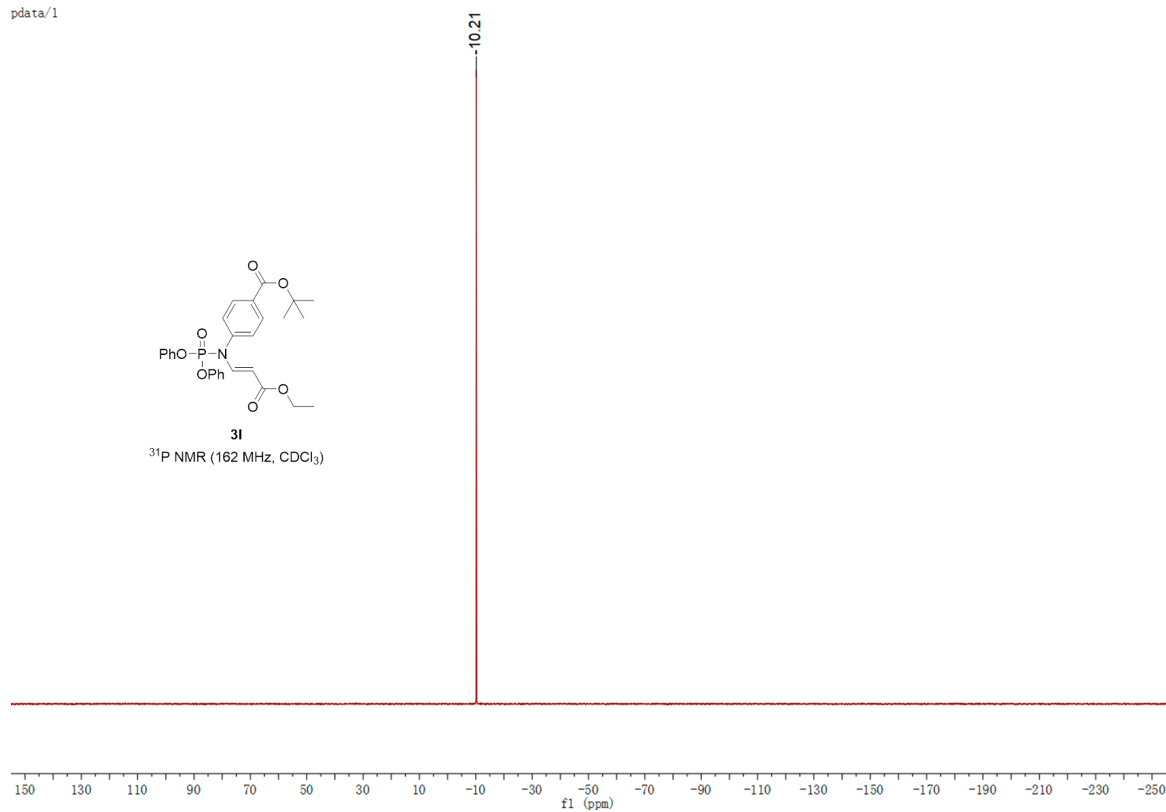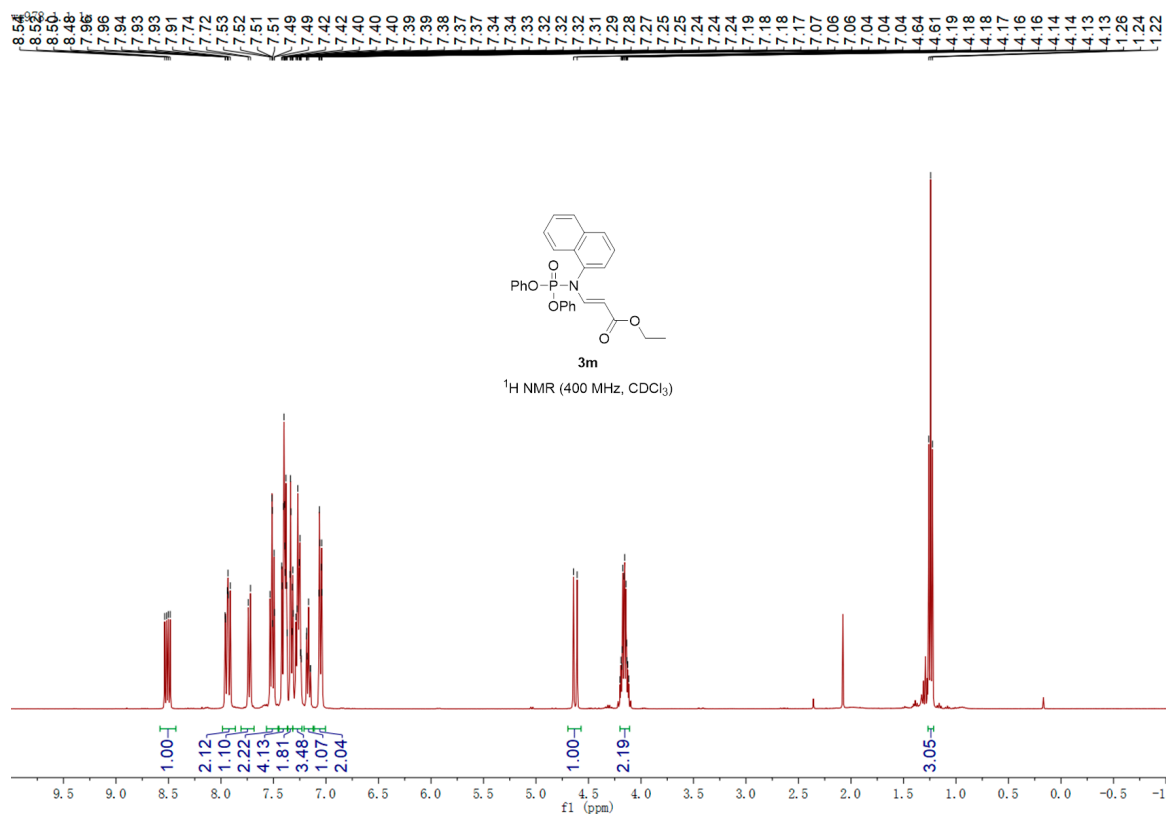

pdata/1

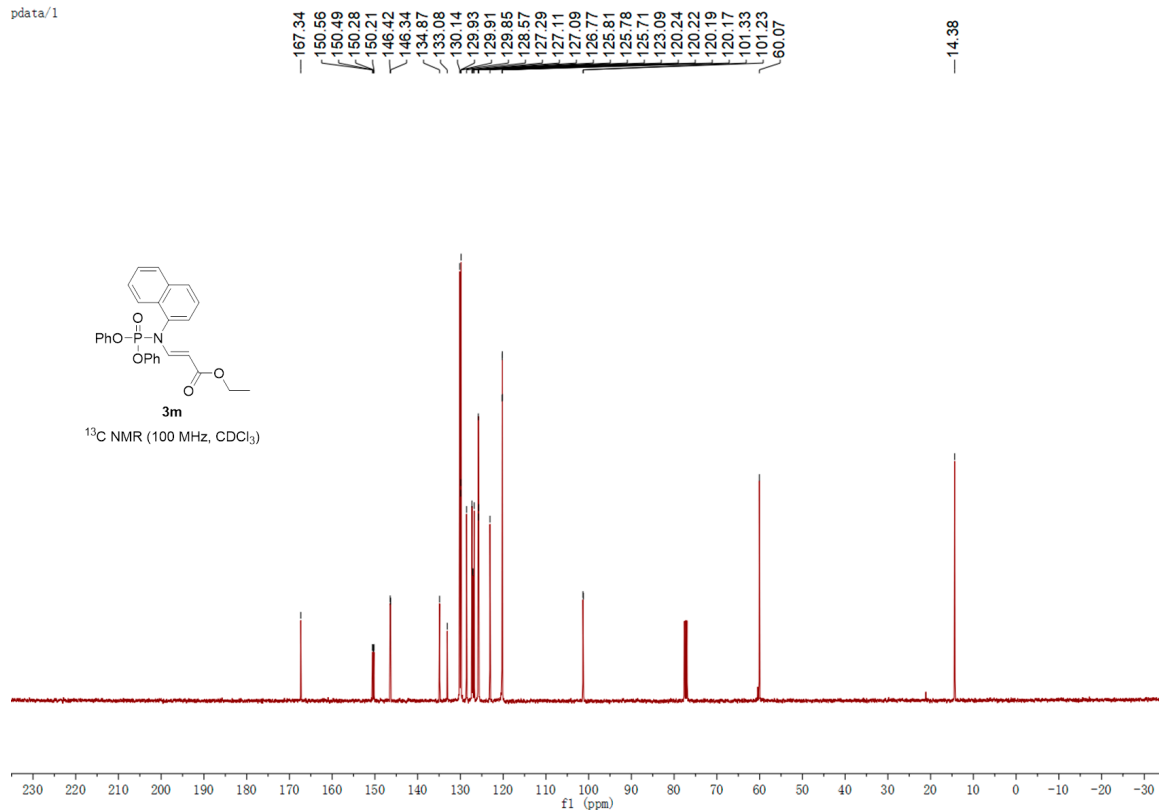

pdata/1

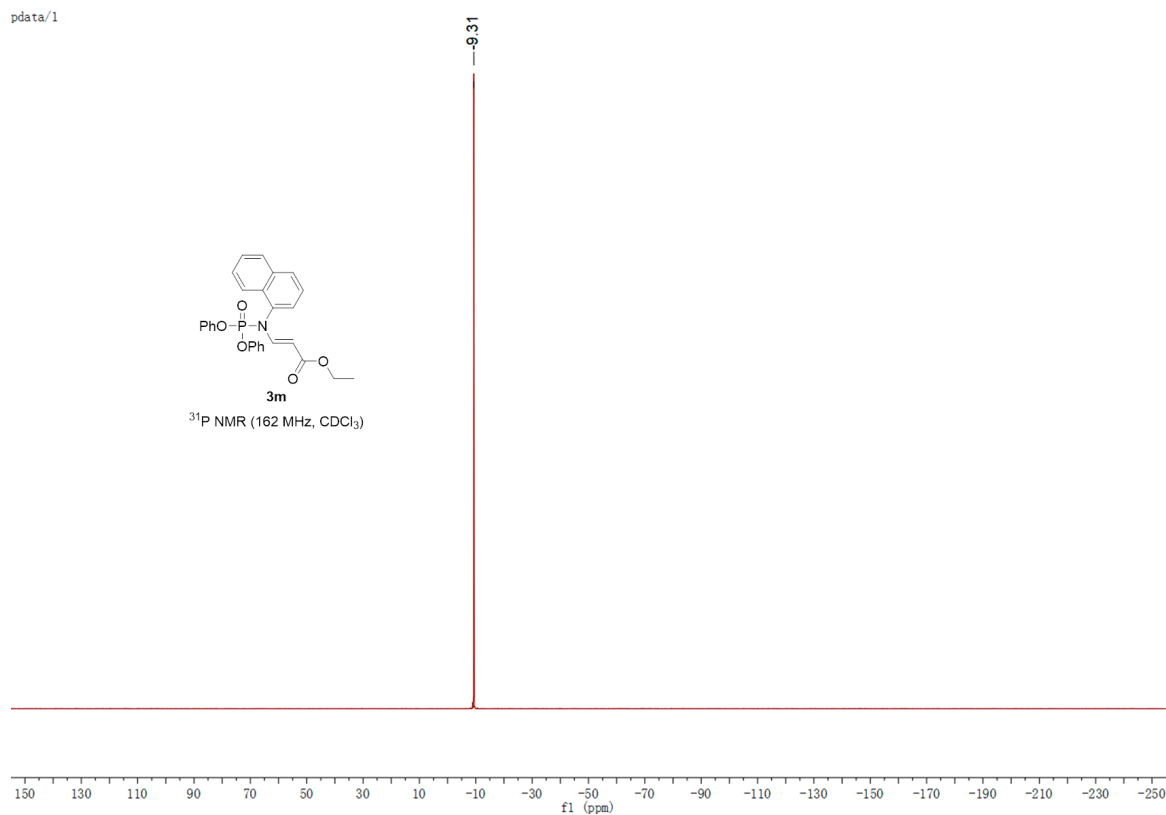

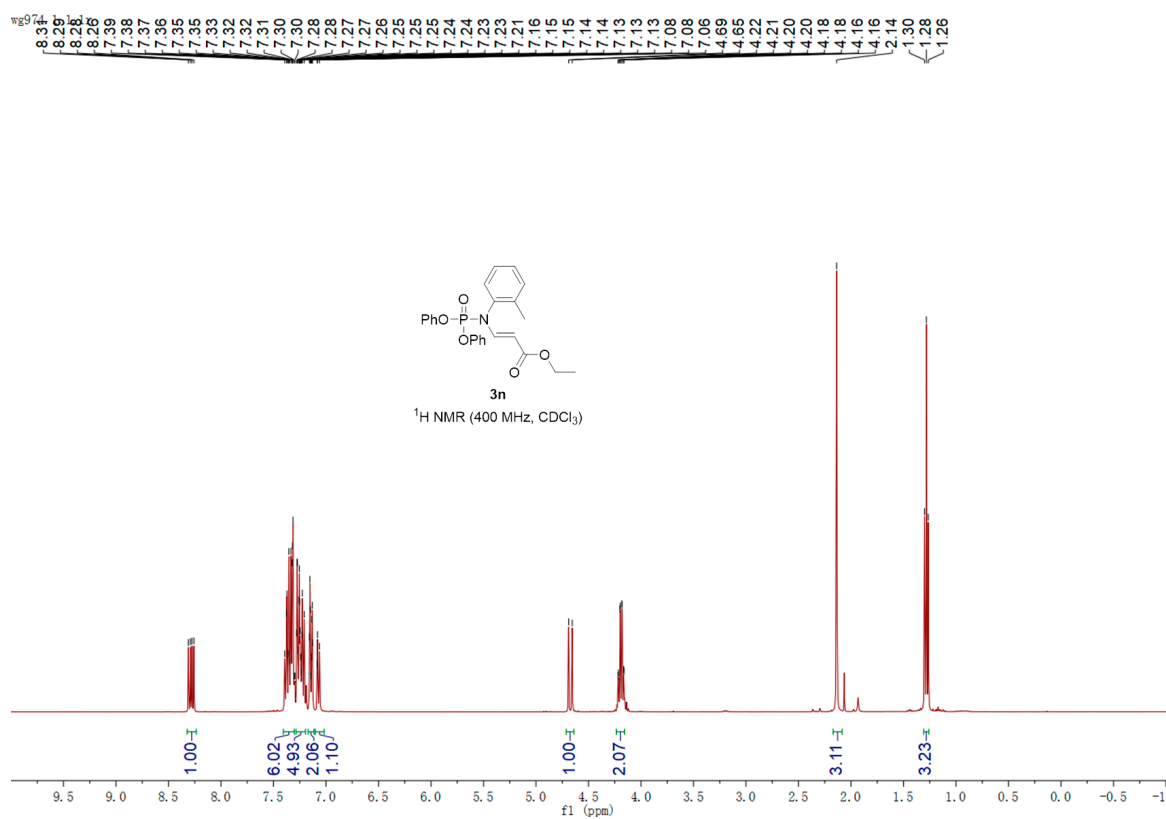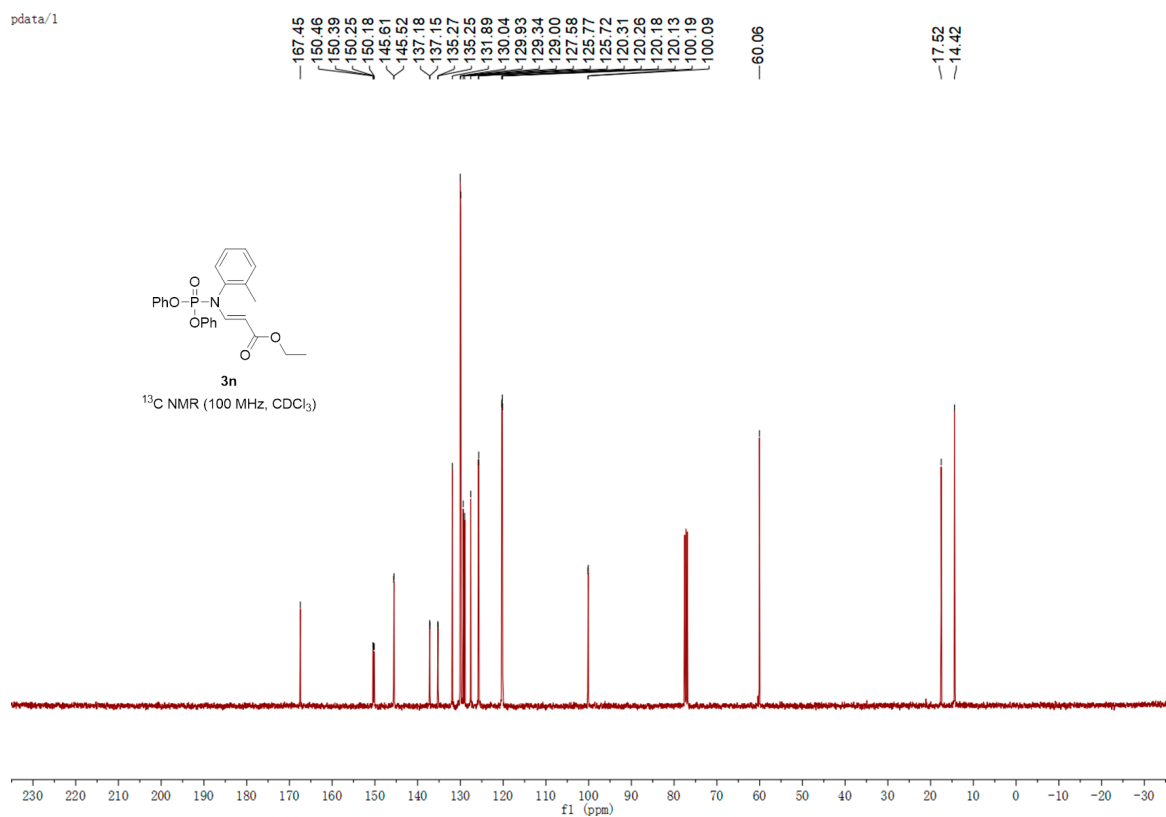

pdata/1

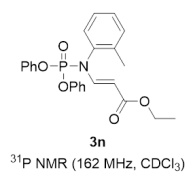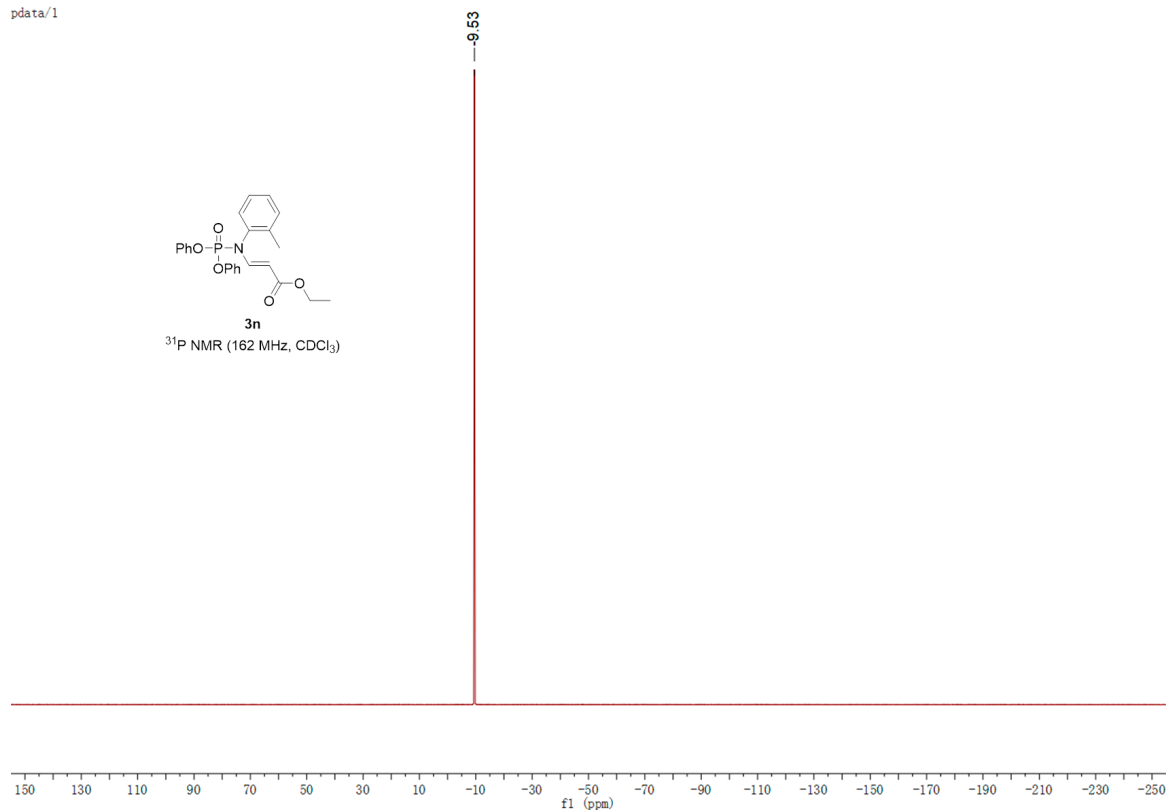

wg1192.1.1.1r

8.28  
8.26  
8.24  
8.23  
7.96  
7.94  
7.92  
7.92  
7.24  
7.22  
7.21  
7.19  
6.95  
4.77  
4.73  
4.24  
4.23  
4.21  
4.19  
-2.32  
-2.13  
1.33  
1.31  
1.29

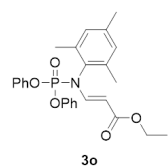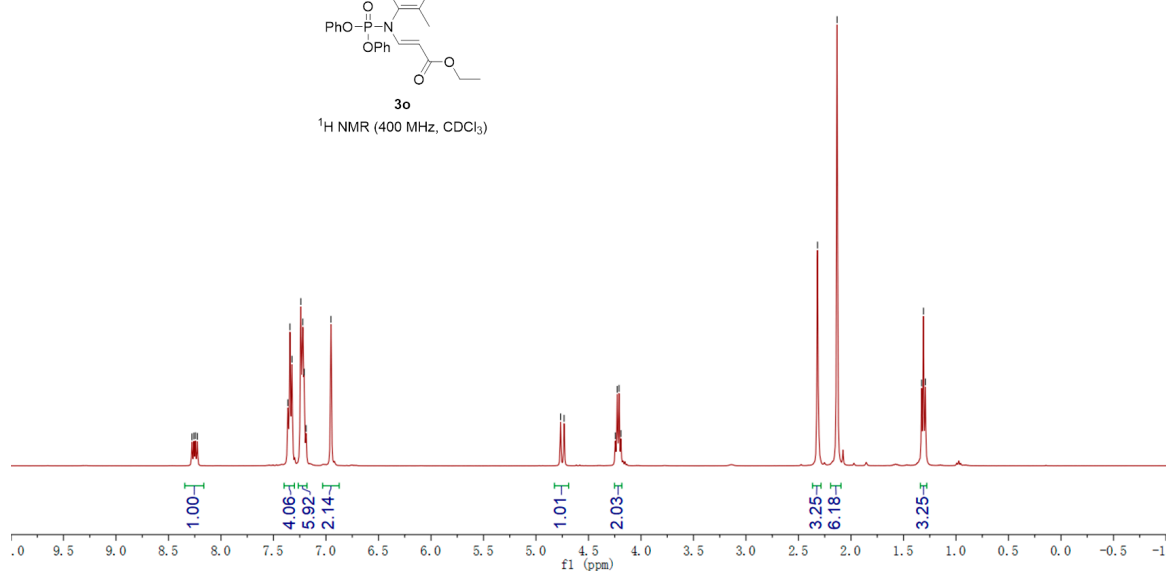

pdata/1

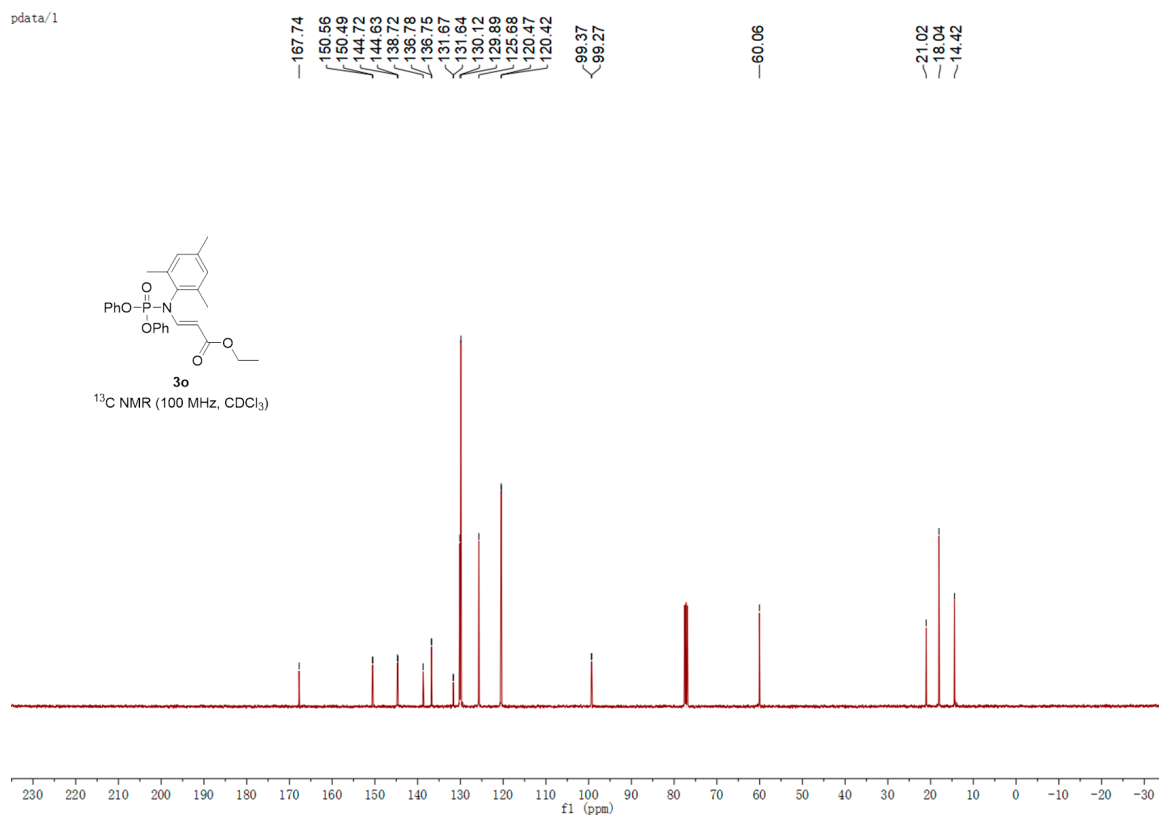

pdata/1

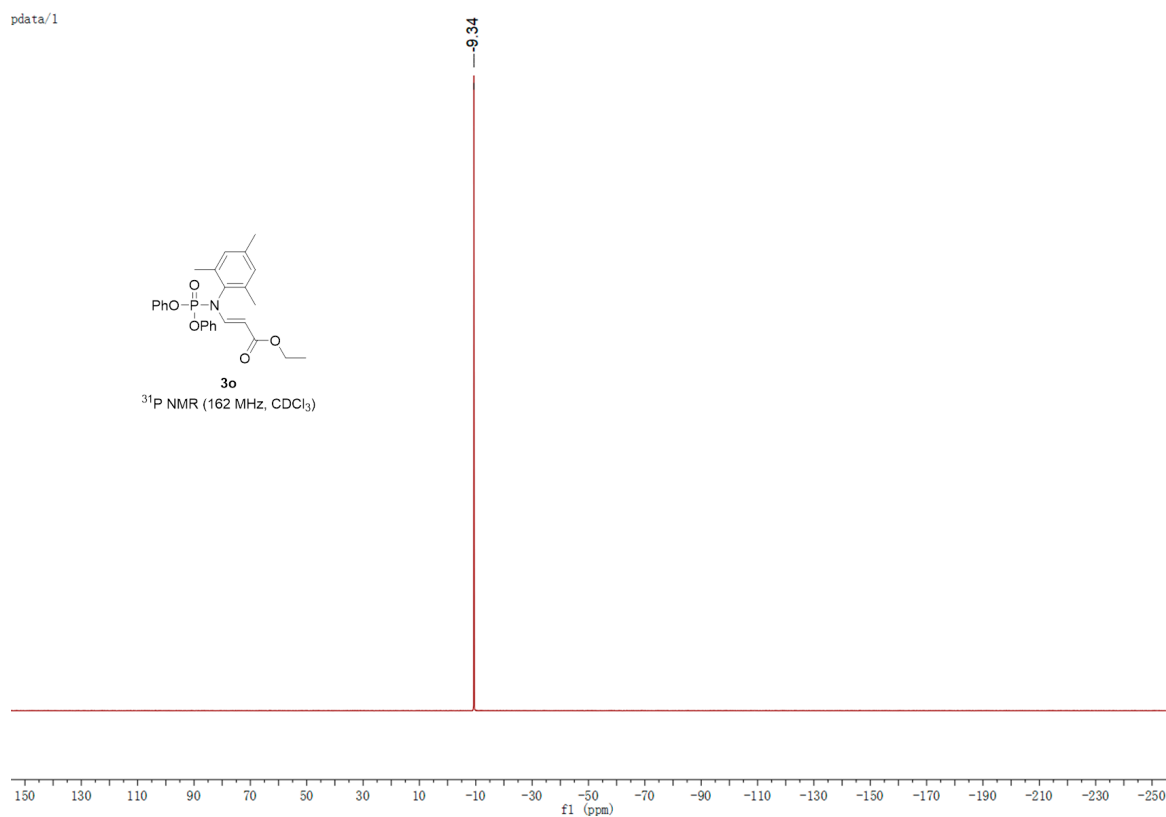

wg957.1.1.1r

8.42  
8.40  
8.39  
8.37  
7.52  
7.50  
7.48  
7.37  
7.35  
7.34  
7.15  
6.79

4.92  
4.89  
4.33  
4.31  
4.29  
4.27

2.41

1.41  
1.40  
1.38

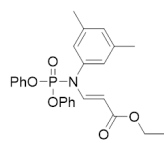

**3p**

<sup>1</sup>H NMR (400 MHz, CDCl<sub>3</sub>)

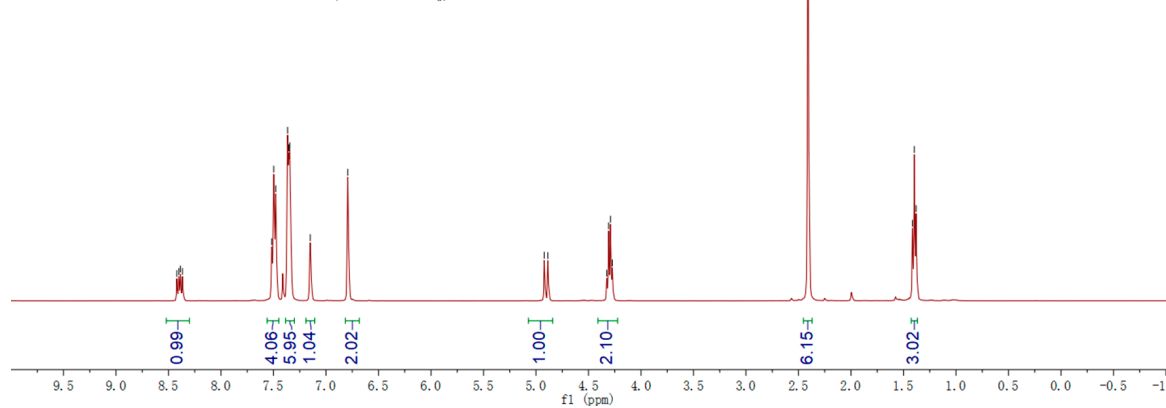

pdata/1

167.49  
150.35  
150.28  
147.19  
147.10  
139.71  
136.41  
136.38  
130.68  
129.96  
126.34  
126.31  
125.66  
120.17  
120.12  
100.46  
100.37

60.00

21.22  
14.44

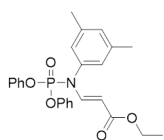

**3p**

<sup>13</sup>C NMR (100 MHz, CDCl<sub>3</sub>)

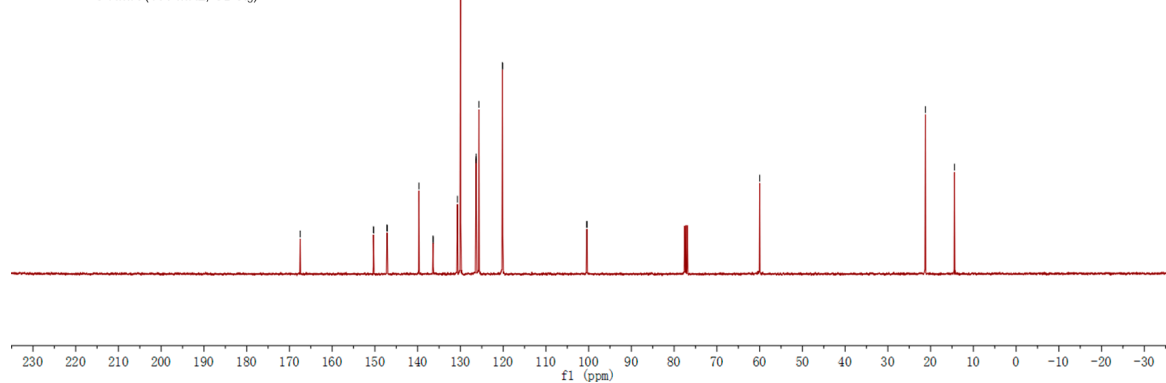

pdata/1

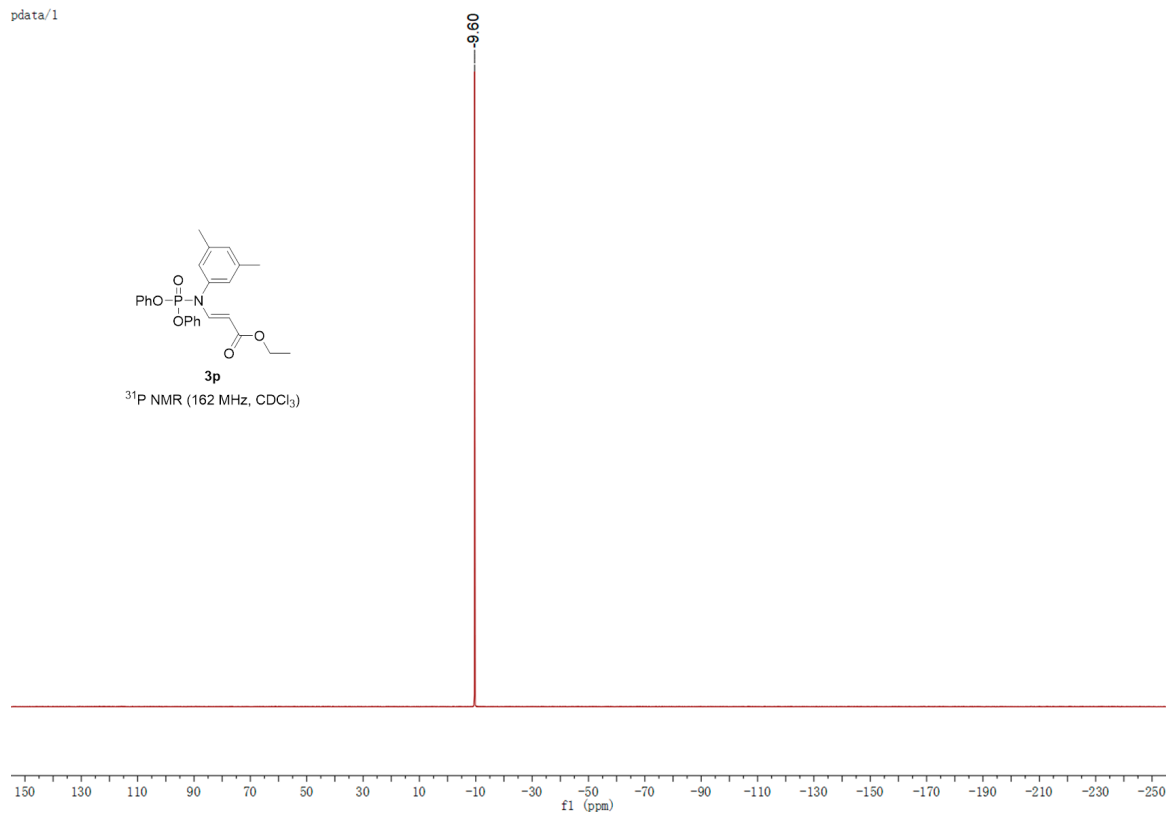

wg1188.1.1.1r

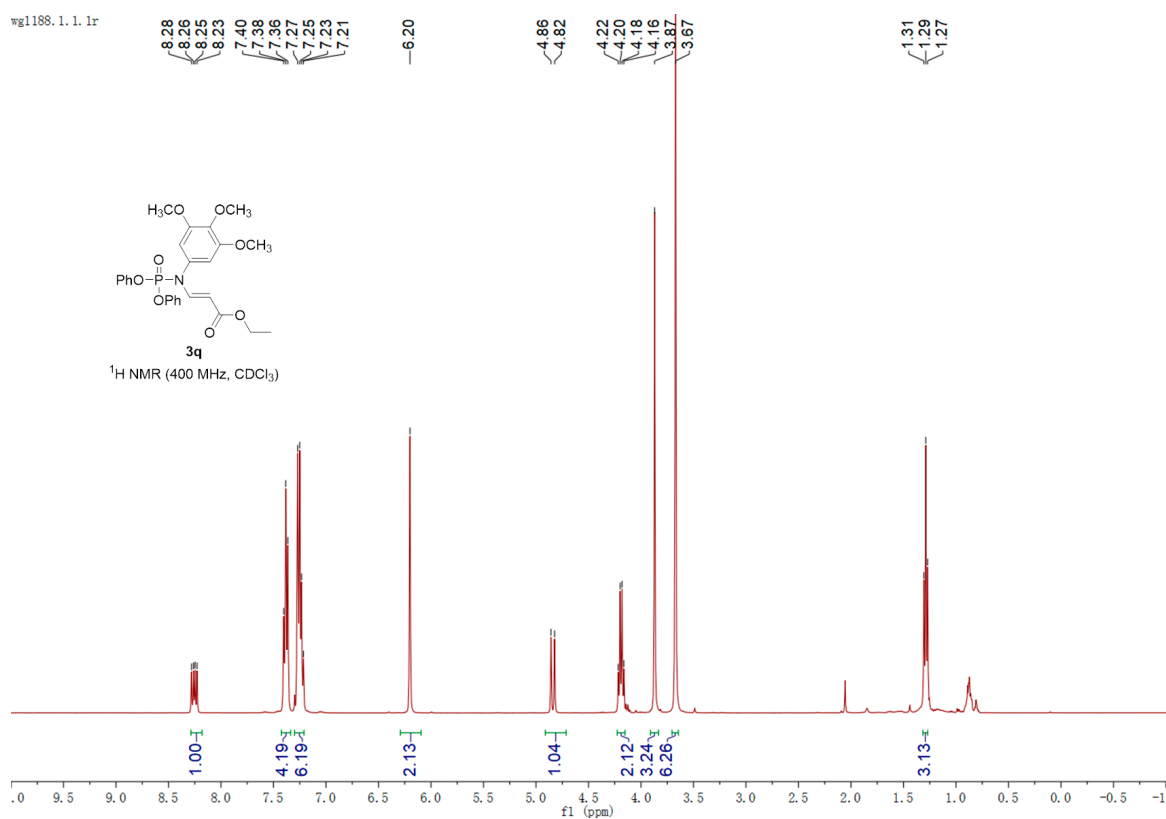



pdata/1

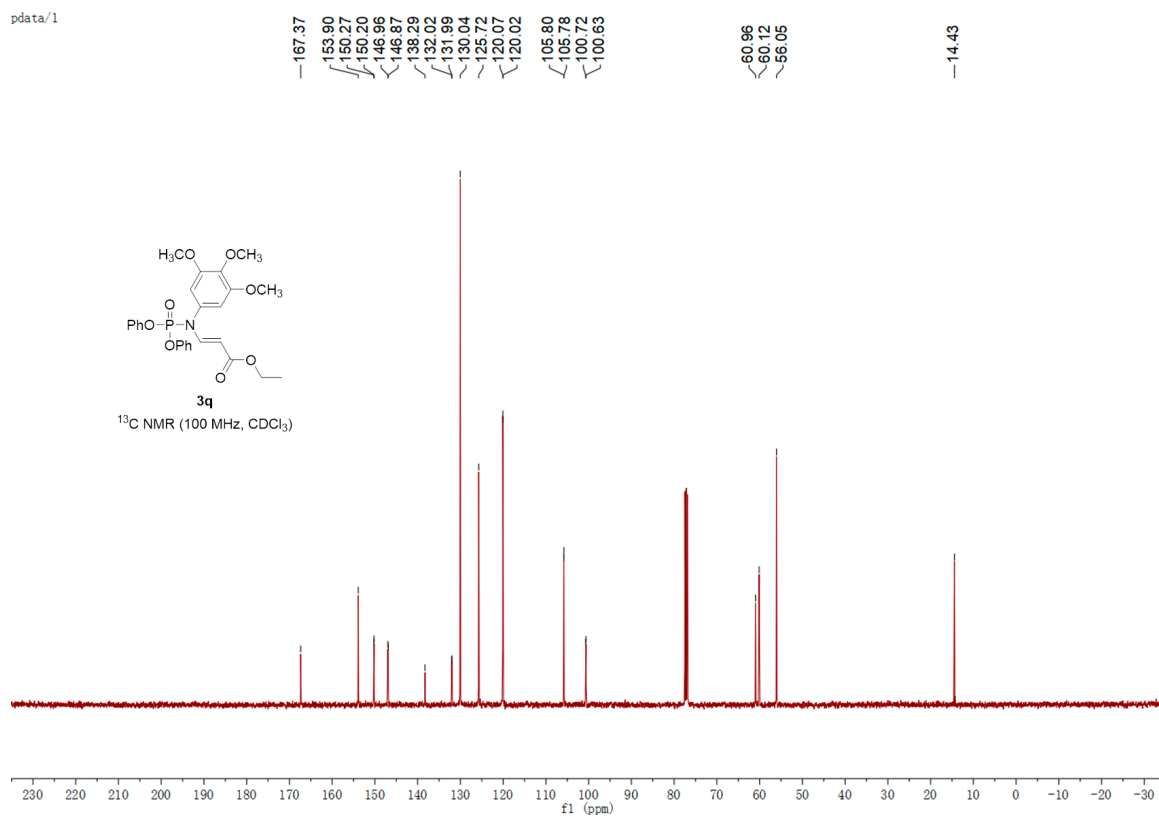

pdata/1

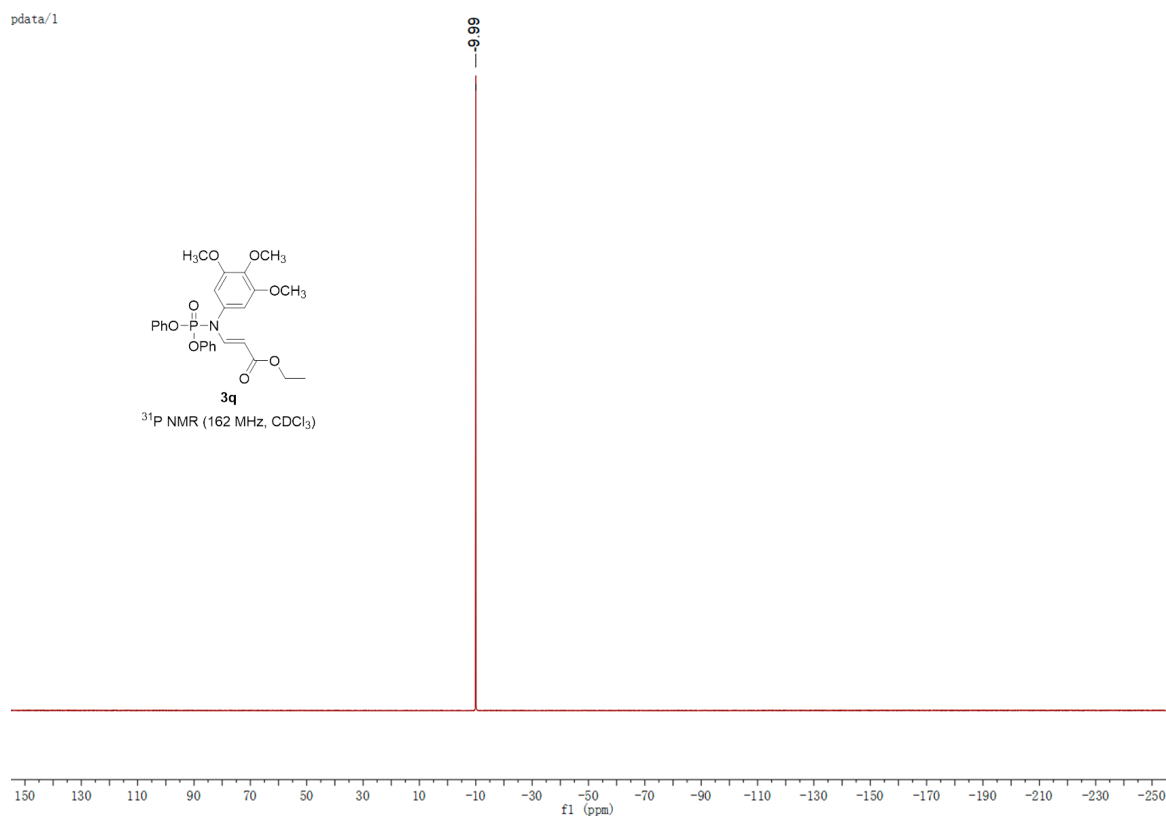

wg1197.1.1.1r

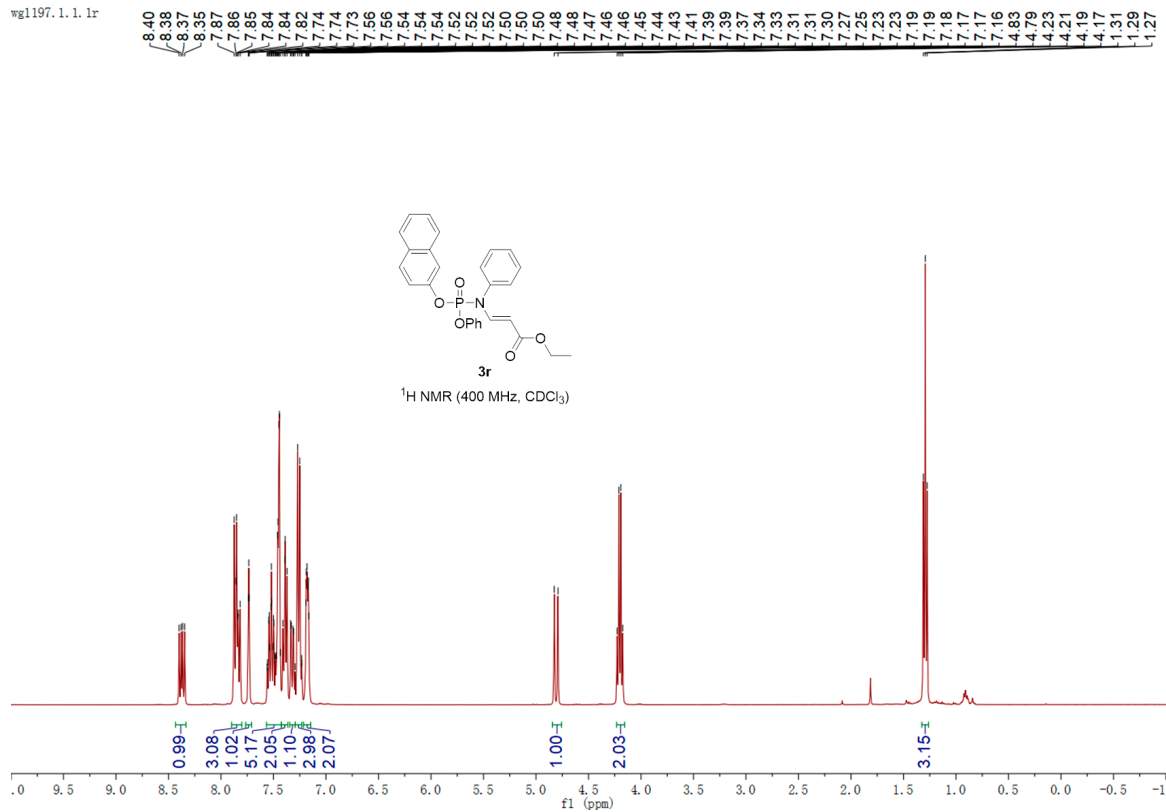

pdata/1

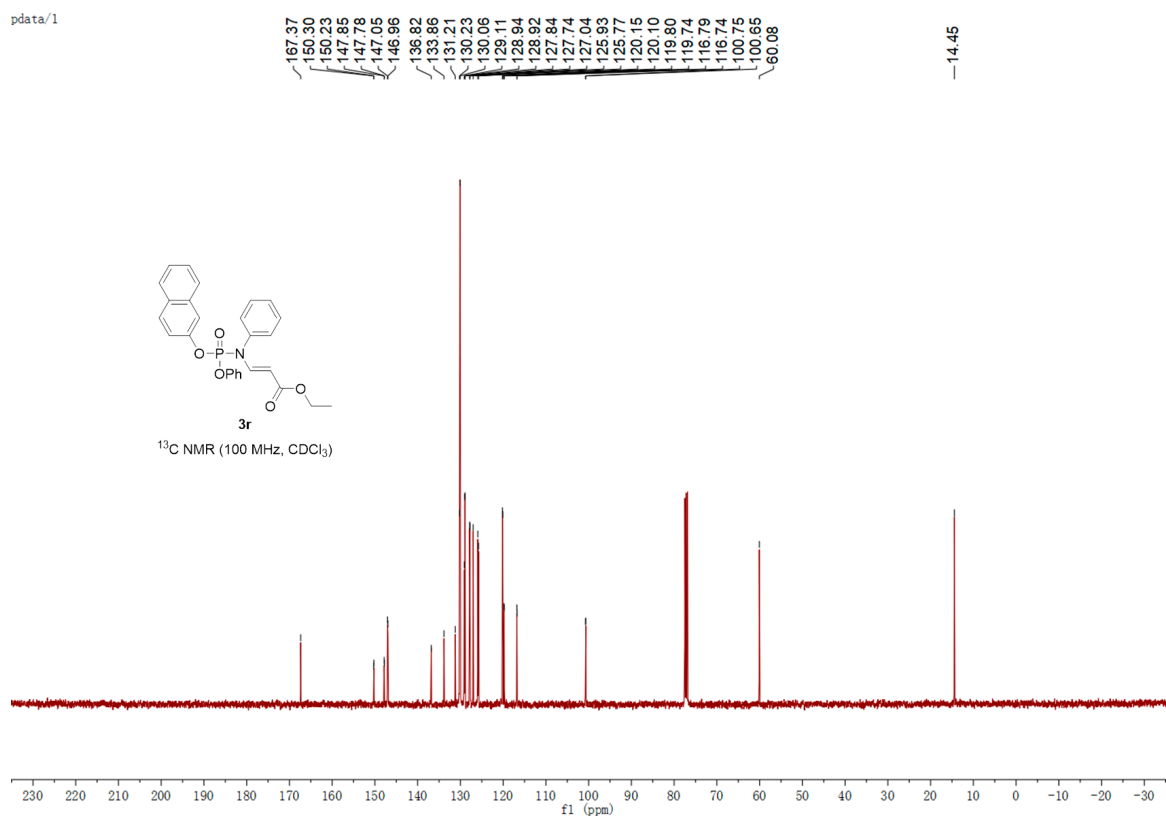

pdata/1

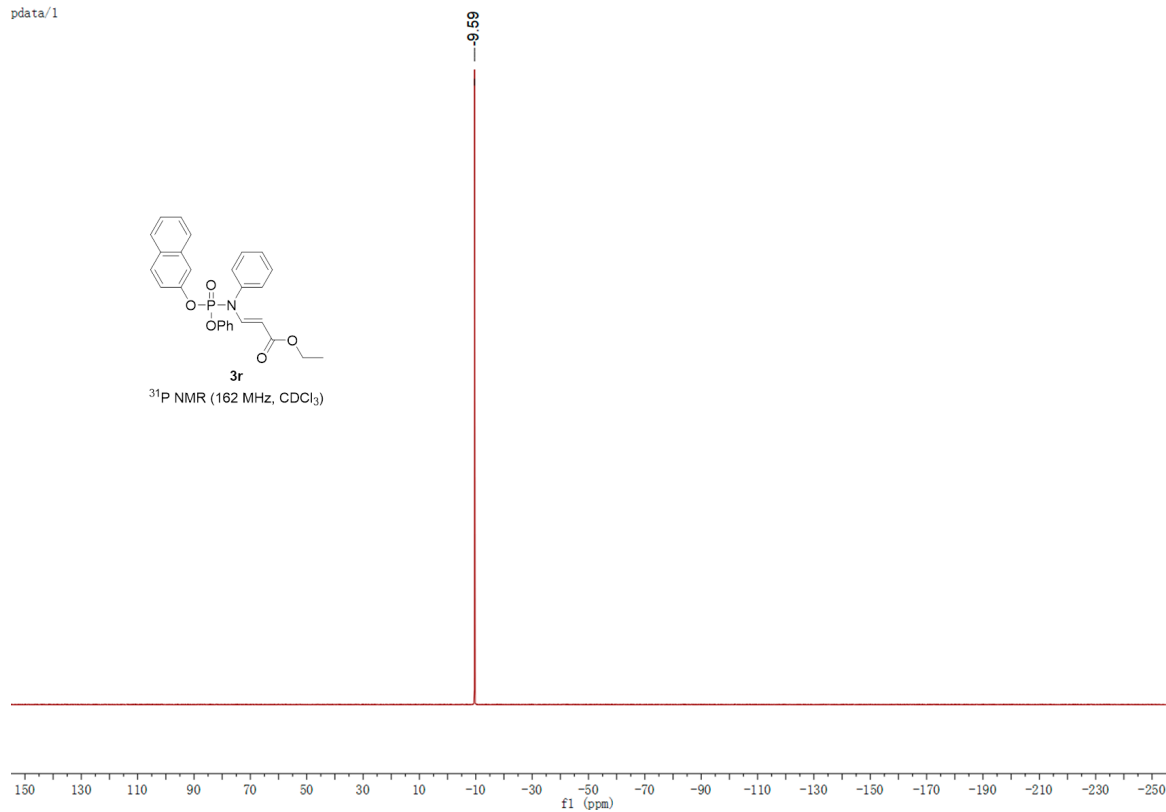

wg1198.1.1.1r

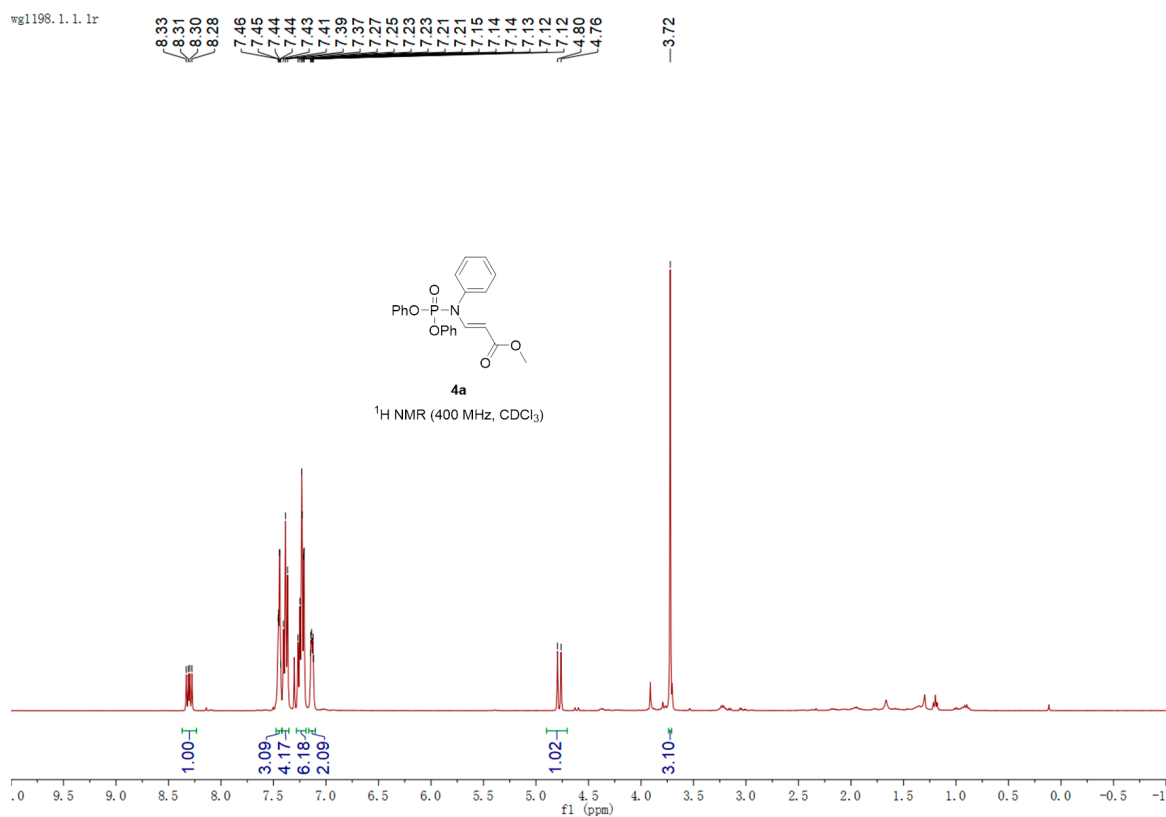

pdata/1

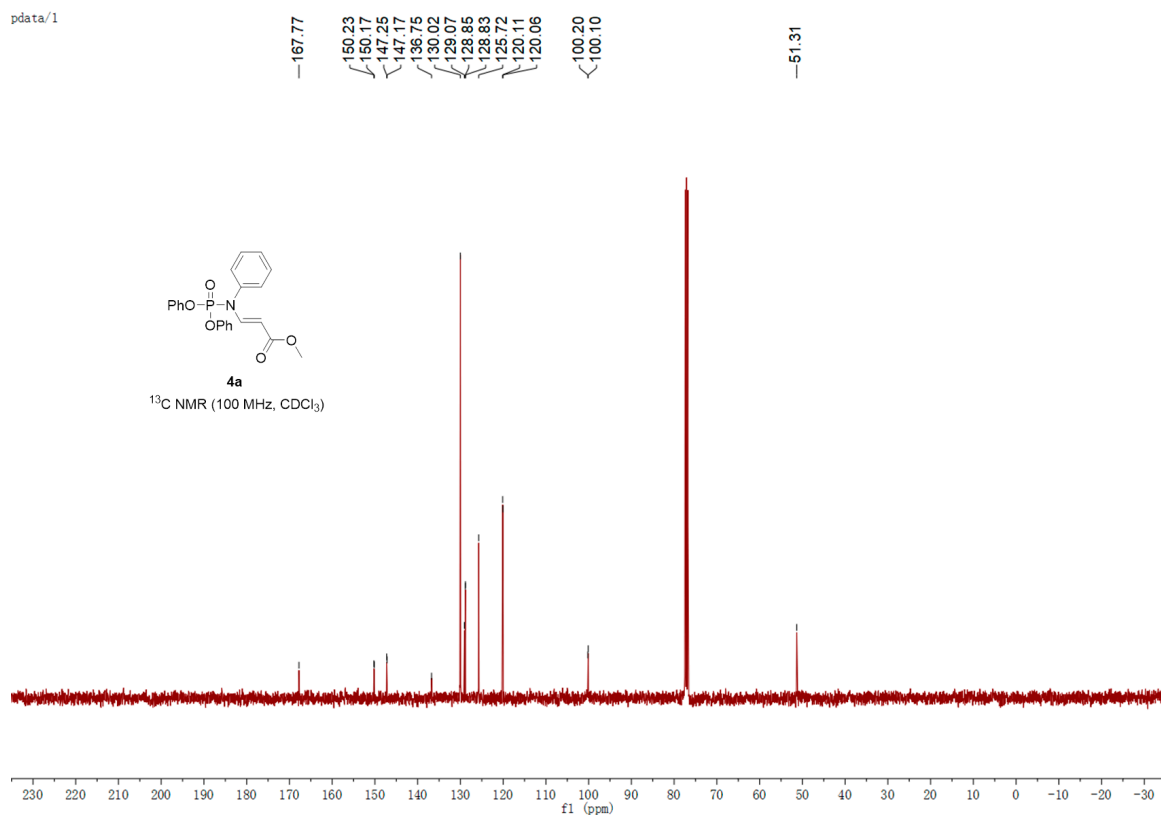

pdata/1

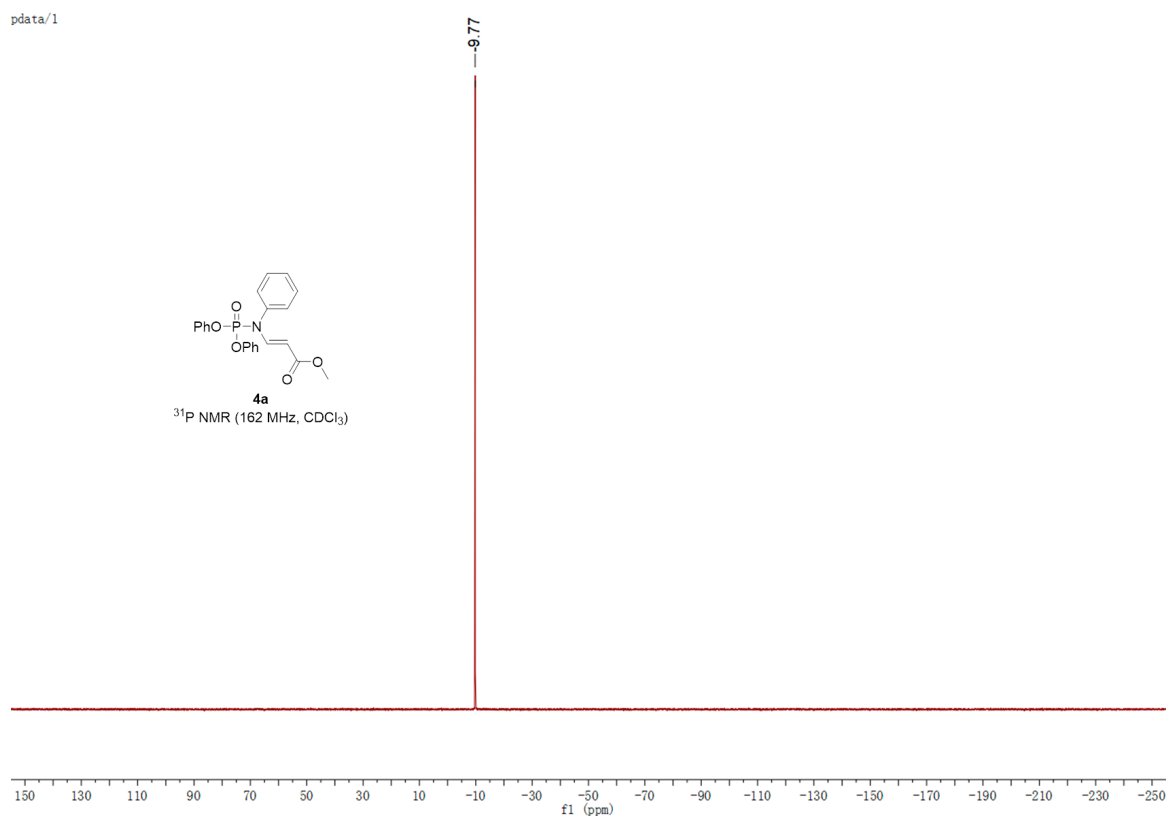

wg1200.1.1.1r

8.42  
8.40  
8.39  
8.36  
7.49  
7.48  
7.47  
7.41  
7.39  
7.37  
7.27  
7.26  
7.24  
7.22  
7.22  
7.20  
7.17  
7.16  
7.15  
7.15  
4.82  
4.78  
4.55  
4.52  
4.50  
4.48

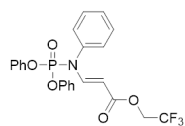

**4b**

<sup>1</sup>H NMR (400 MHz, CDCl<sub>3</sub>)

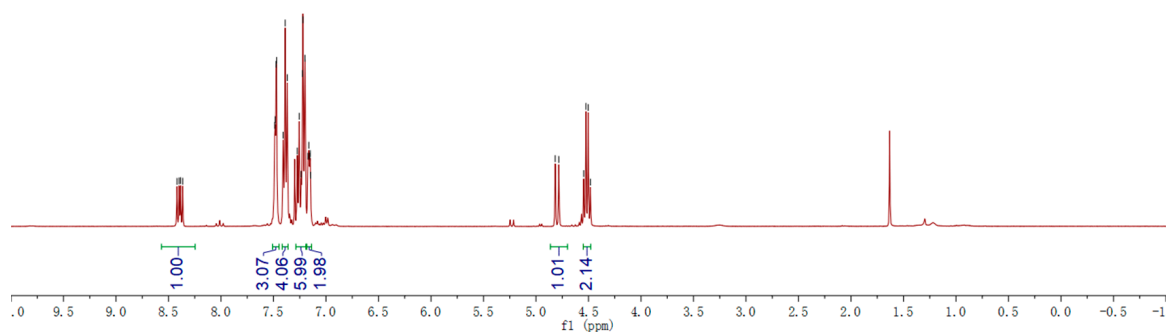

pdata/1

165.63  
150.16  
150.09  
149.20  
149.10  
136.46  
130.16  
130.06  
129.82  
129.33  
128.72  
125.83  
120.04  
119.99  
88.06  
87.96  
60.12  
59.76  
59.40

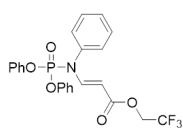

**4b**

<sup>13</sup>C NMR (100 MHz, CDCl<sub>3</sub>)

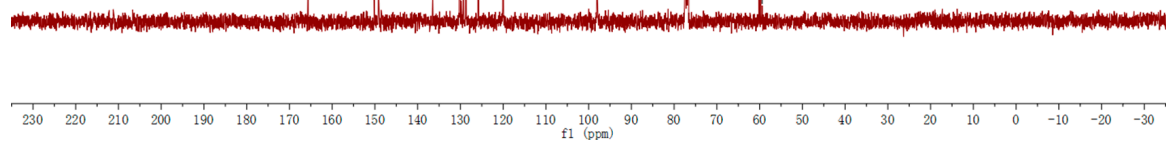

pdata/1

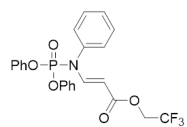

**4b**

$^{19}\text{F}$  NMR (375 MHz,  $\text{CDCl}_3$ )

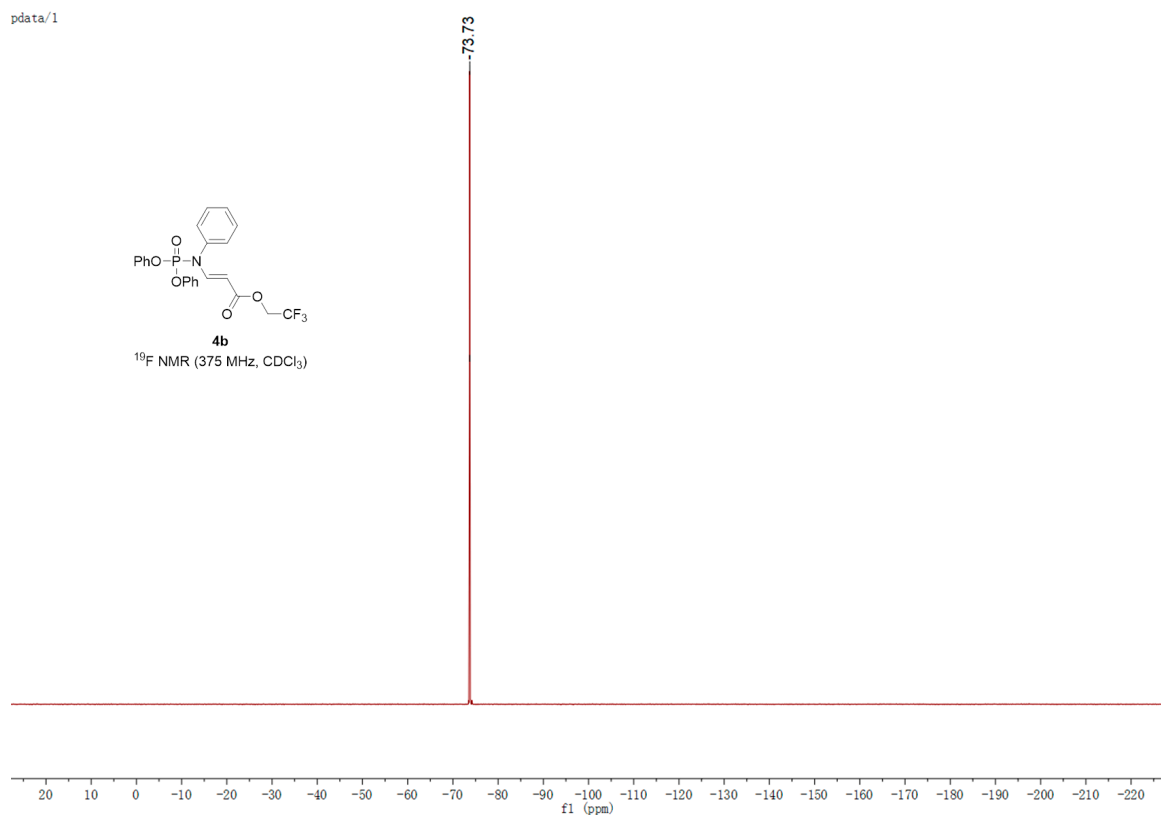

pdata/1

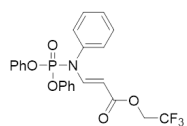

**4b**

$^{31}\text{P}$  NMR (162 MHz,  $\text{CDCl}_3$ )

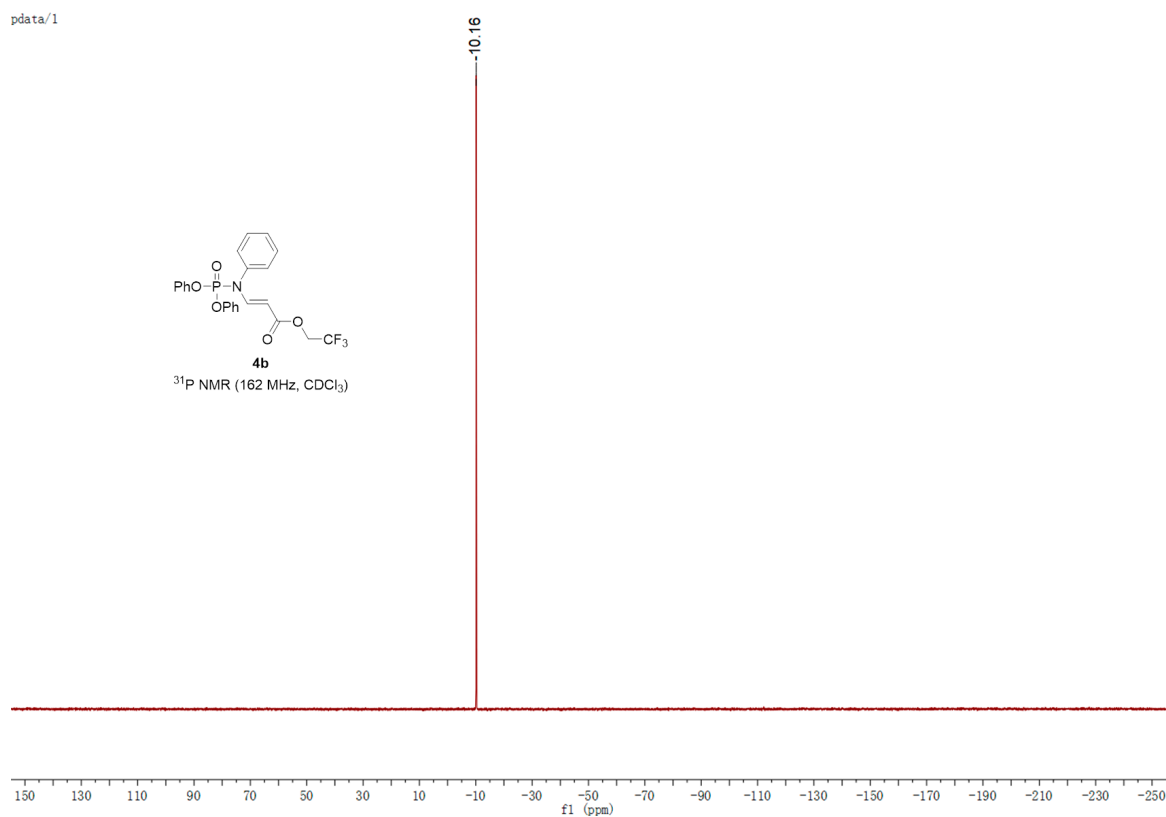

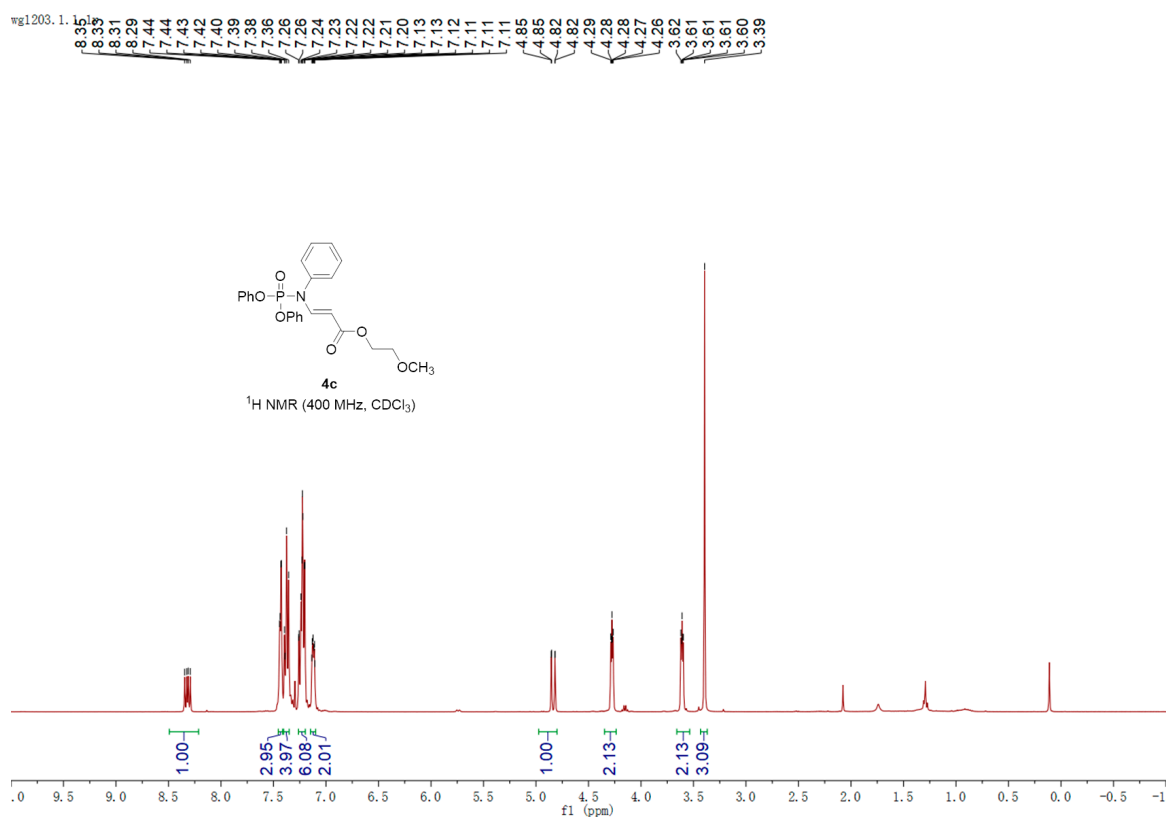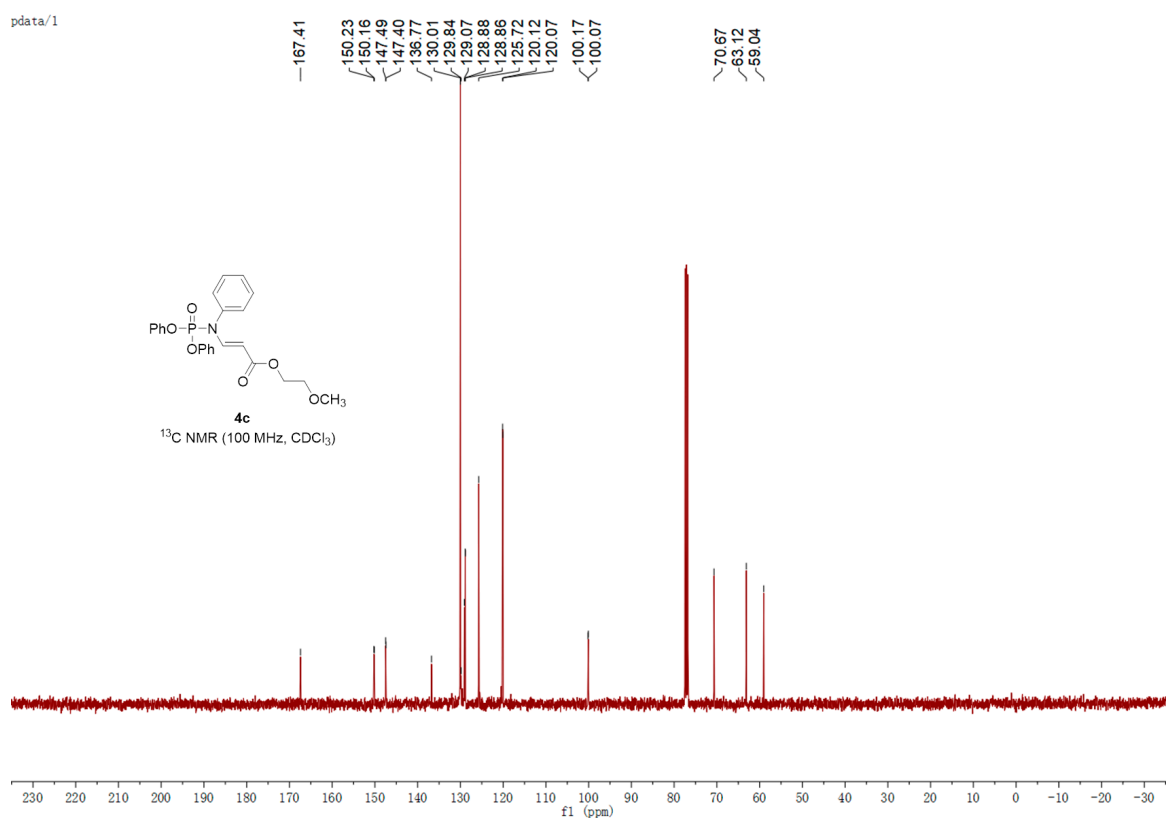

pdata/1

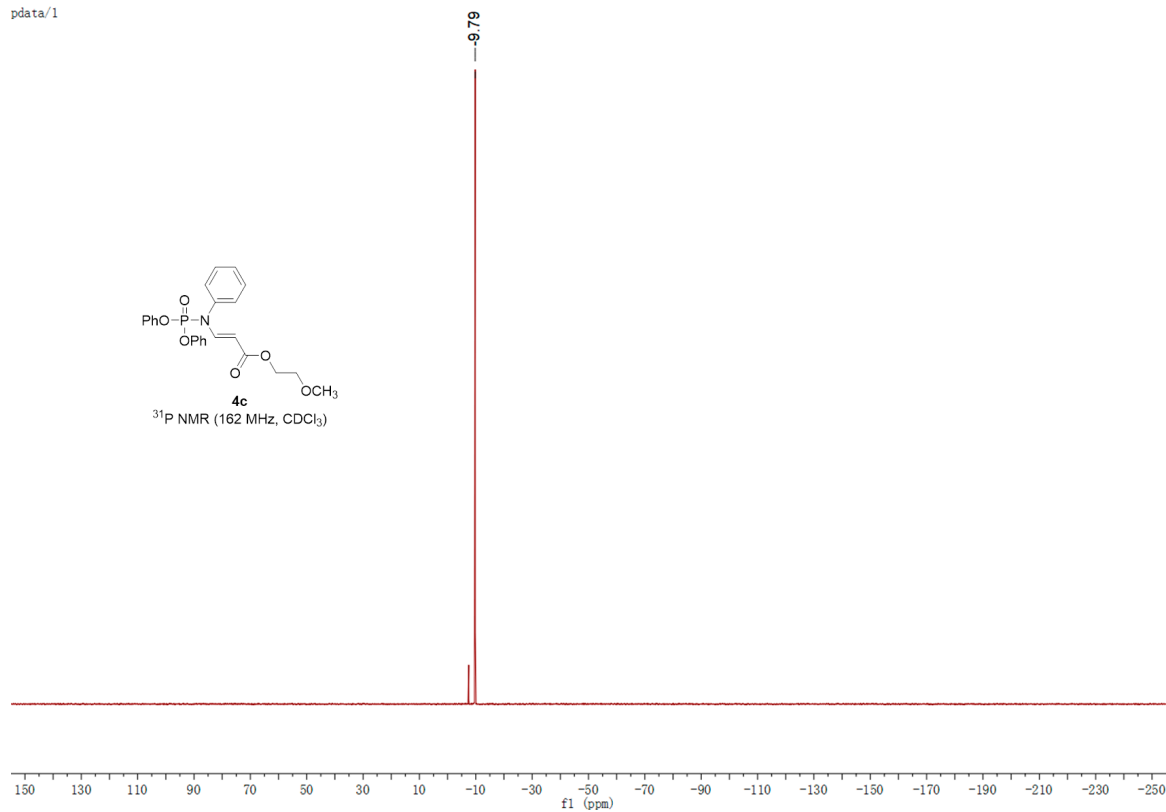

wg1201.1.1.1r

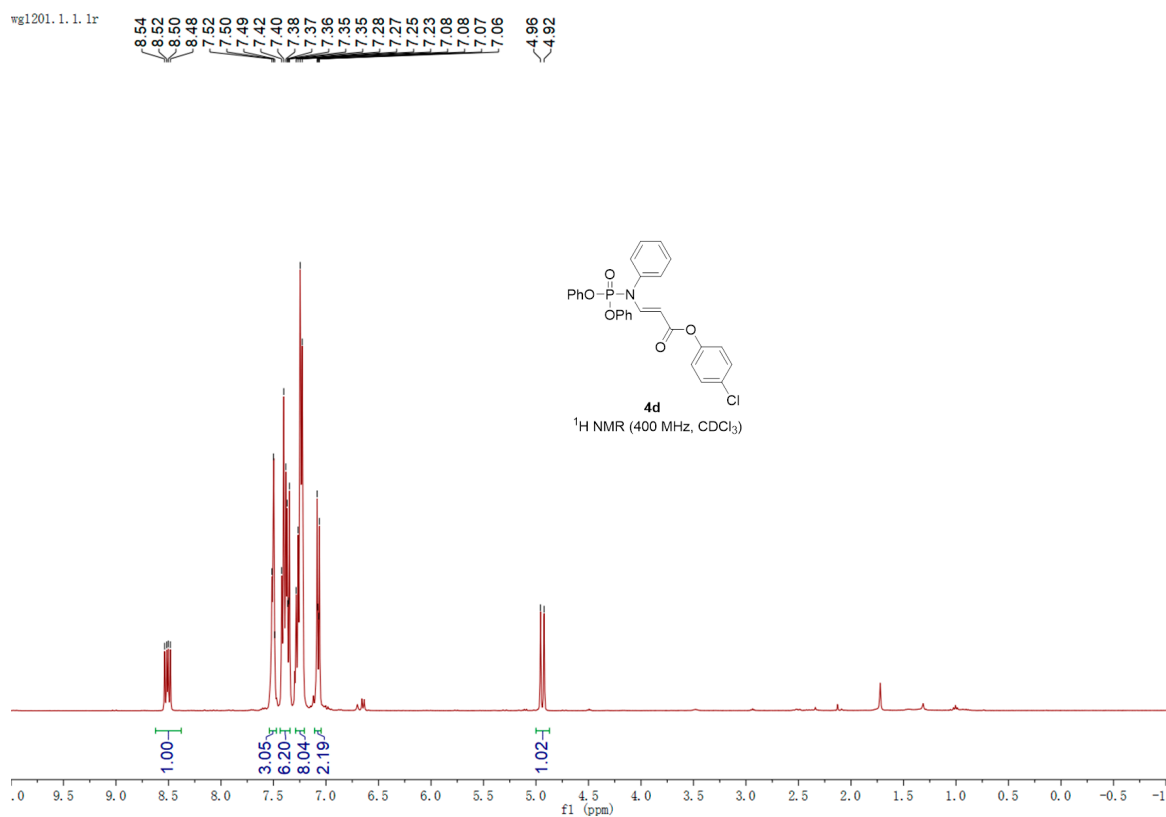



pdata/1

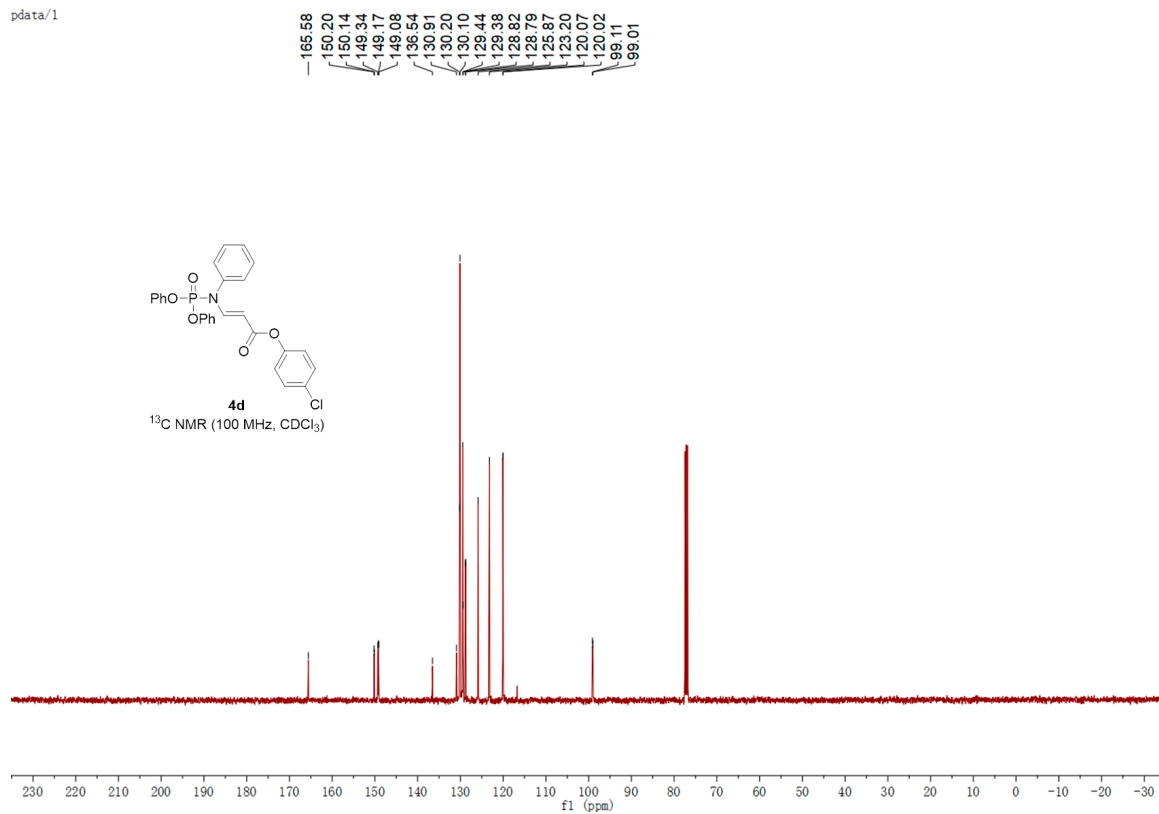

pdata/1

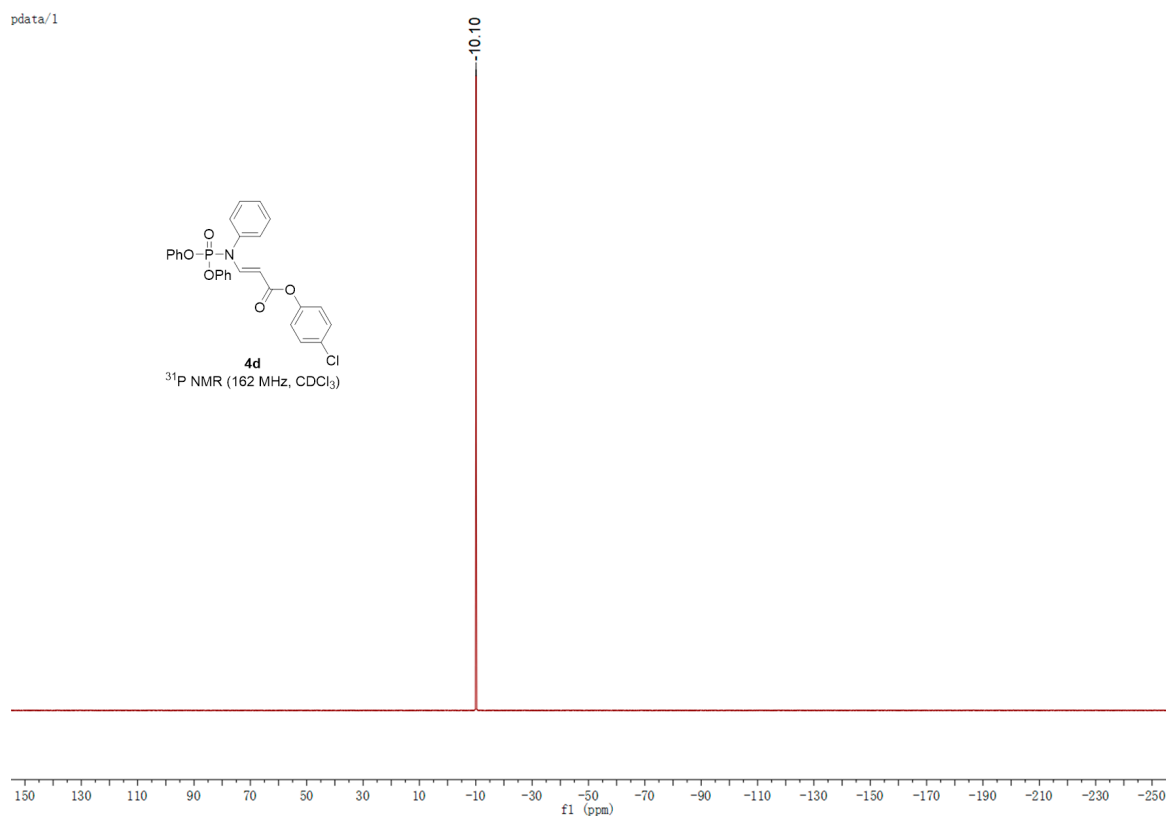

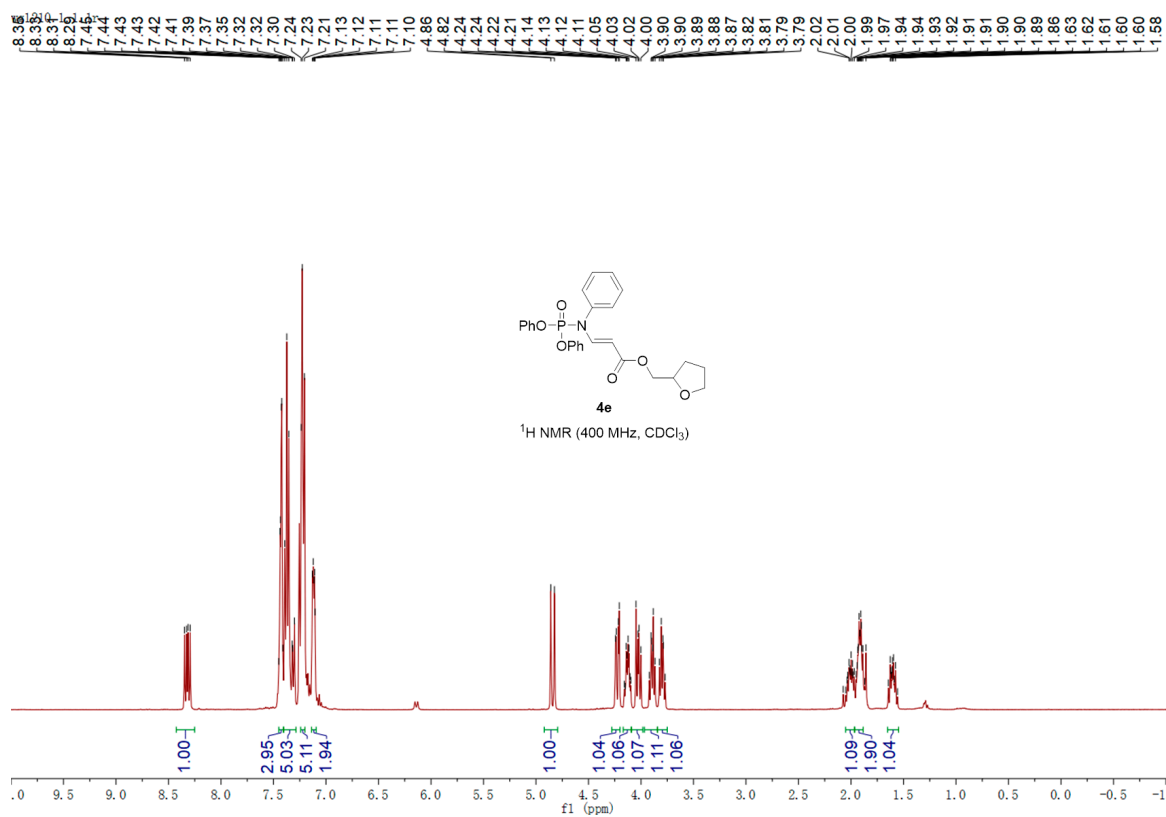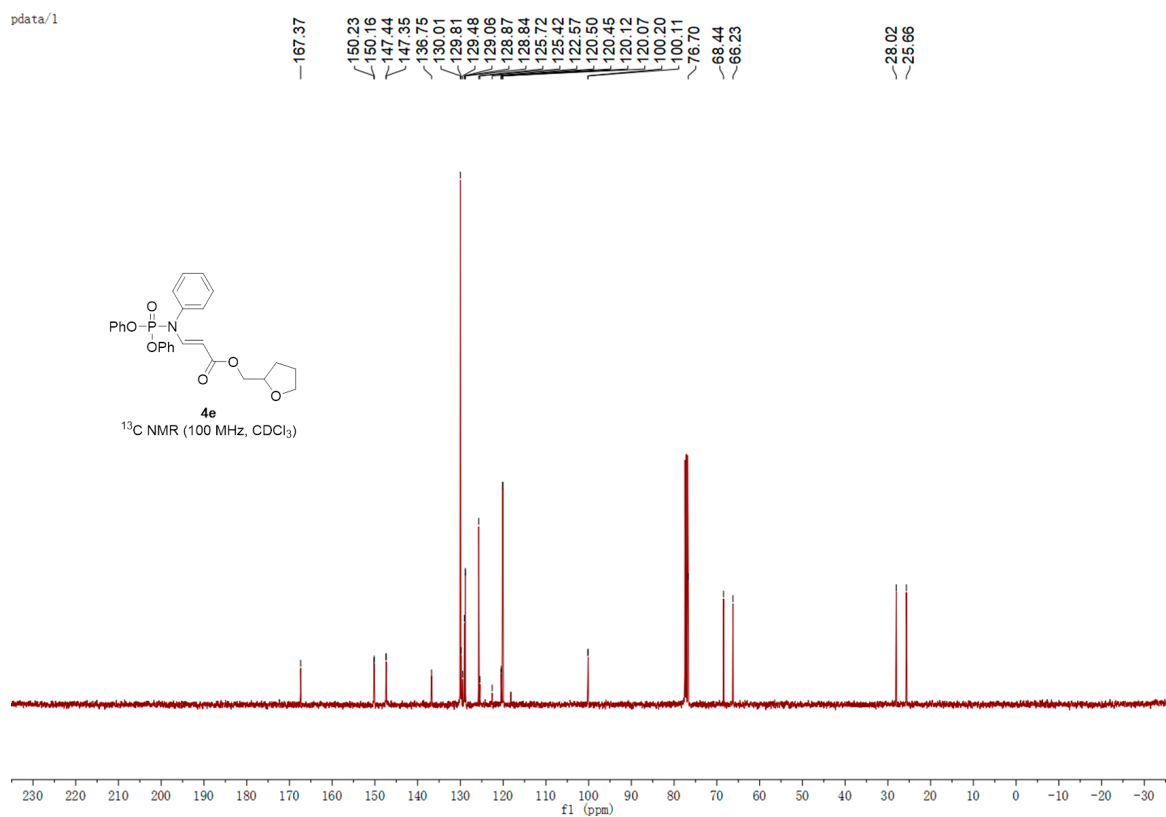

pdata/1

9.77

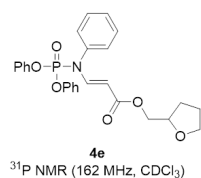

wg1207.1.1.1r

8.55  
8.53  
8.51  
8.49  
7.53  
7.53  
7.52  
7.50  
7.50  
7.49  
7.48  
7.42  
7.40  
7.38  
7.28  
7.26  
7.25  
7.25  
7.24  
7.24  
7.23  
7.09  
7.08  
7.07  
5.01  
4.98

2.18

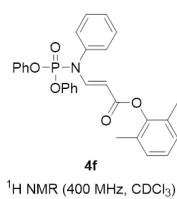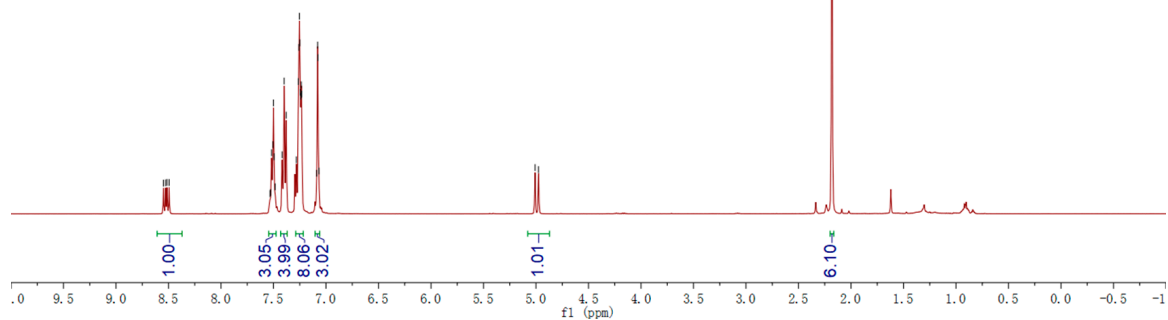

pdata/1

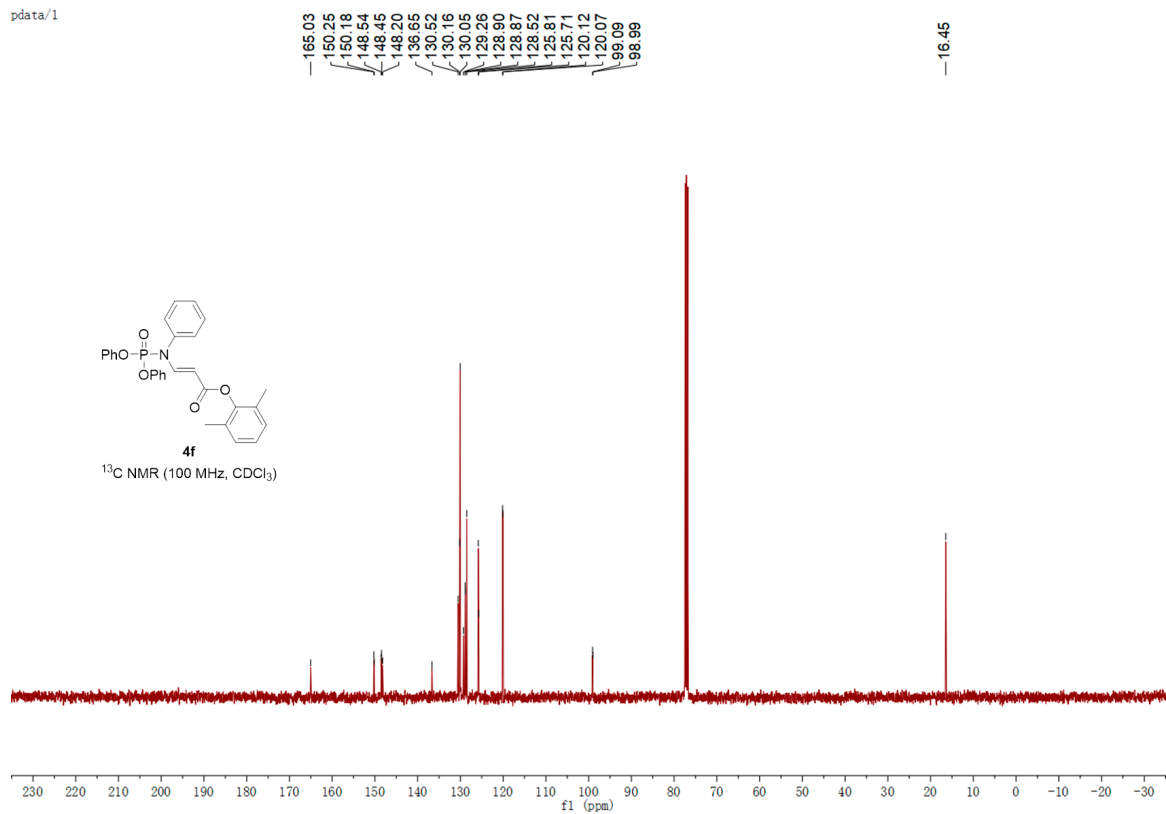

pdata/1

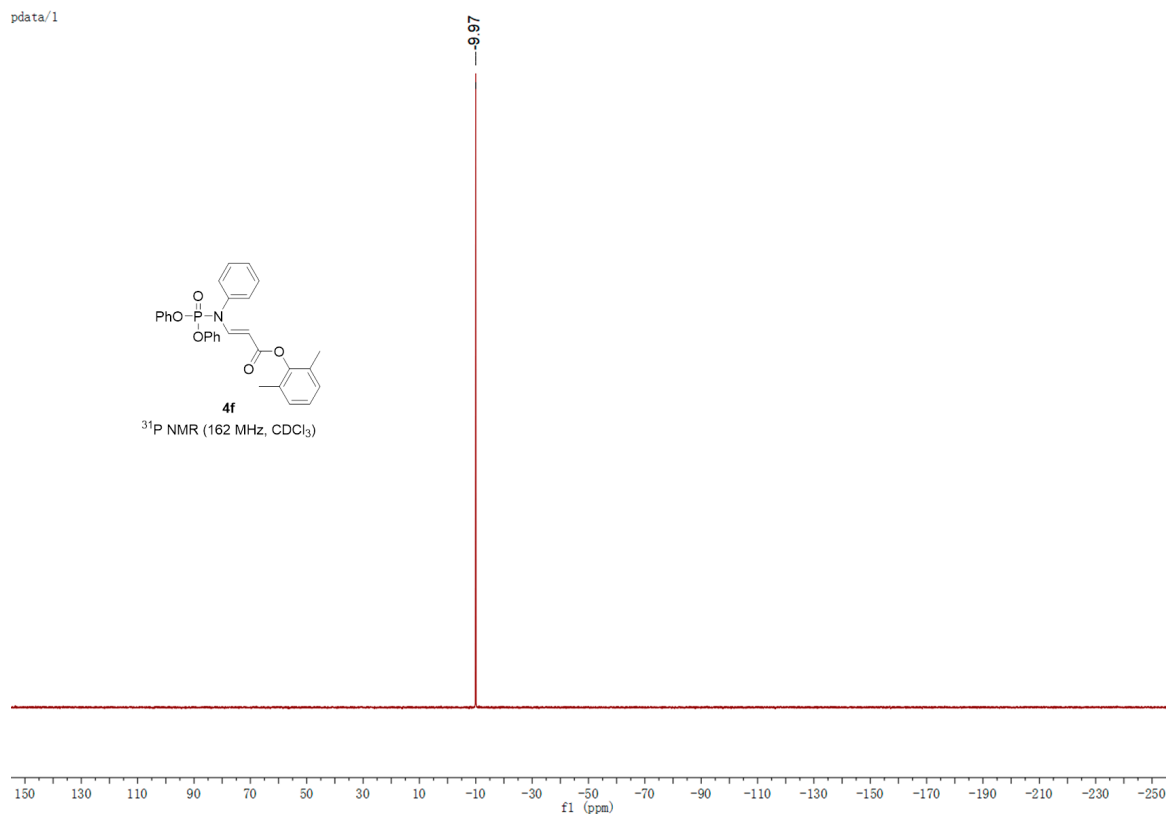

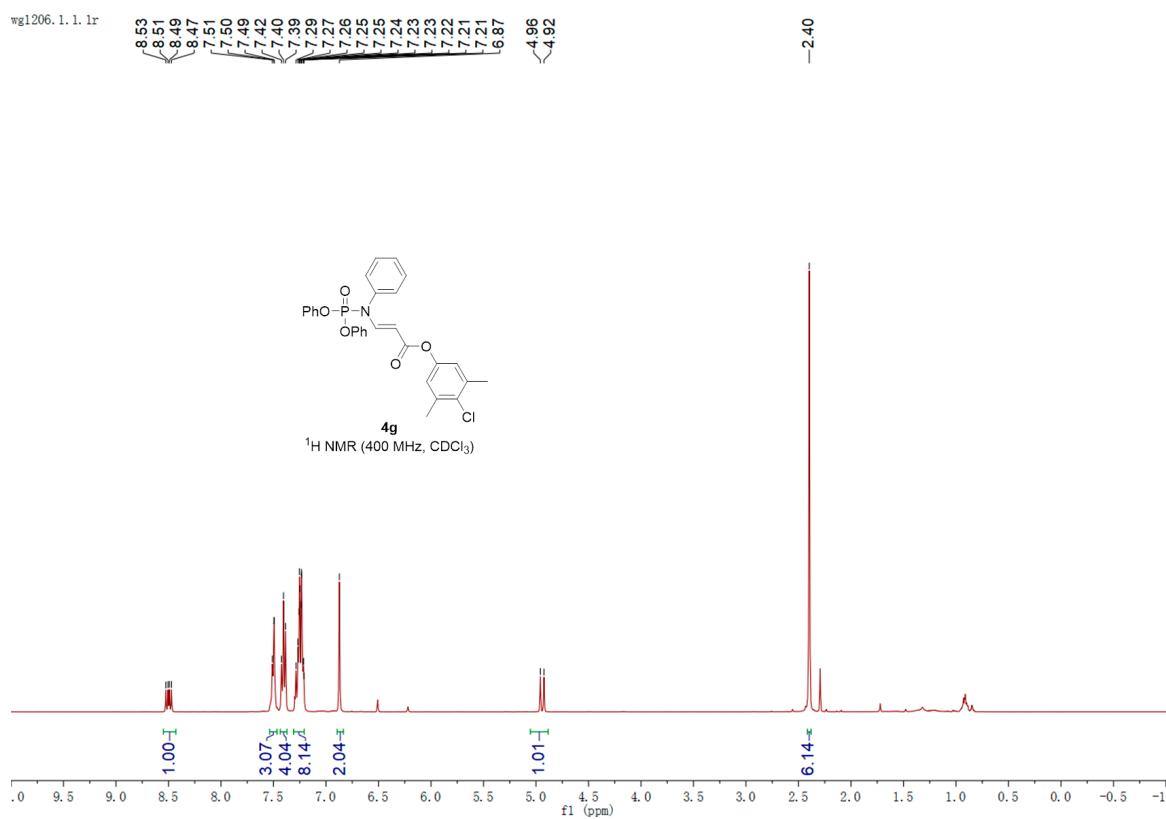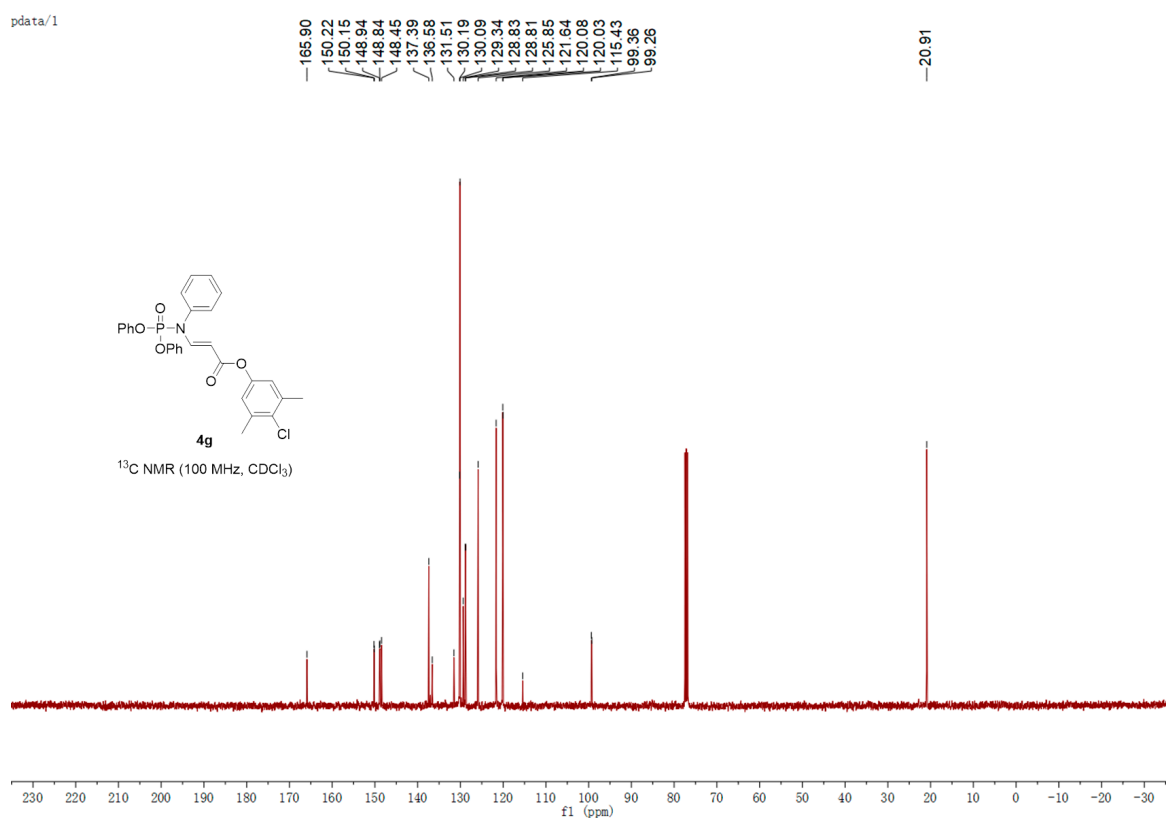

pdata/1

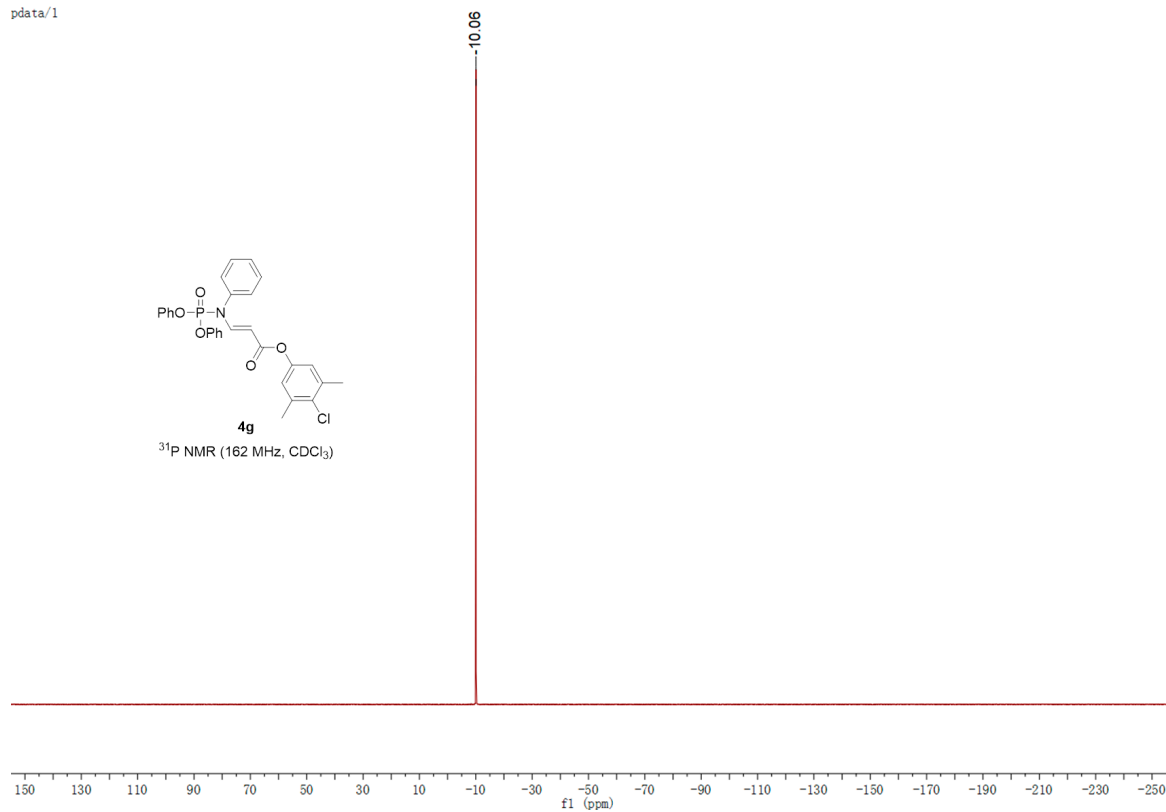

wg1209. 1. 1. 1r

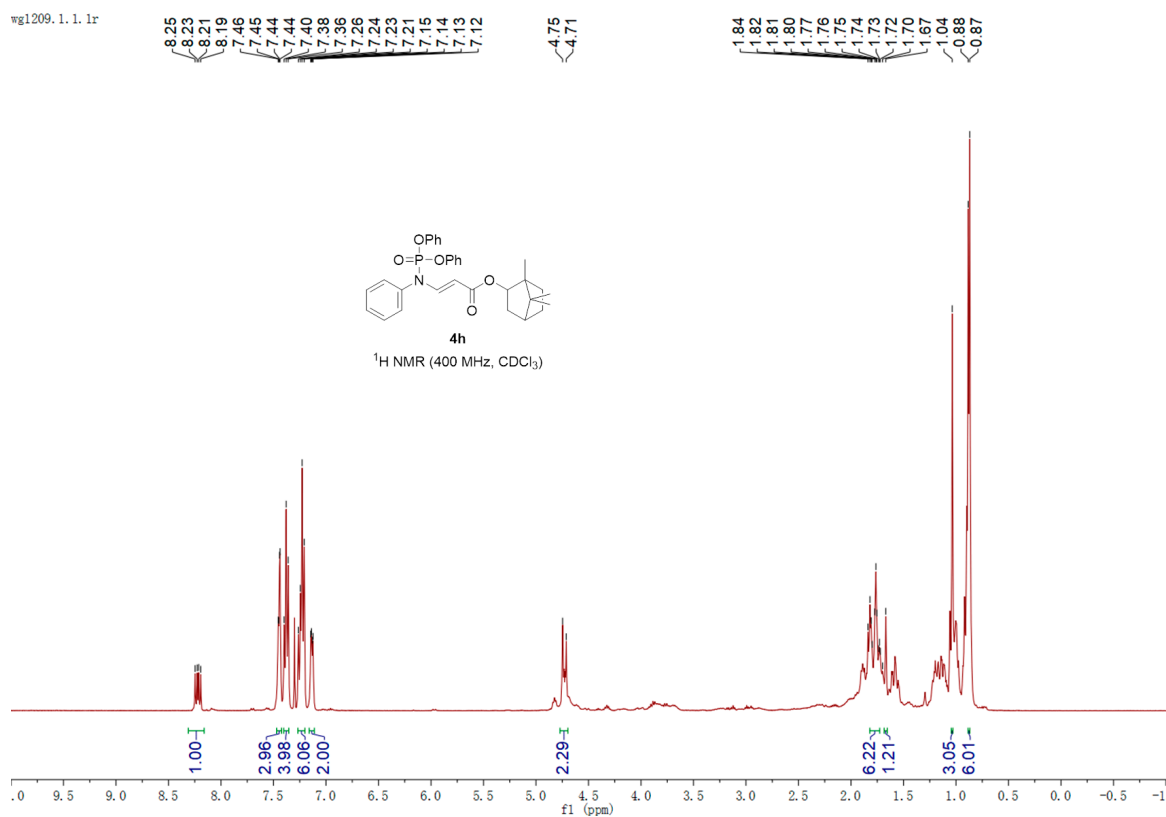

pdata/1

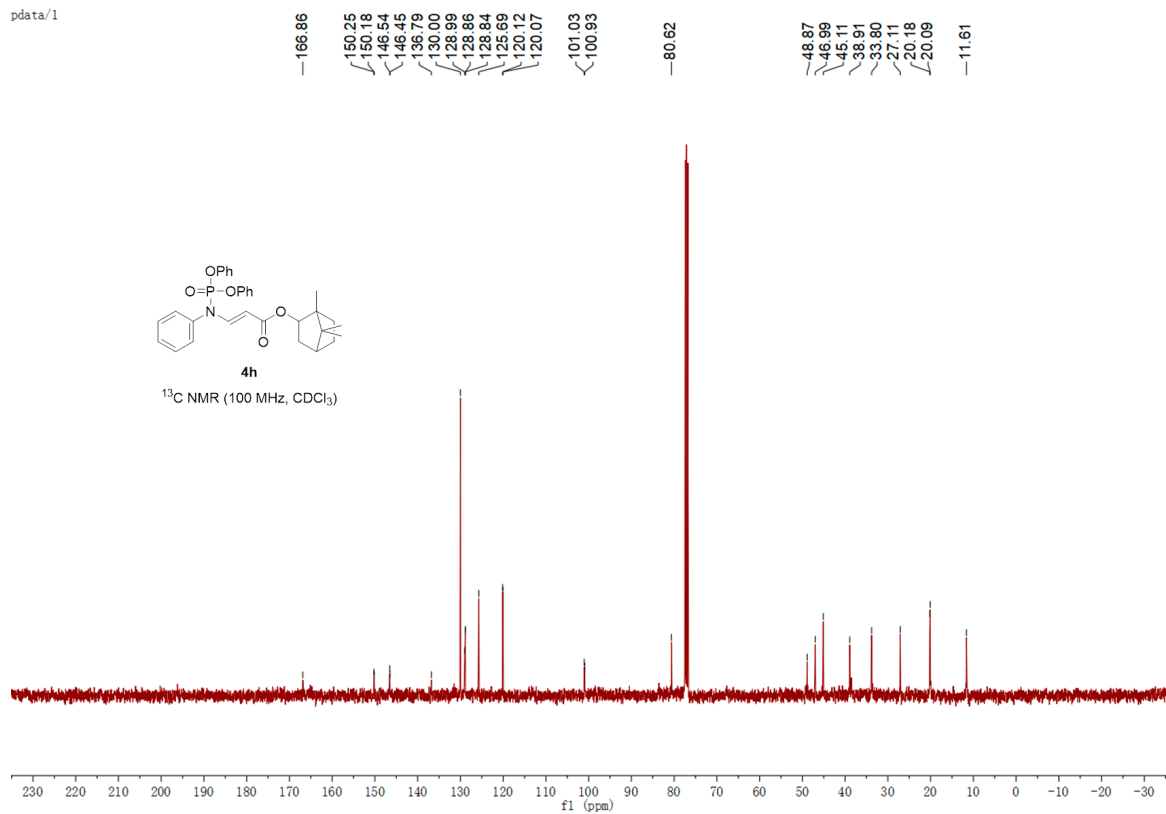

pdata/1

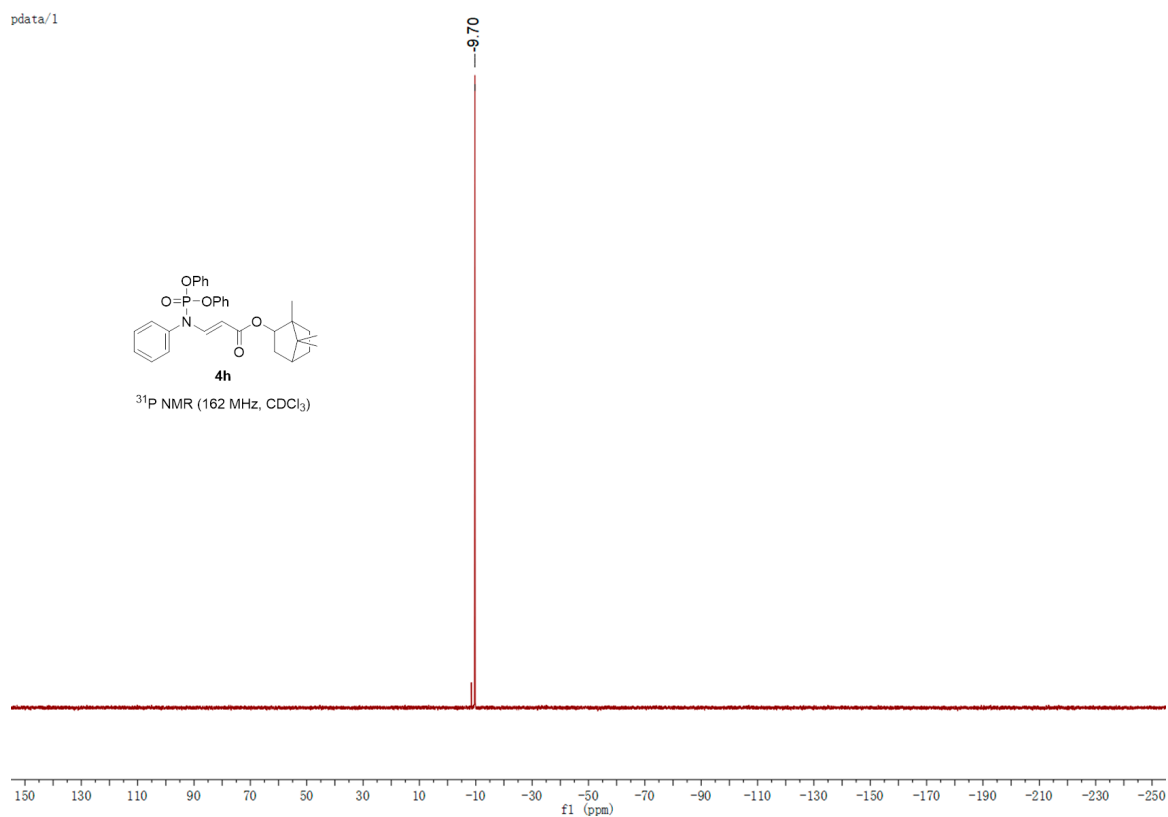

wg1204.1.1.1r

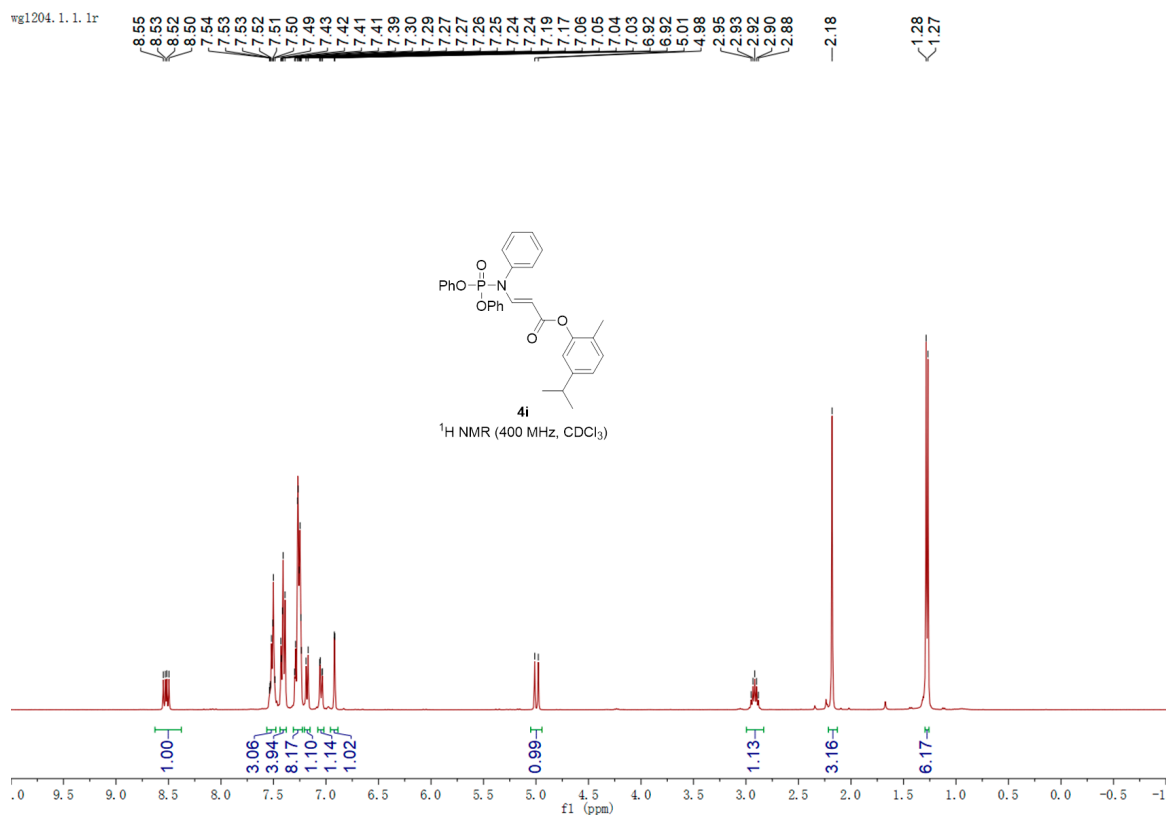

pdata/1

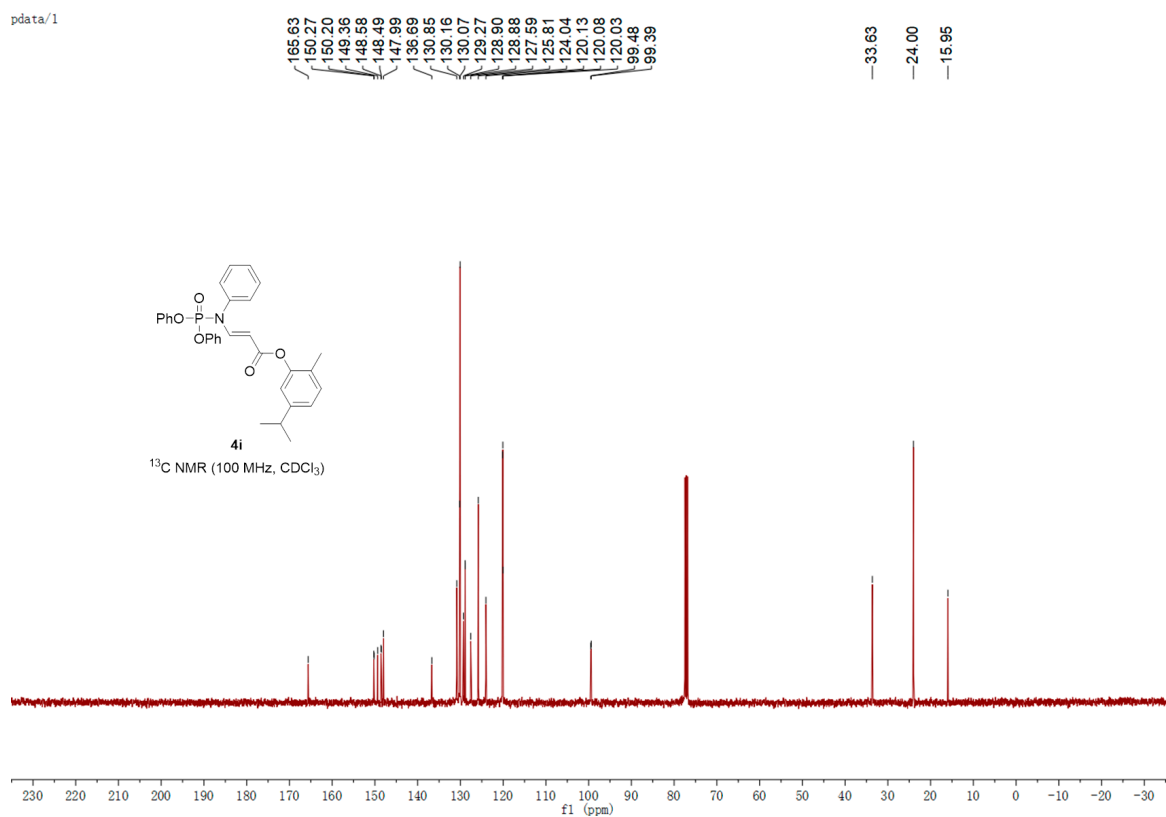



pdata/1

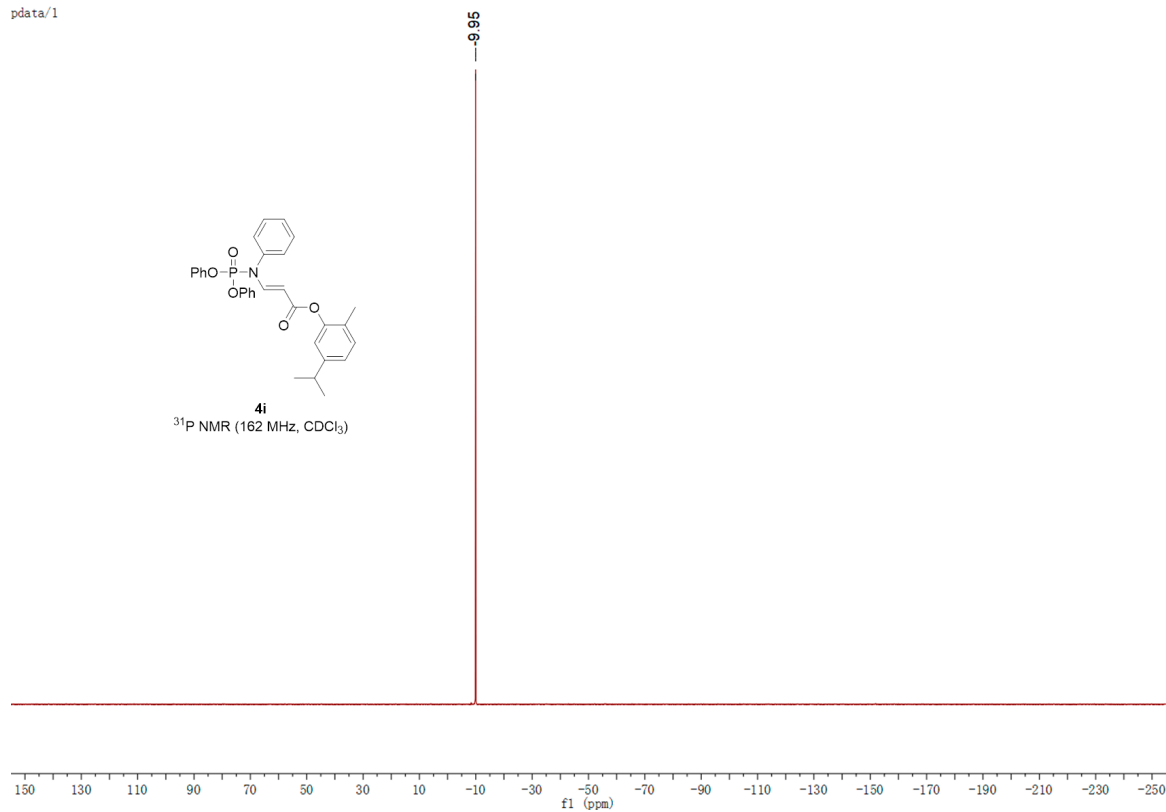

wg1202.1.1.1r

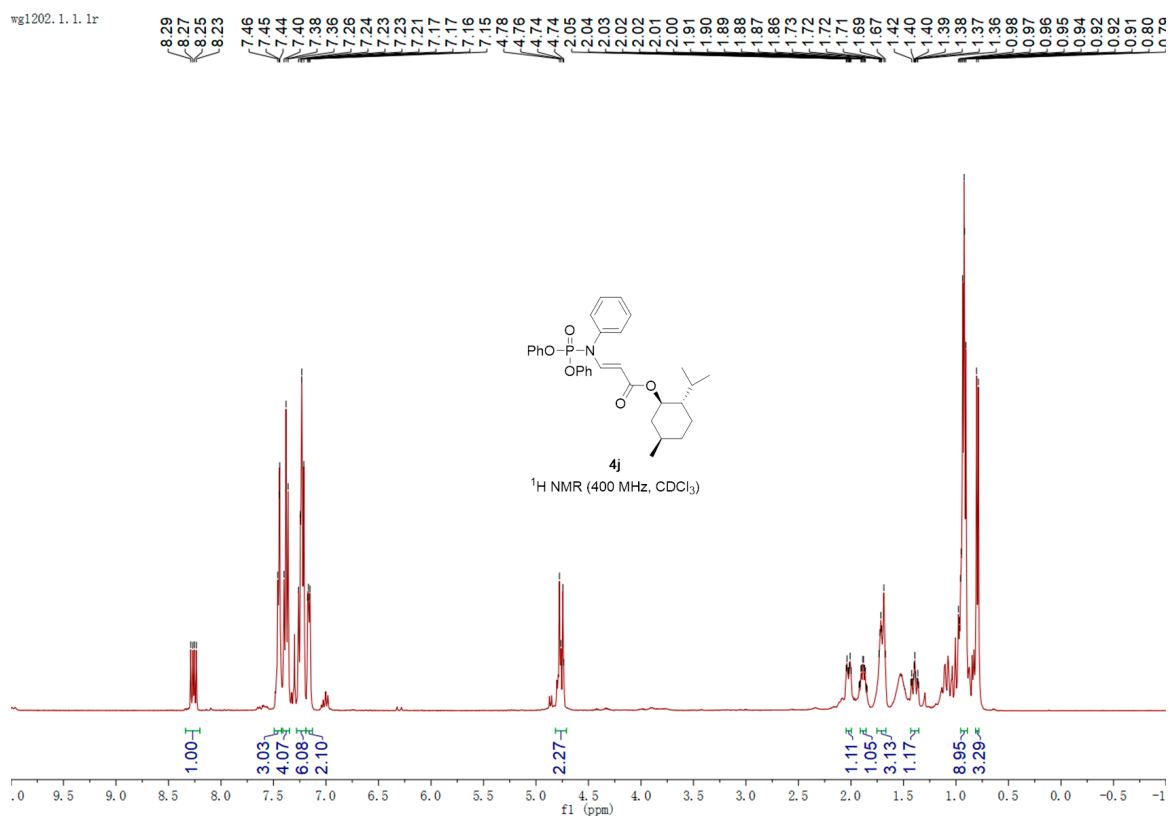

pdata/1

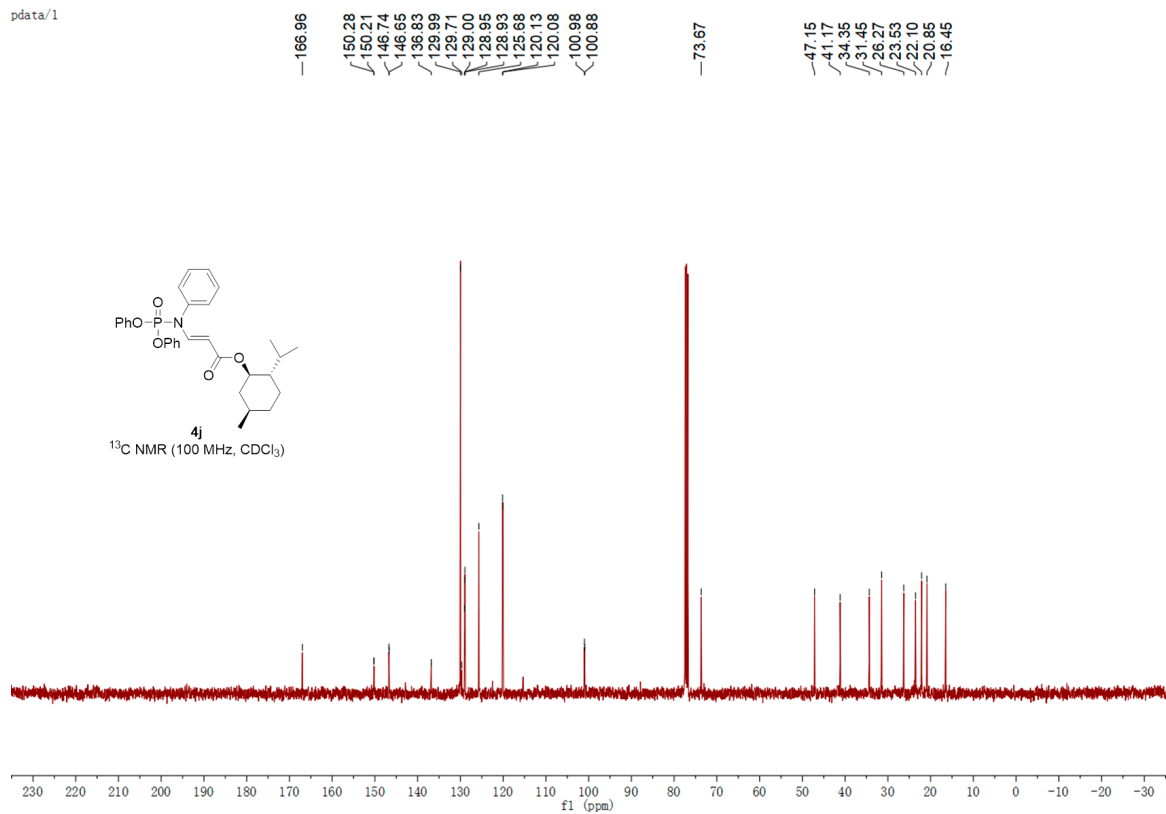

pdata/1

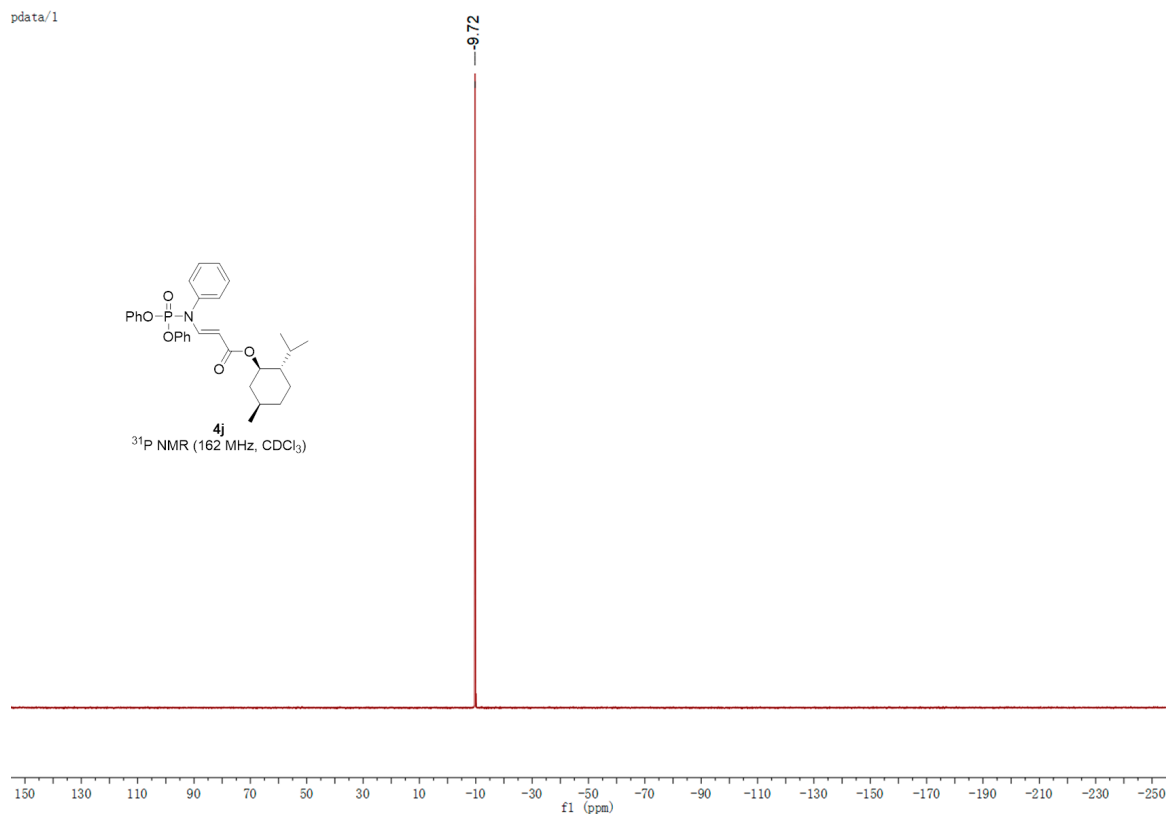

wg1199.1.1.1r

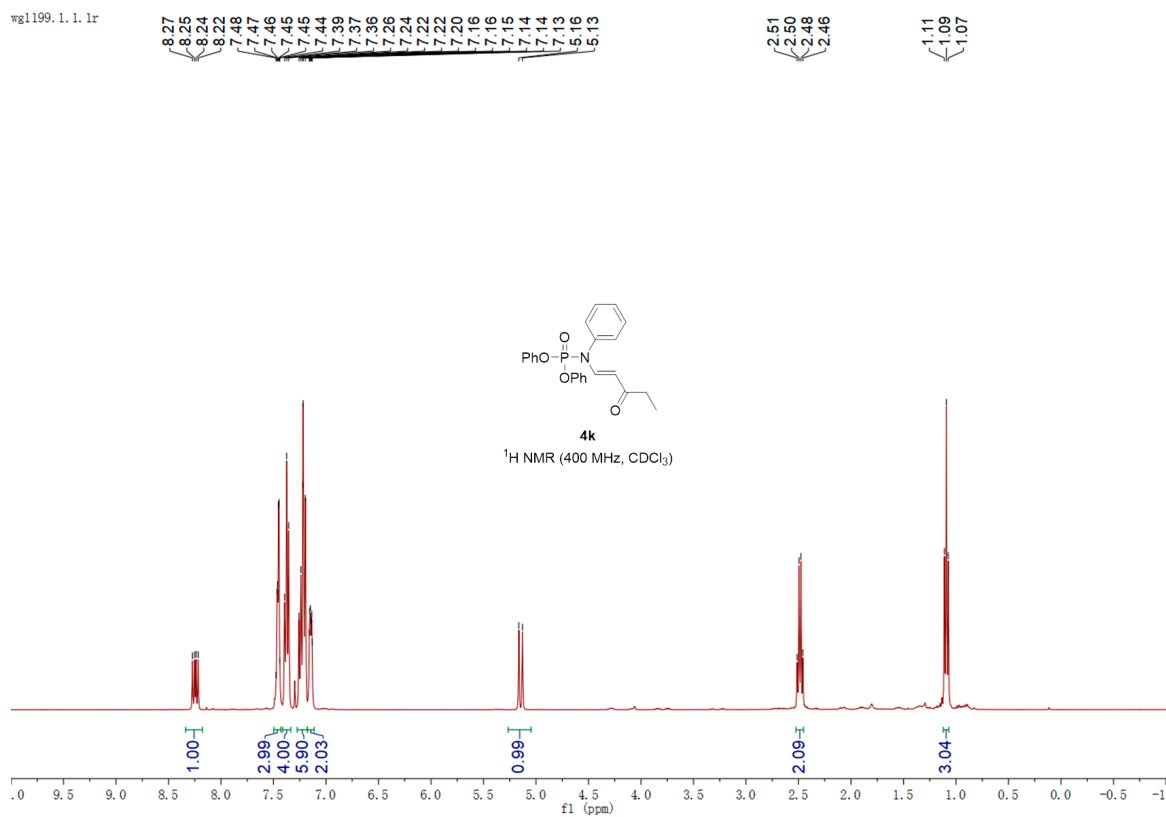

pdata/1

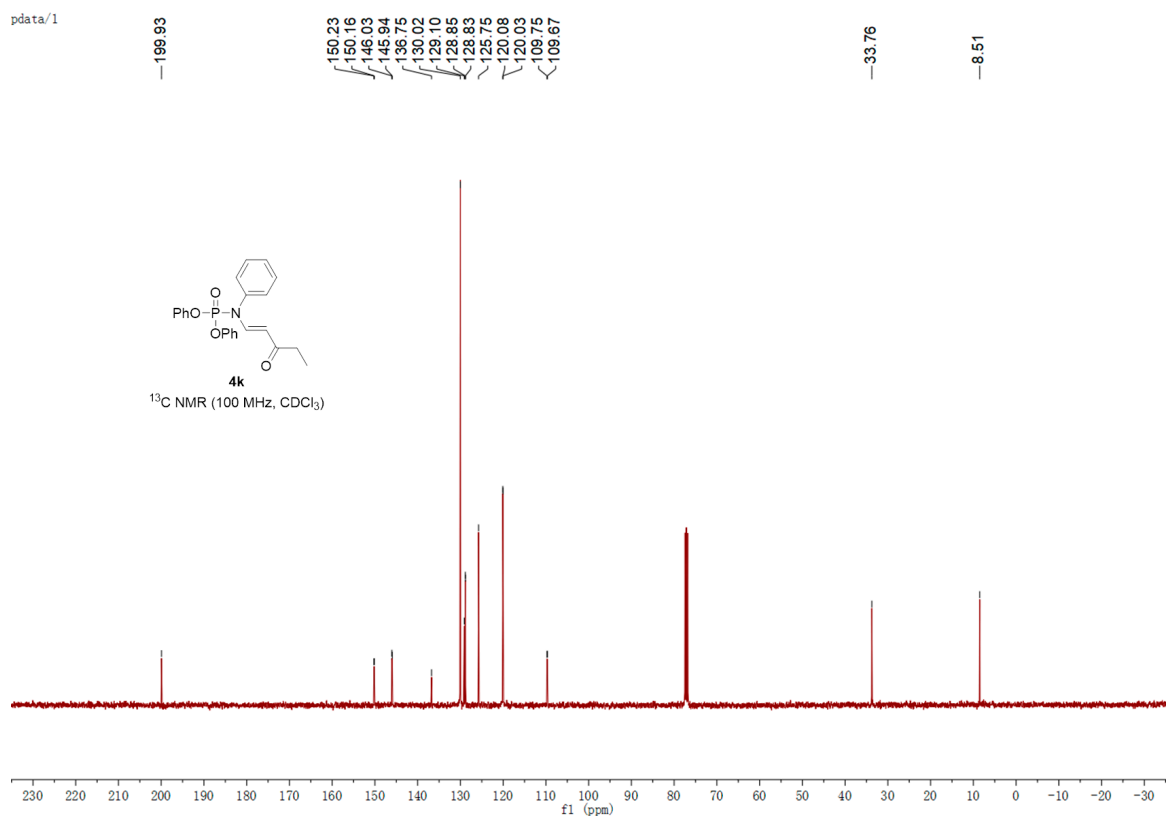

pdata/1

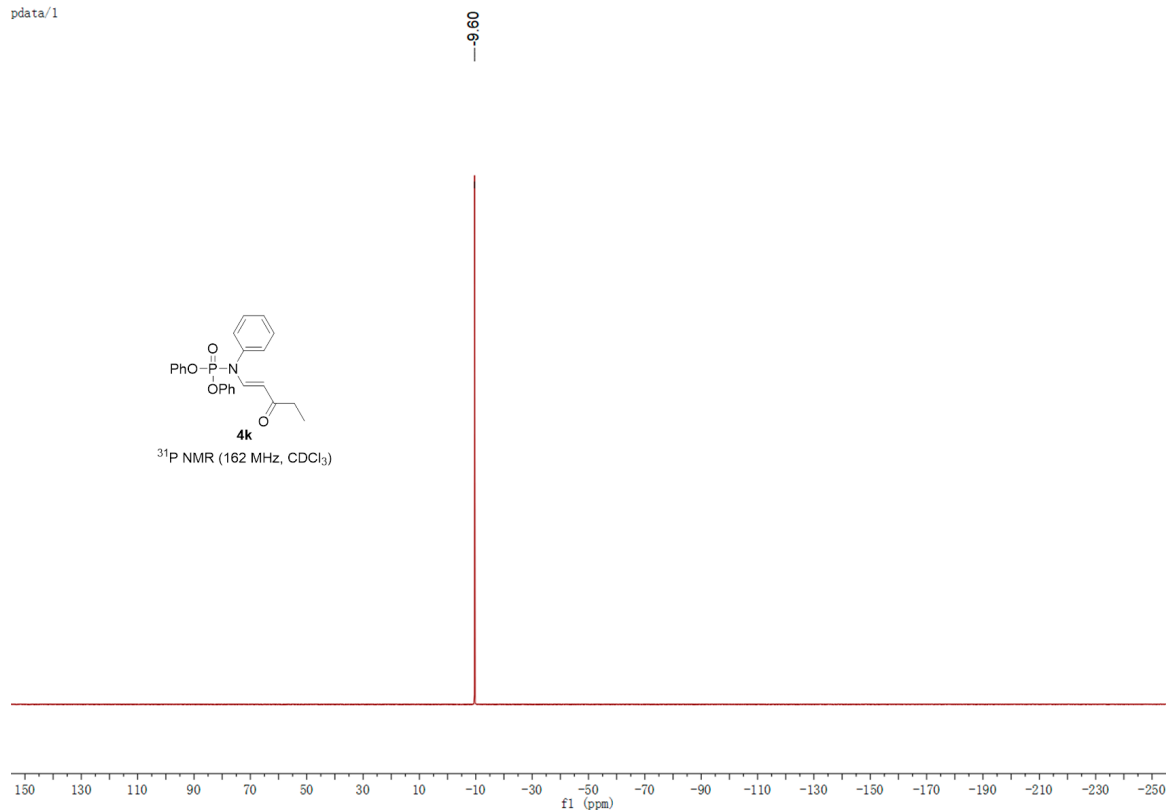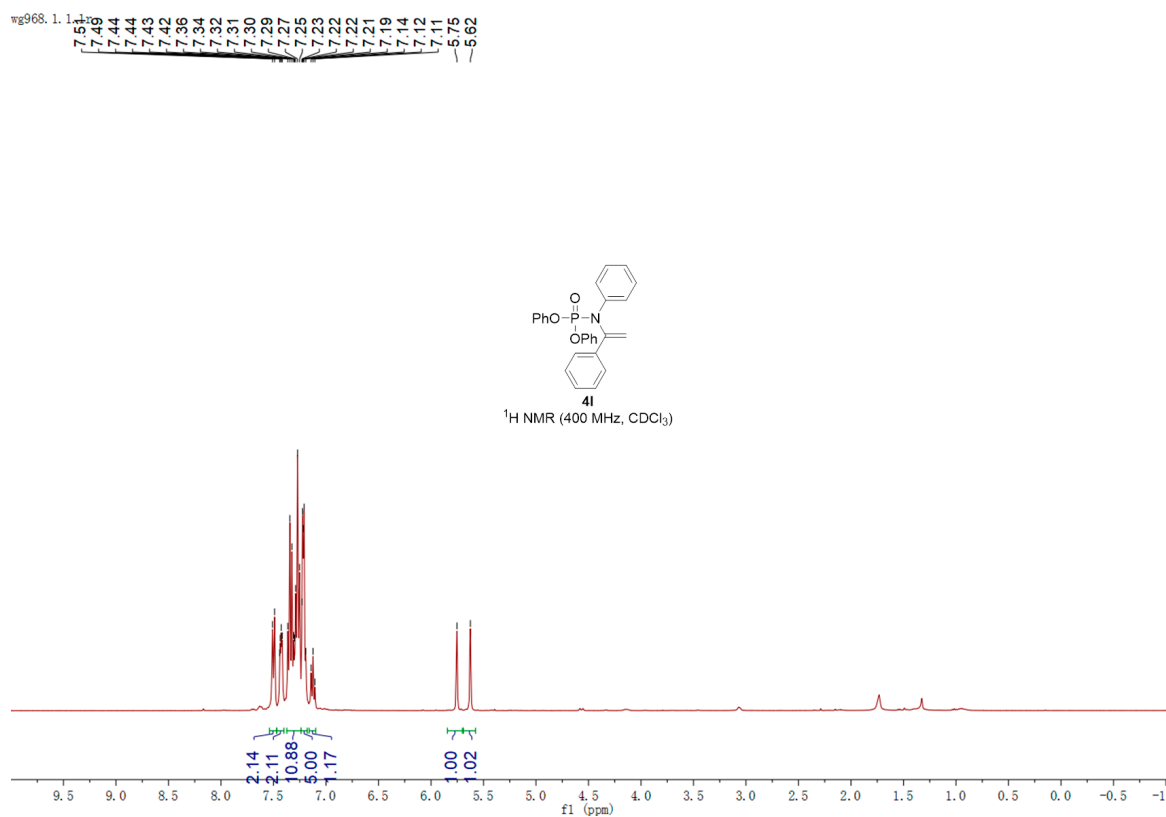

pdata/1

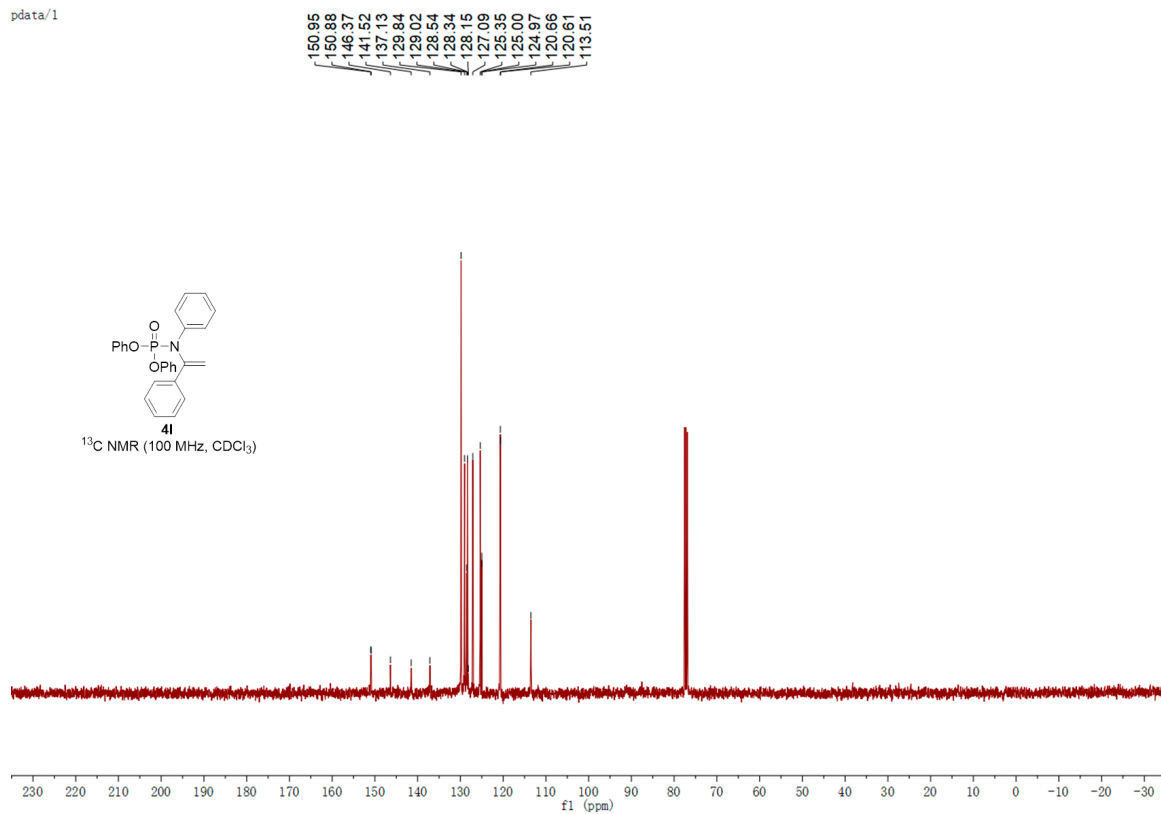

pdata/1

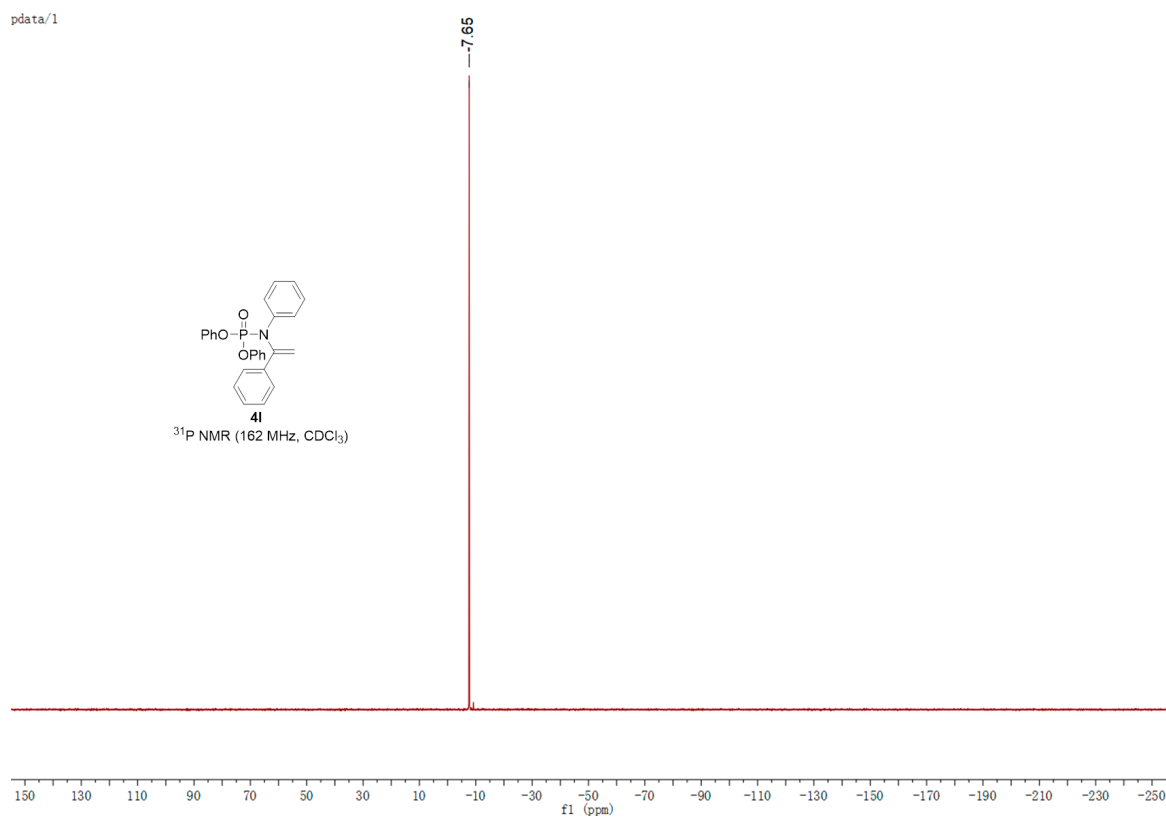

wg1183.1.1.1r

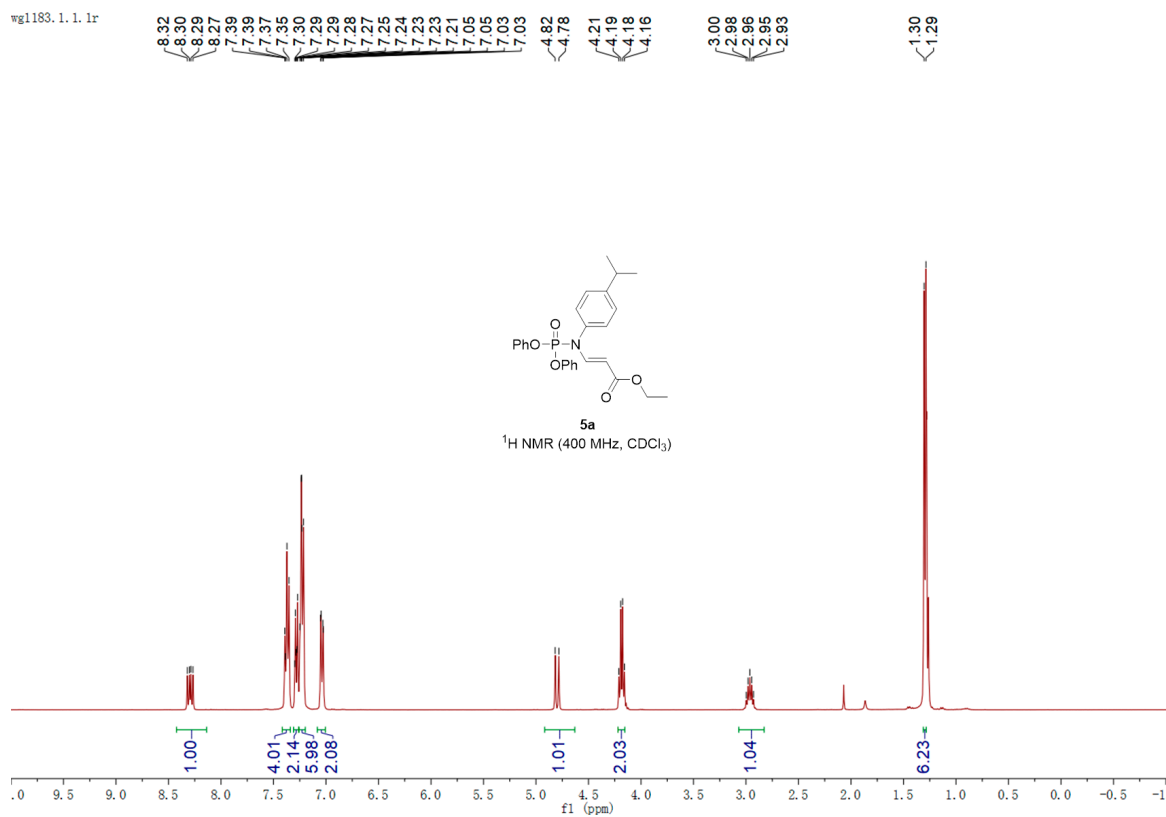

pdata/1

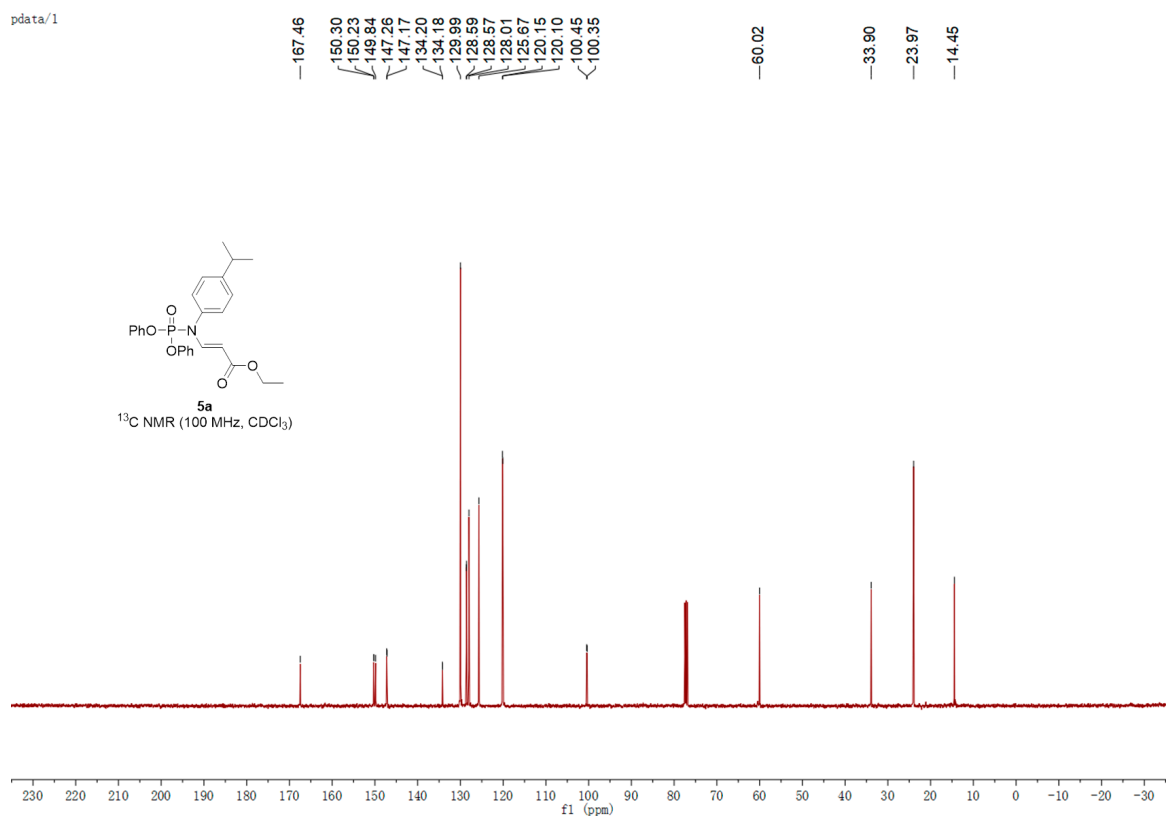

pdata/1

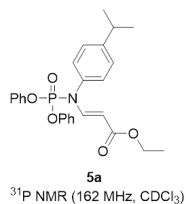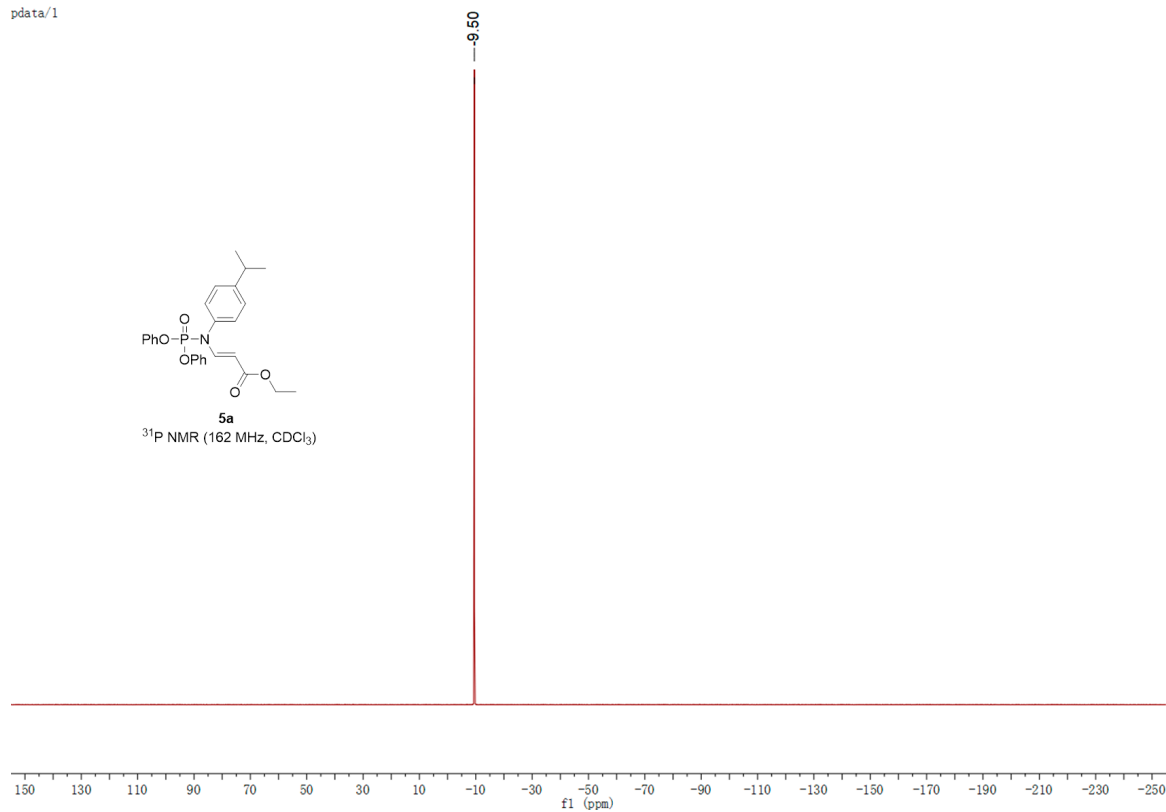

wg1187.1.1.1r

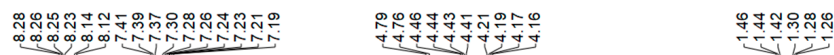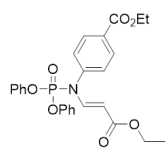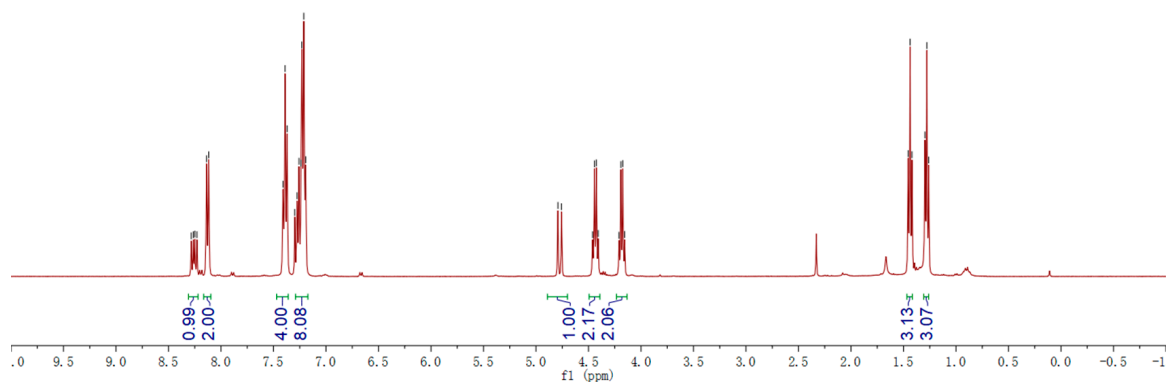

pdata/1

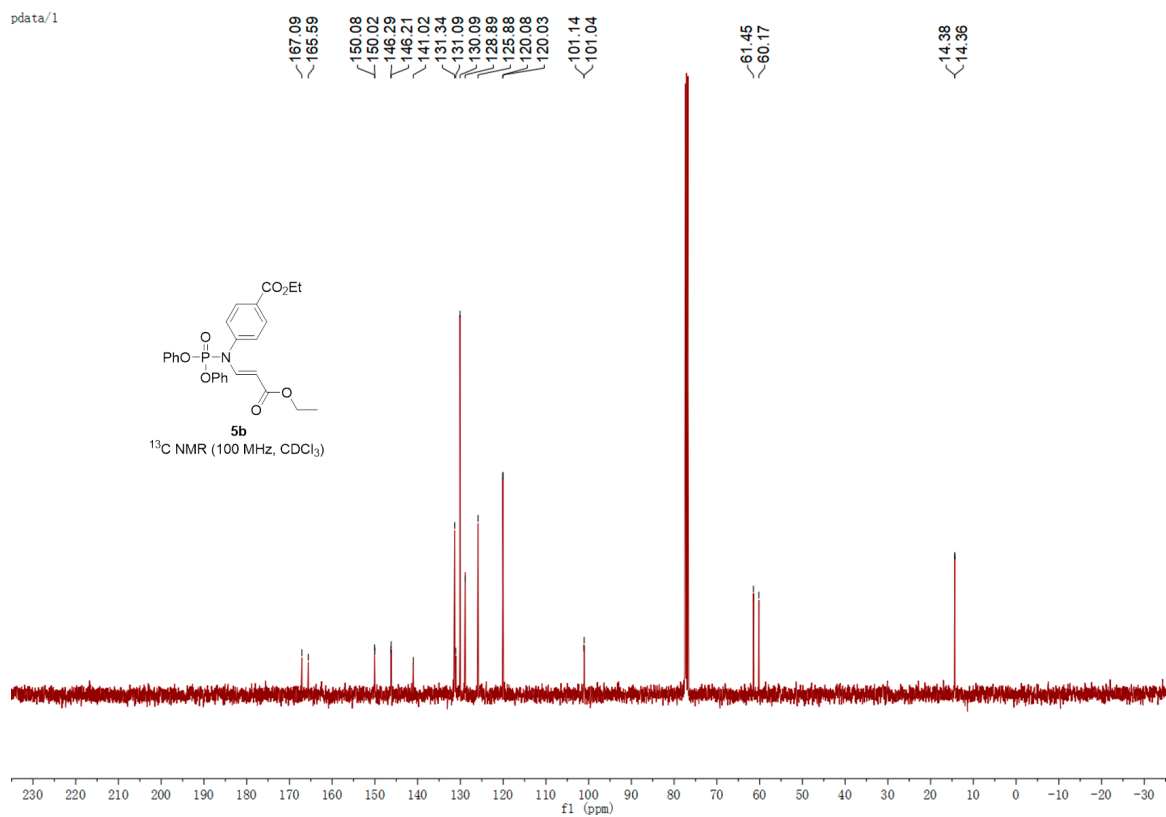

pdata/1

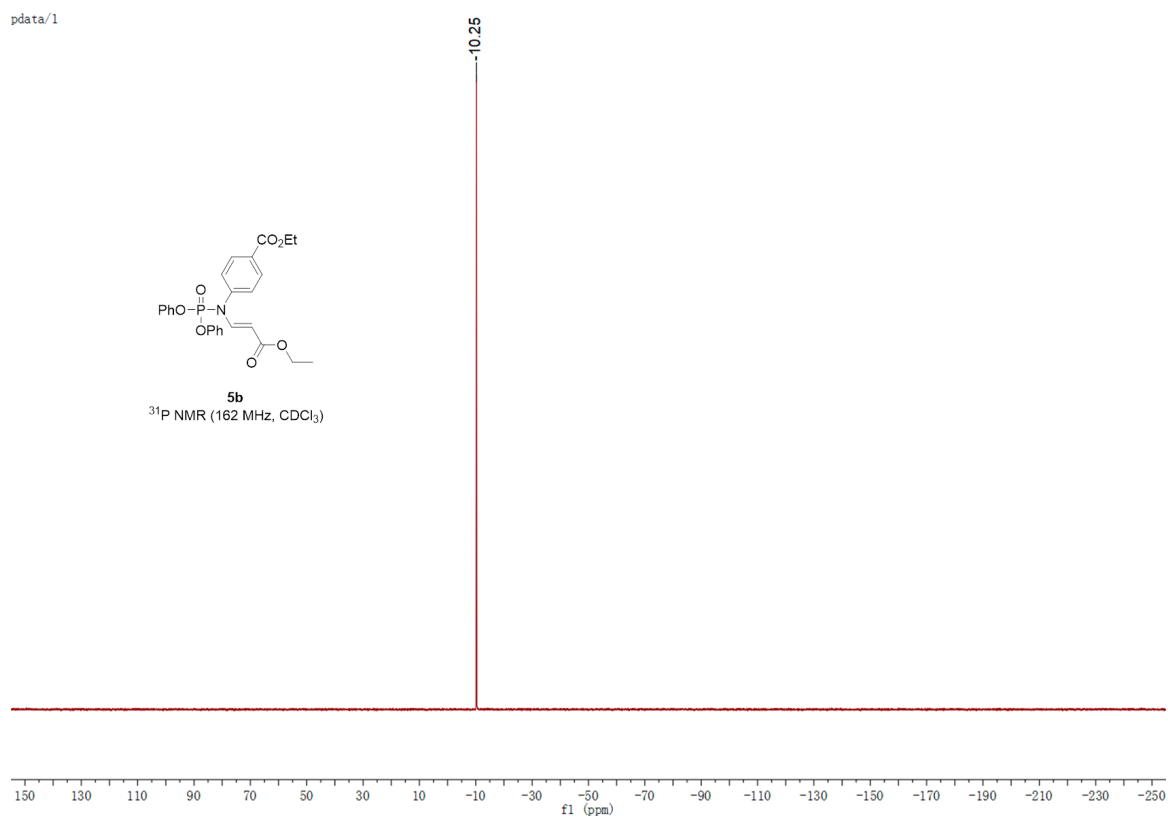



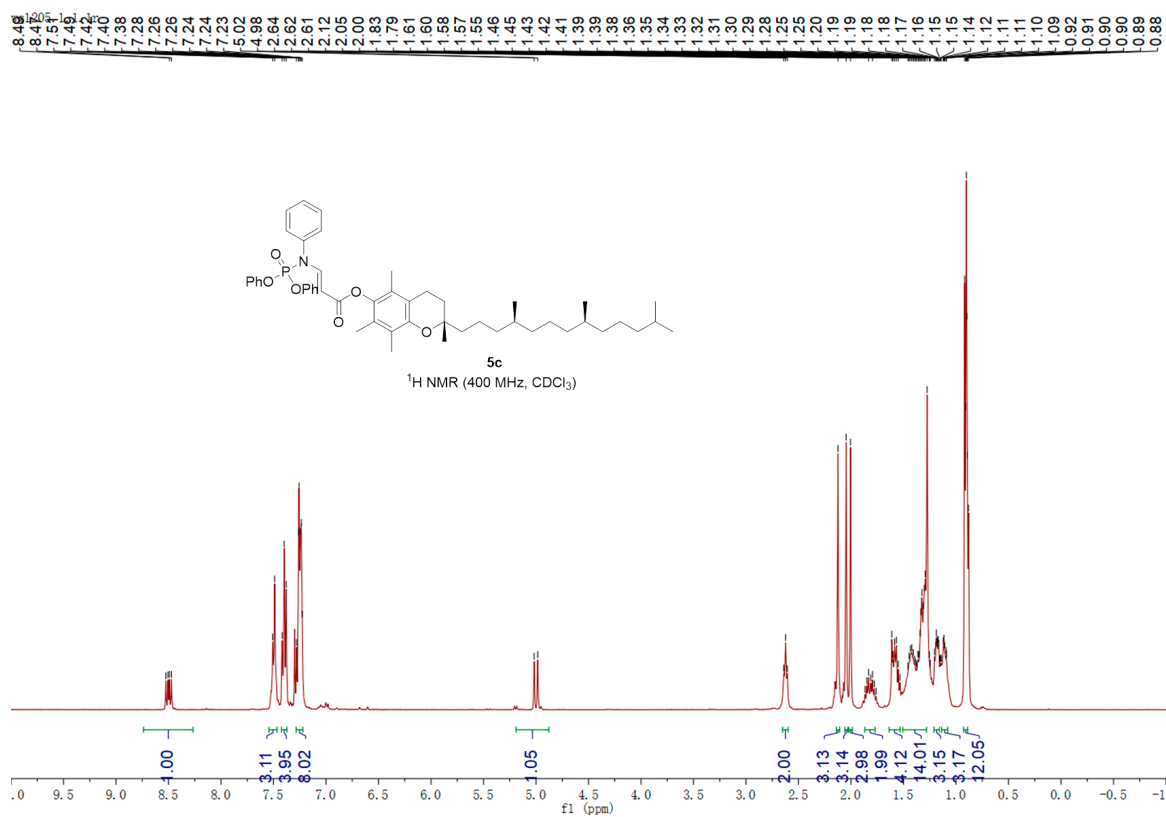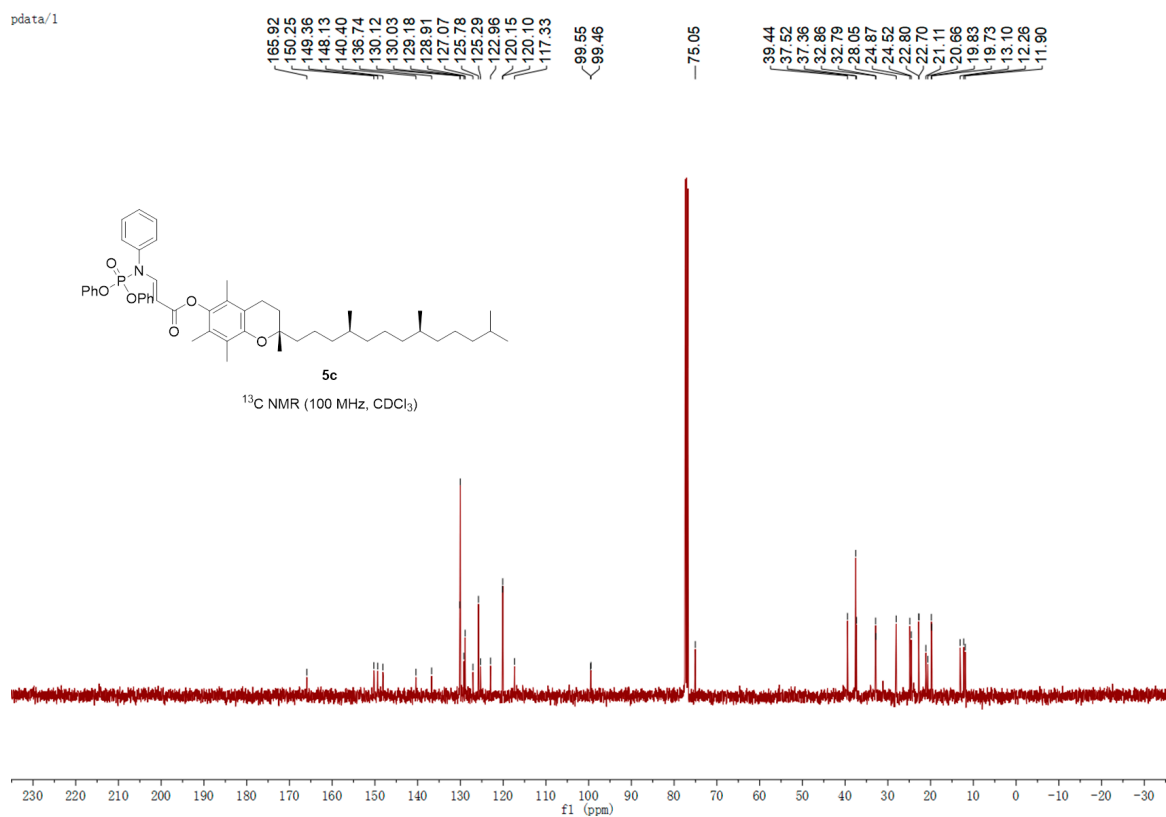

pdata/1

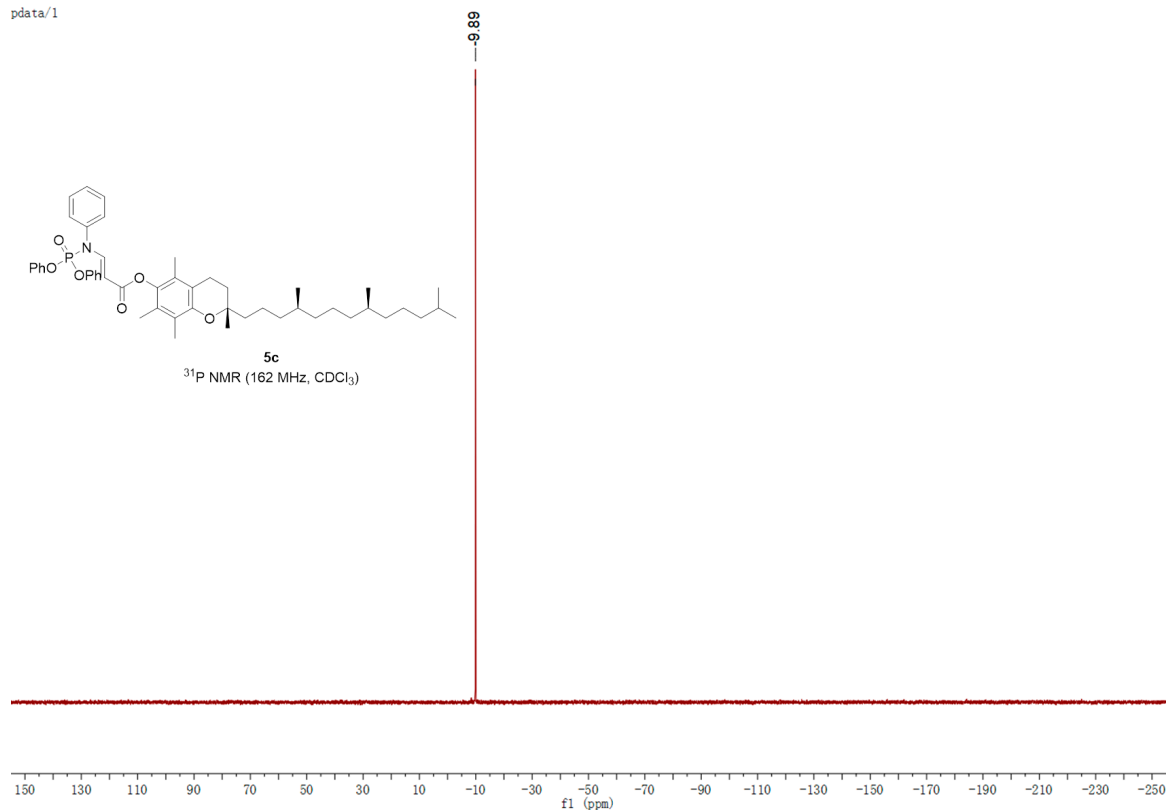

# HRMS spectra of products

960 #51 RT: 0.74 AV: 1 SB: 24 0.01-0.09 0.77-1.02 NL: 2.07E5  
T: FTMS {1,1} + p ESI Full ms [100.00-1000.00]

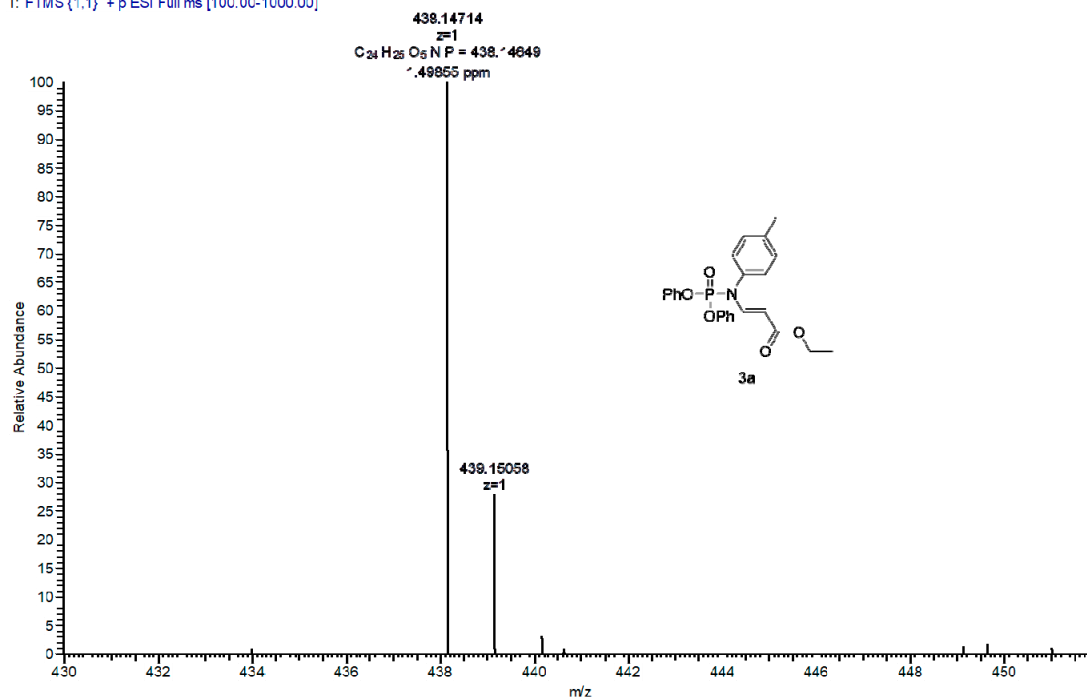

952 #31 RT: 0.45 AV: 1 NL: 1.21E6  
T: FTMS {1,1} + p ESI Full ms [100.00-1000.00]

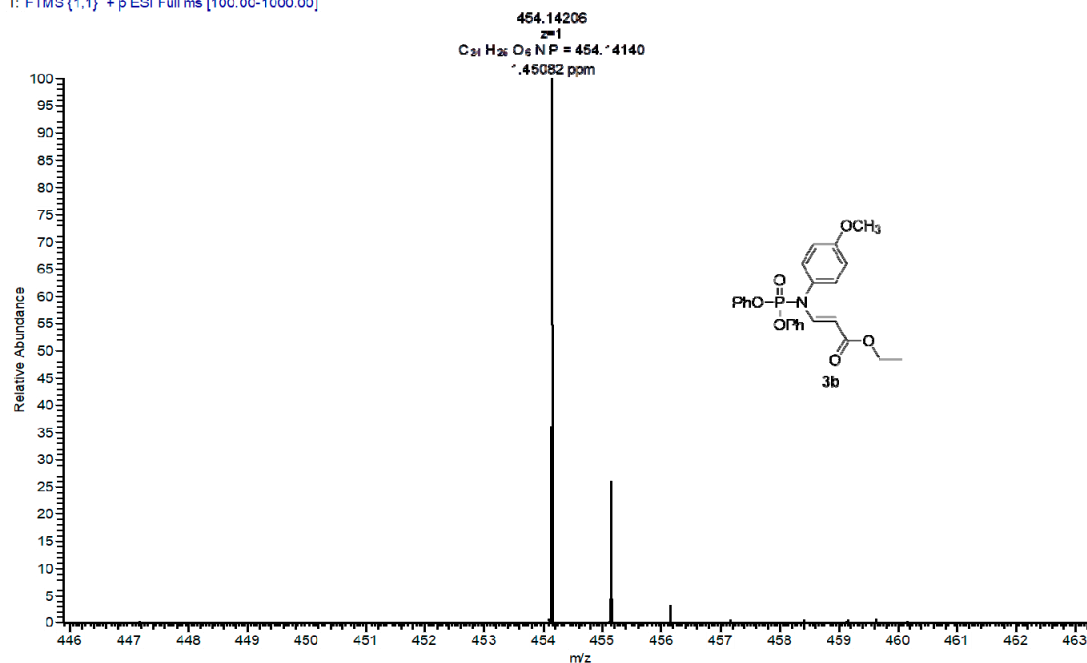

954 #33 RT: 0.48 AV: 1 SB: 24 0.01-0.09 0.78-1.03 NL: 7.24E5  
T: FTMS (1,1) +p ESI Full ms [100.00-1000.00]

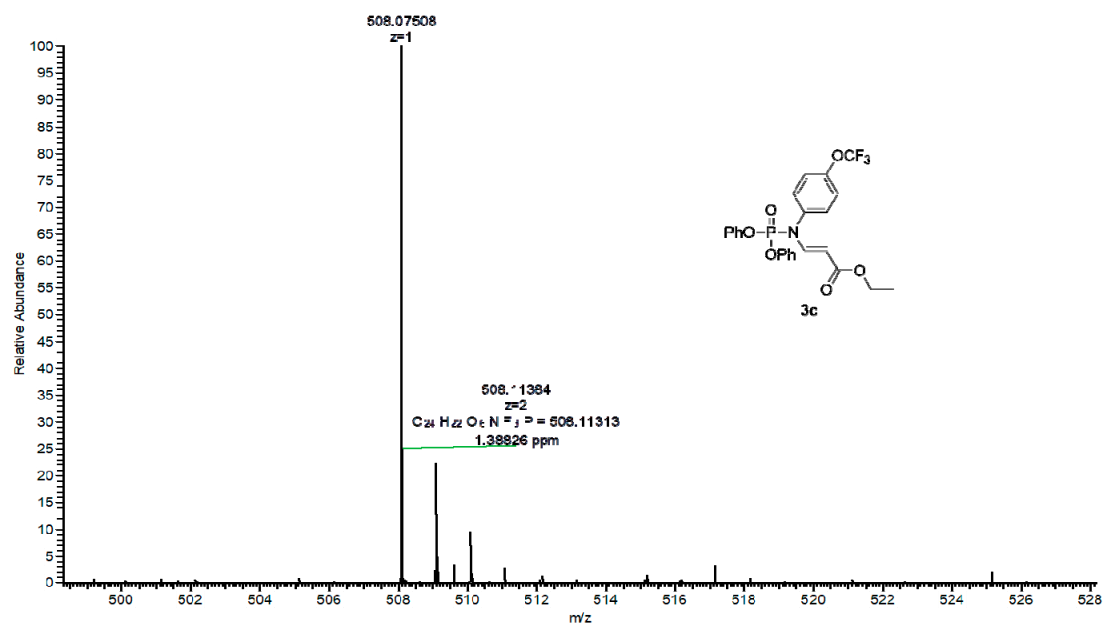

1184 #43 RT: 0.62 AV: 1 SB: 6 0.00-0.08 NL: 3.95E5  
T: FTMS (1,1) +p ESI Full ms [100.00-1000.00]

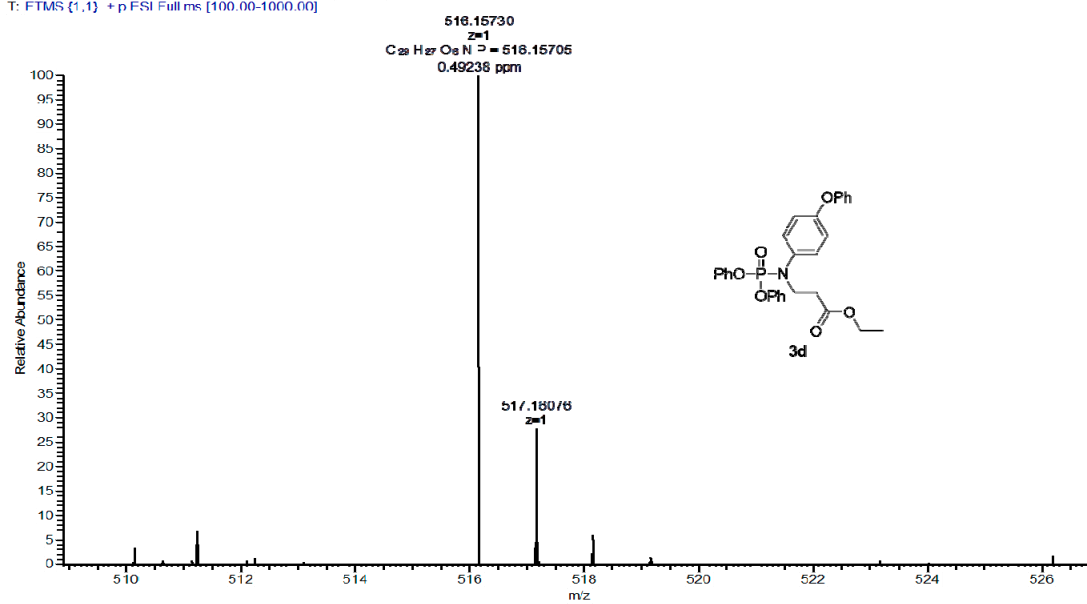

1181 #43 RT: 0.63 AV: 1 SB: 6 0.01-0.09 NL: 7.38E5  
T: LTMS (1,1) + p ESI Full ms [100.00-1000.00]

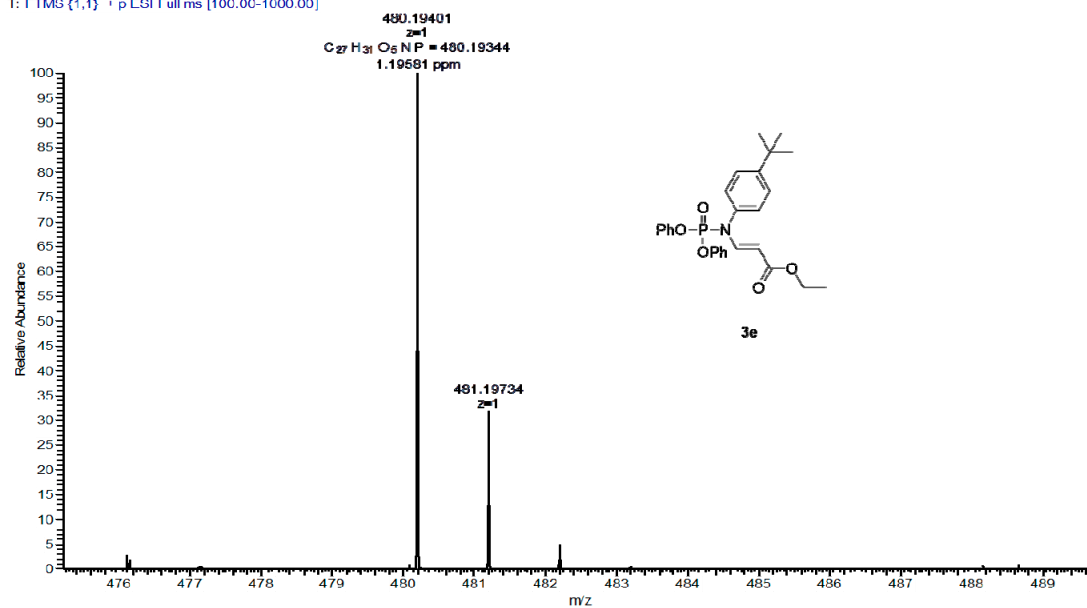

951 #85 RT: 0.95 AV: 1 SB: 24 0.01-0.09, 0.78-1.03 NL: 4.09E4  
T: LTMS (1,1) + p ESI Full ms [100.00-1000.00]

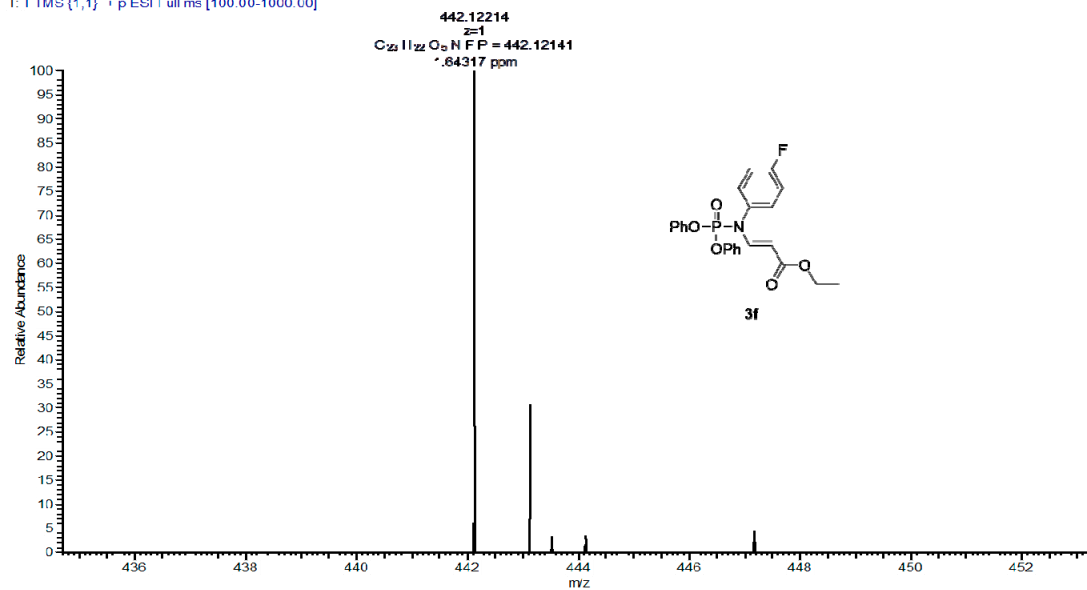

961 #13 RT: 0.20 AV: 1 SB: 24 0.01-0.09 0.78-1.03 NL: 7.03E5  
T: FTMS (1,1) + p ESI Full ms [100.00-1000.00]

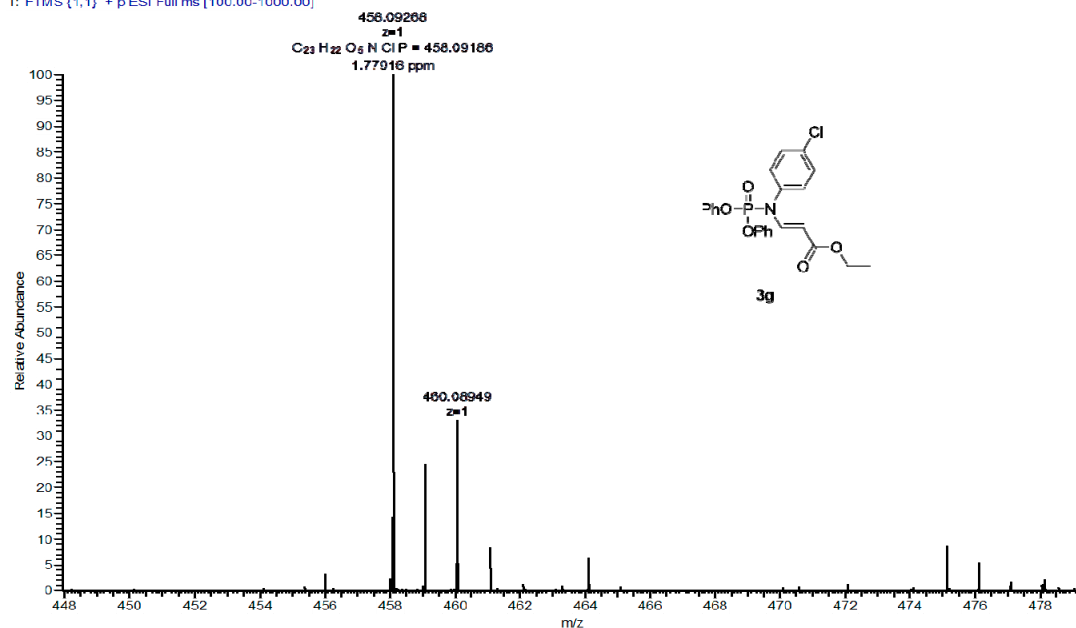

969 #11 RT: 0.17 AV: 1 SB: 6 0.01-0.09 NL: 5.64E4  
T: FTMS (1,1) + p ESI Full ms [100.00-1000.00]

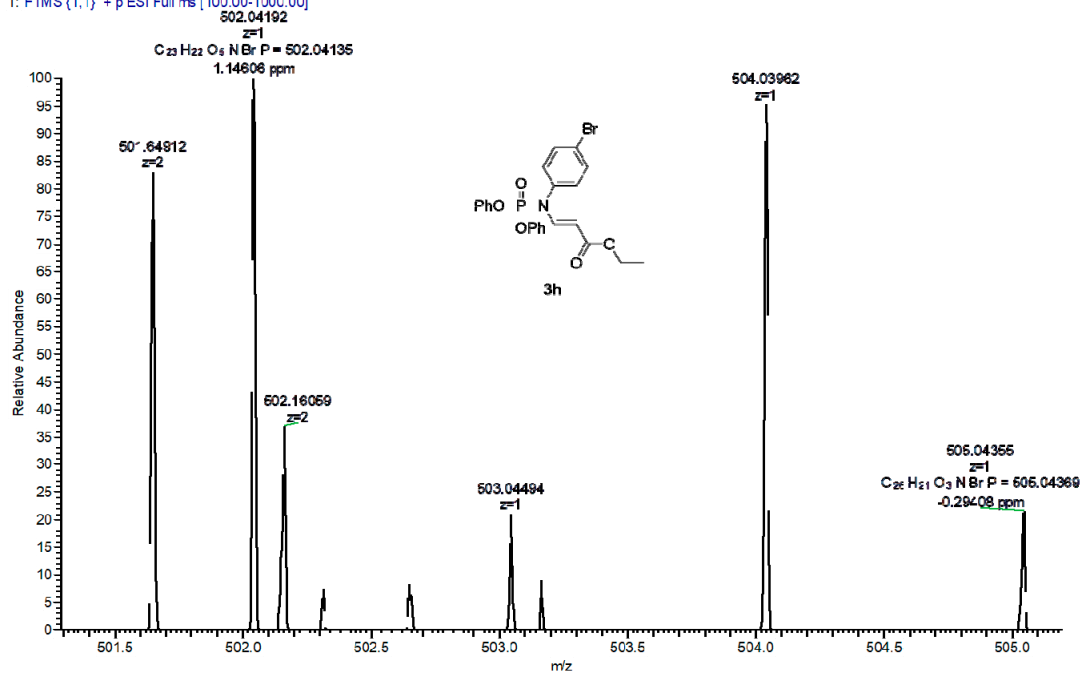

955 #13 RT: 0.20 AV: 1 SB: 24 0.01-0.09 0.78-1.03 NL: 5.41E5  
T: FTMS (1,1) + p ESI Full ms [100.00-1000.00]

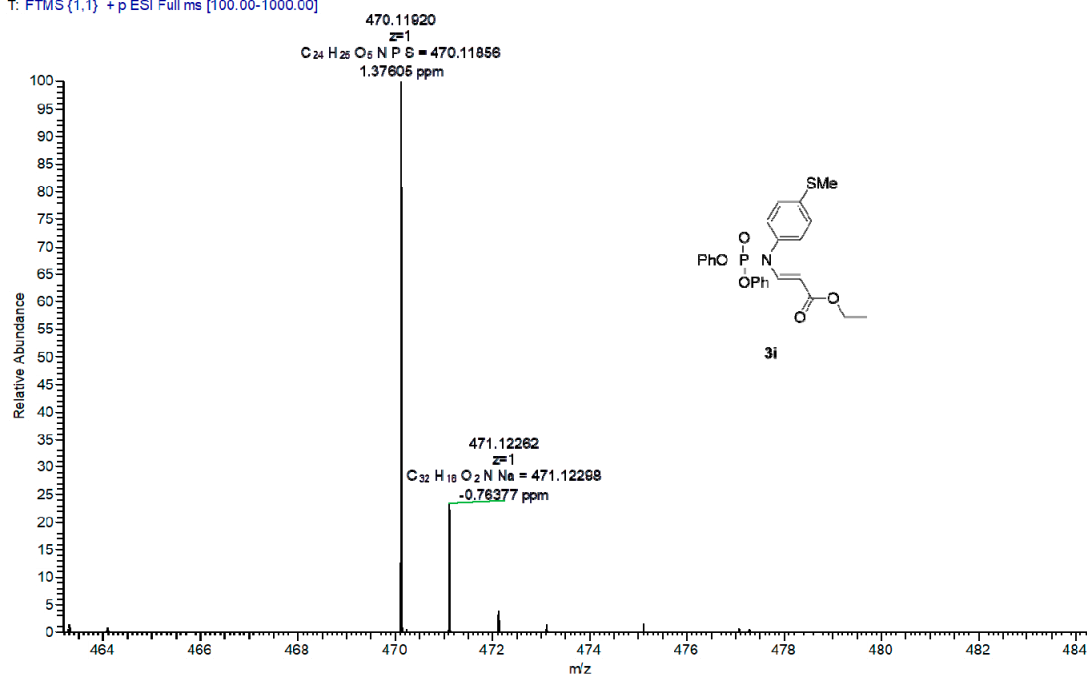

965 #47 RT: 0.71 AV: 1 SB: 6 0.01-0.09 NL: 1.63E4  
T: FTMS (1,1) + p ESI Full ms [100.00-1000.00]

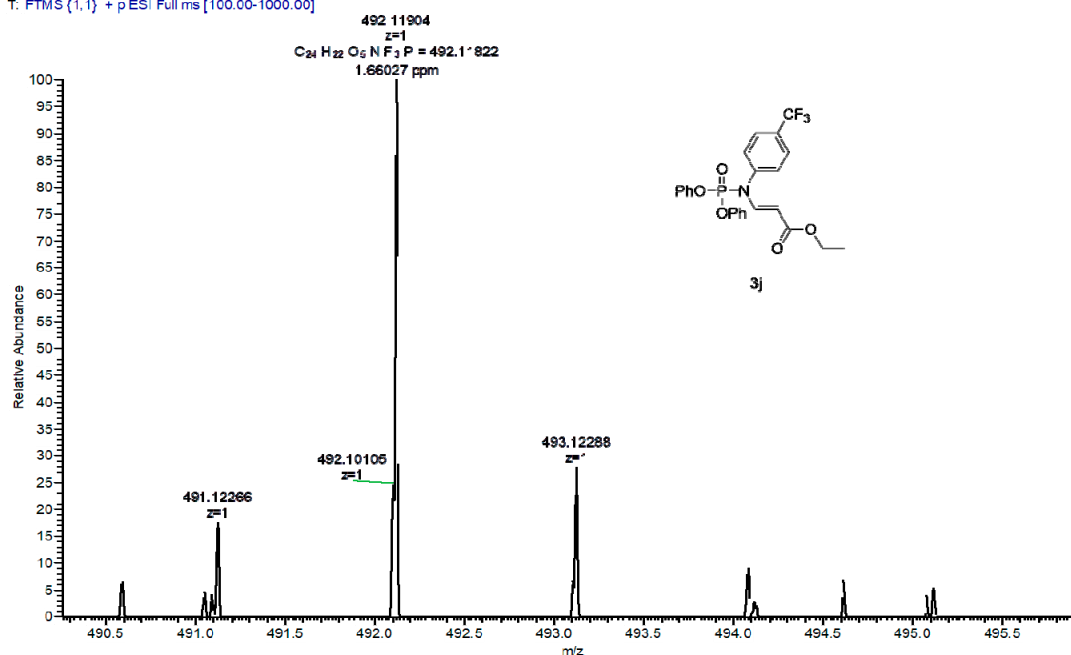

1185 #47 RT: 0.68 AV: 1 SB: 6 0.01-0.09 NL: 3.69E5  
T: FTMS {1,1} + p ESI Full ms [100.00-1000.00]

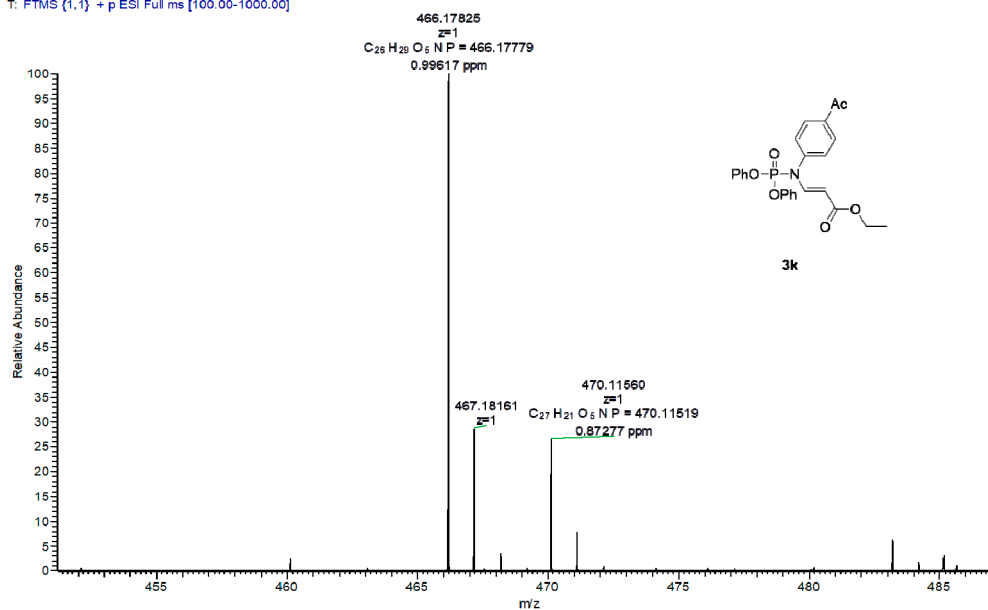

1191 #13 RT: 0.20 AV: 1 SB: 6 0.01-0.09 NL: 9.38E4  
T: FTMS {1,1} + p ESI Full ms [100.00-1000.00]

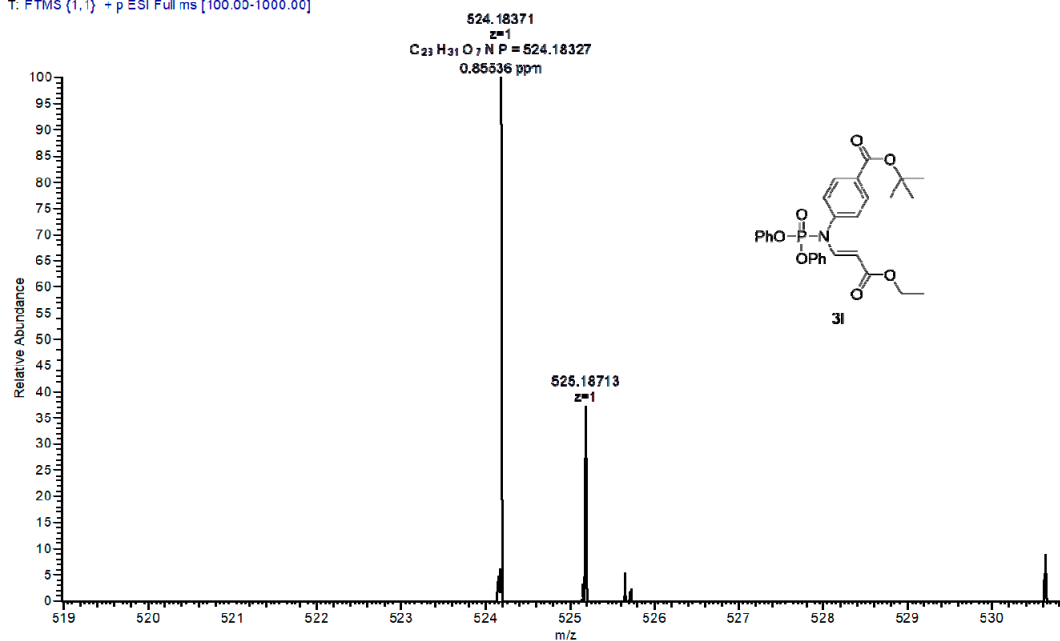



978 #43 RT: 0.63 AV: 1 SB: 6 0.01-0.09 NL: 4.44E5  
T: FTMS (1,1) + p ESI Full ms [100.00-1000.00]

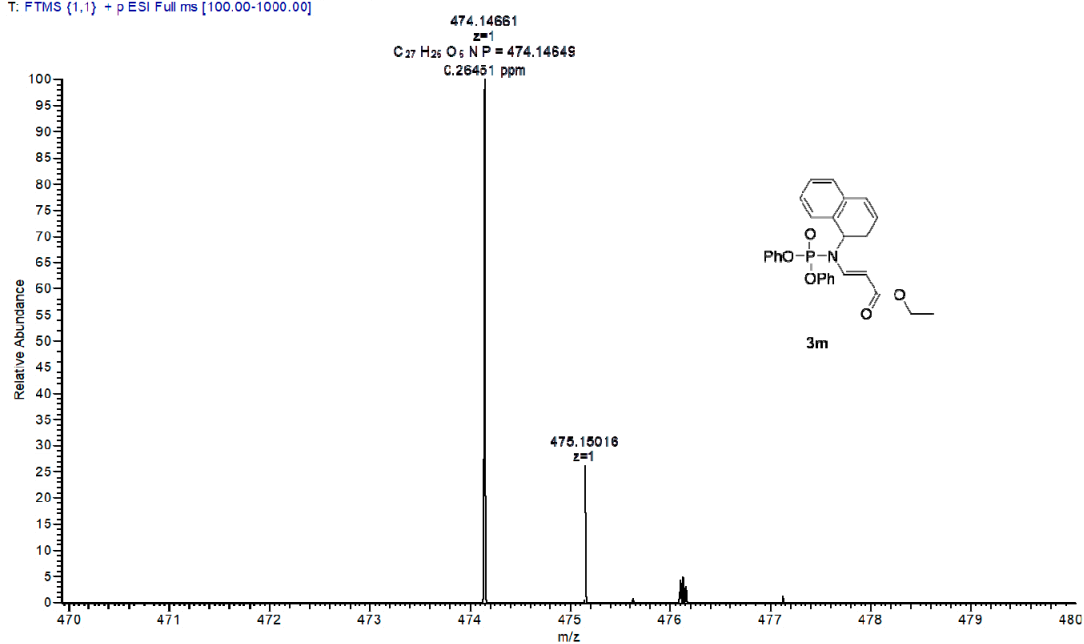

974 #21 RT: 0.31 AV: 1 SB: 6 0.01-0.09 NL: 1.22E6  
T: FTMS (1,1) + p ESI Full ms [100.00-1000.00]

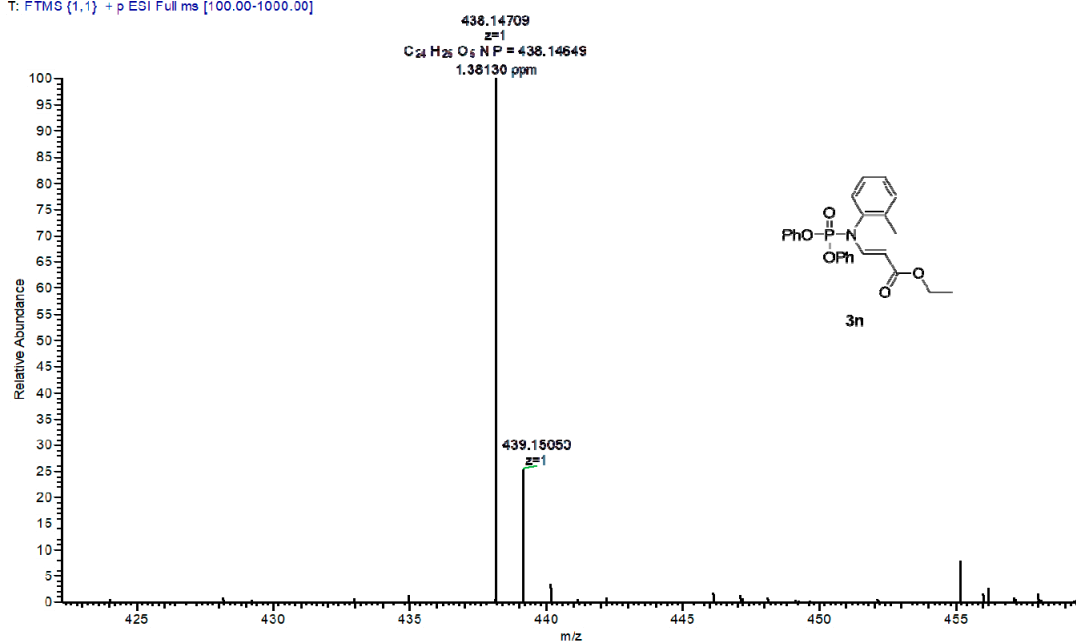

1192 #13 RT: 0.20 AV: 1 SB: 6 0.01-0.09 NL: 3.06E5  
T: FTMS (1,1) + p ESI Full ms [100.00-1000.00]

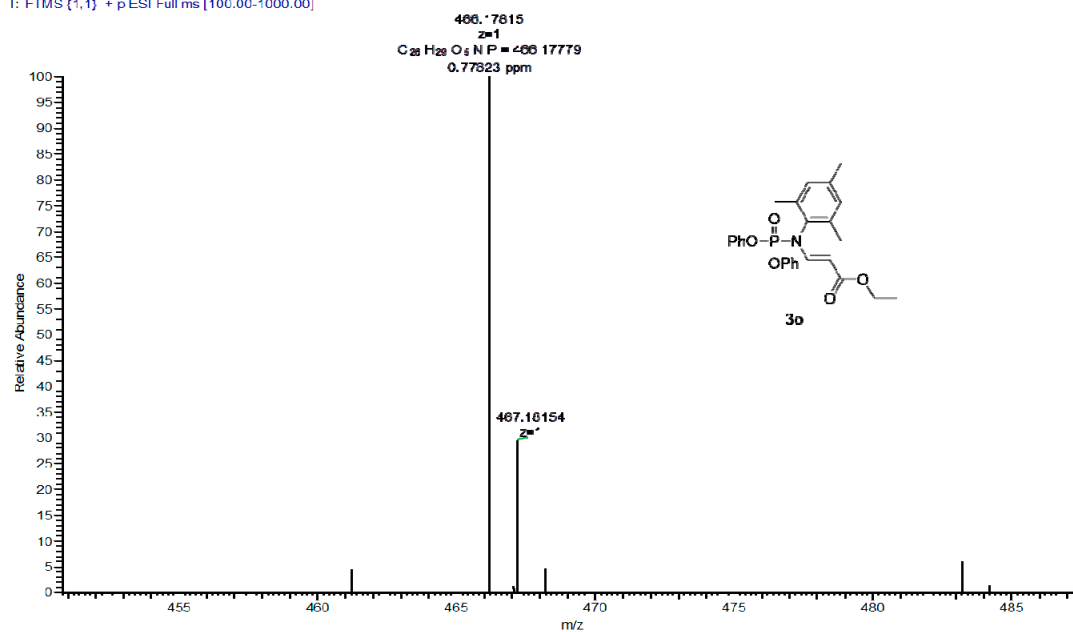

957 #51 RT: 0.75 AV: 1 SB: 24 0.01-0.09 0.78-1.03 NL: 3.78E5  
T: FTMS (1,1) + p ESI Full ms [100.00-1000.00]

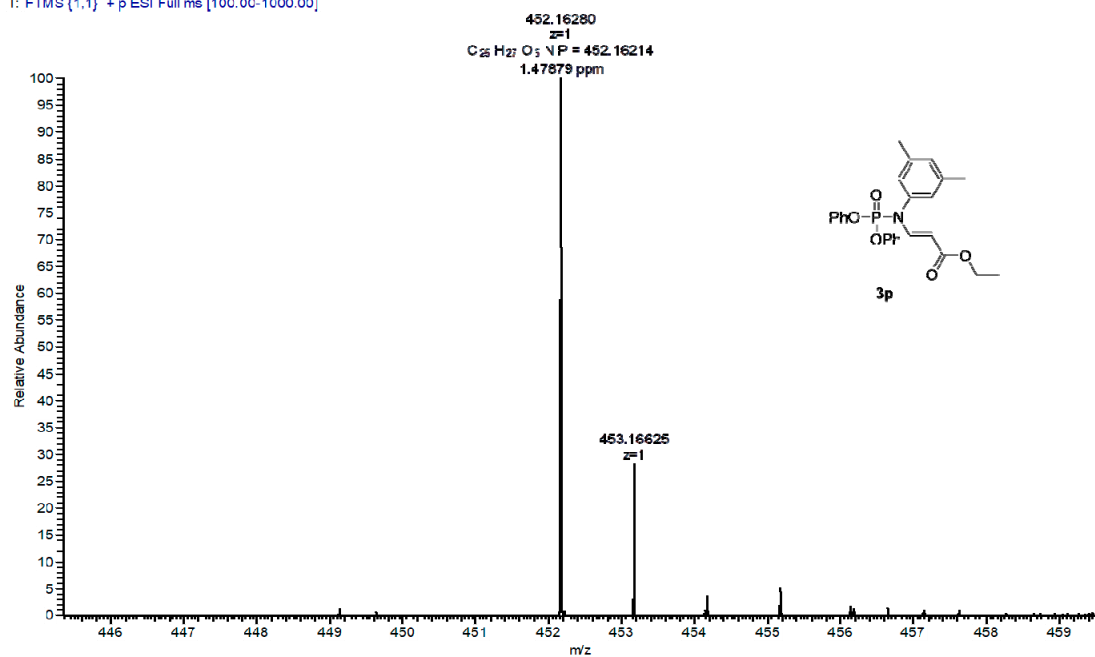

1188 #13 RT: 0.20 AV: 1 SB: 6 0.01-0.09 NL: 6.71E5  
T: FTMS (1,1) + p ESI Full ms [100.00-1000.00]

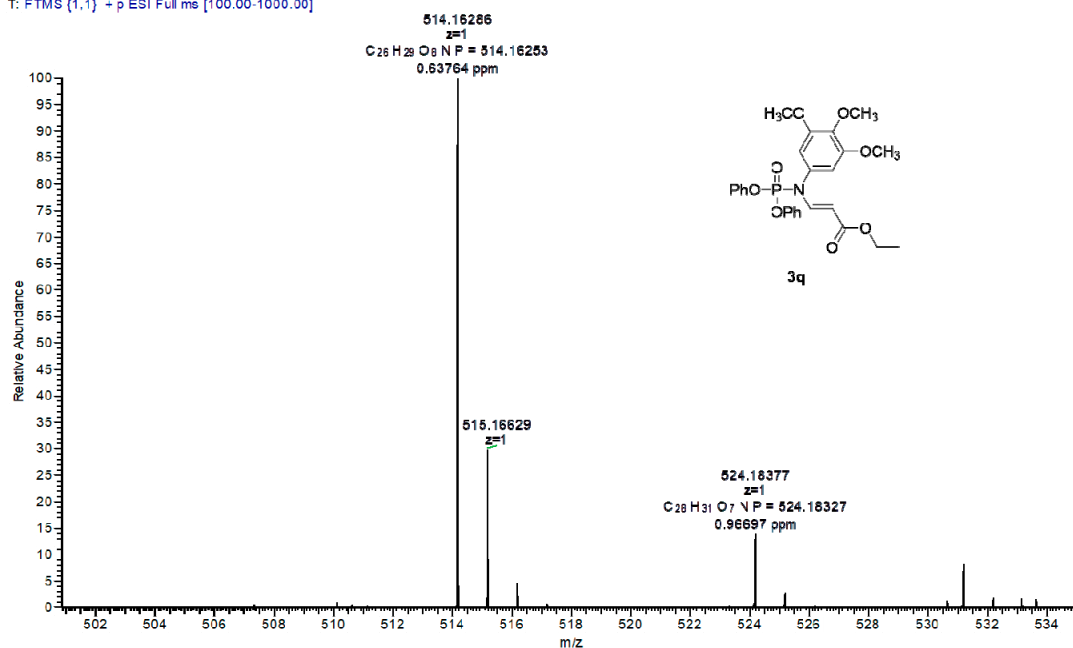

1197 #15 RT: 0.22 AV: 1 SB: 6 0.00-0.08 NL: 5.17E5  
T: FTMS (1,1) + p ESI Full ms [100.00-1000.00]

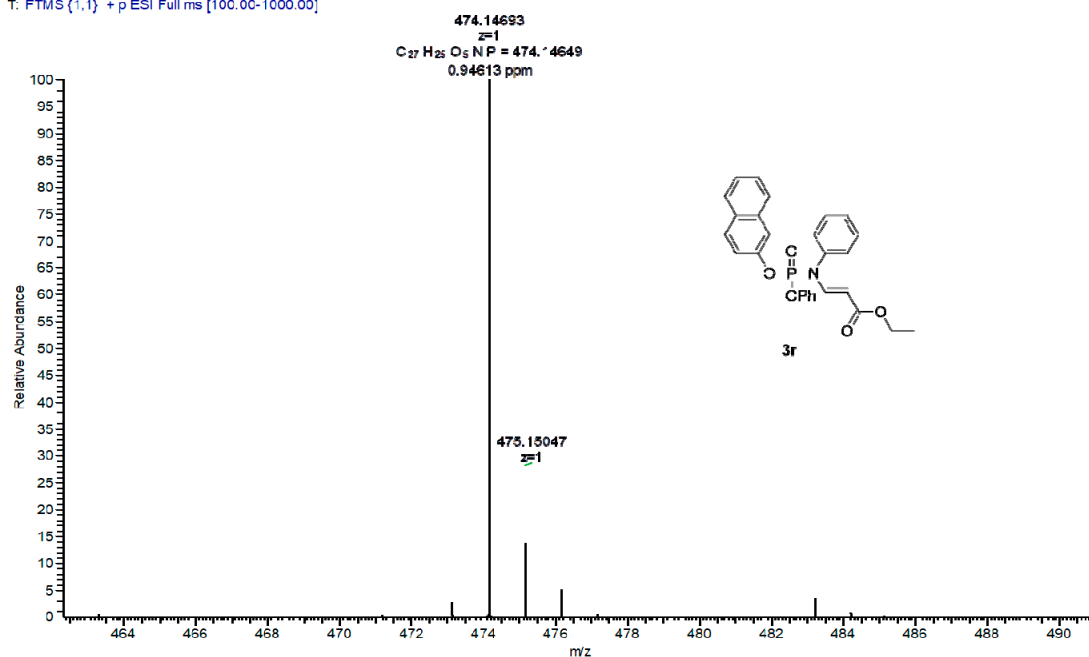

1198 #15 RT: 0.22 AV: 1 SB: 6 0.00-0.09 NL: 8.19E4  
T: FTMS (1,1) + p ESI Full ms [100.00-1000.00]

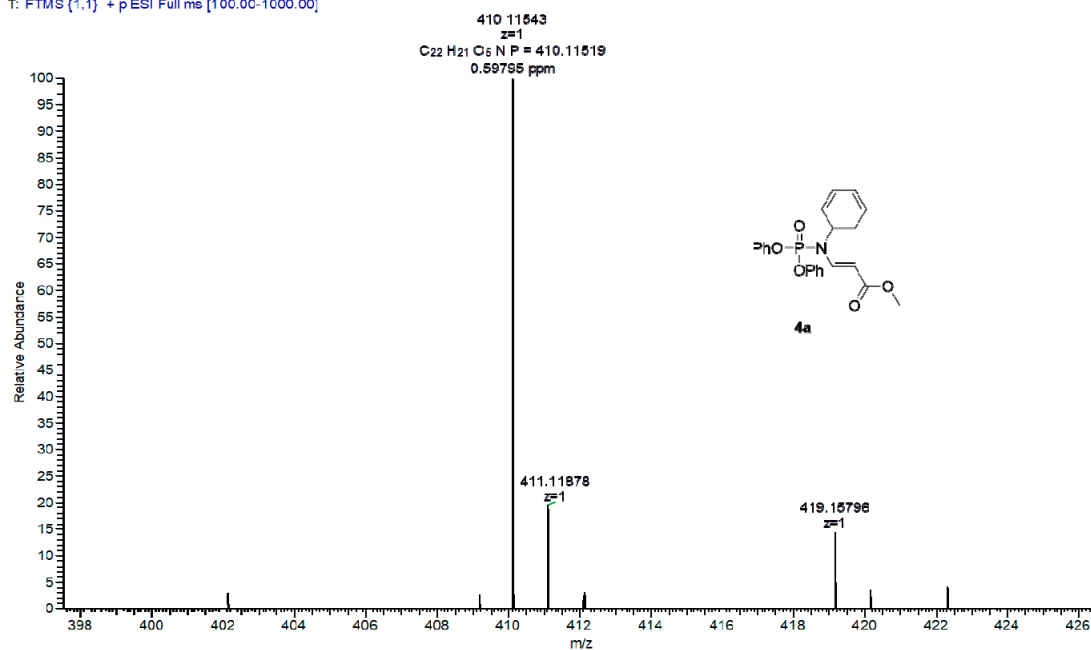

1200 #13 RT: 0.19 AV: 1 SB: 6 0.01-0.09 NL: 6.85E4  
T: FTMS (1,1) + p ESI Full ms [100.00-1000.00]

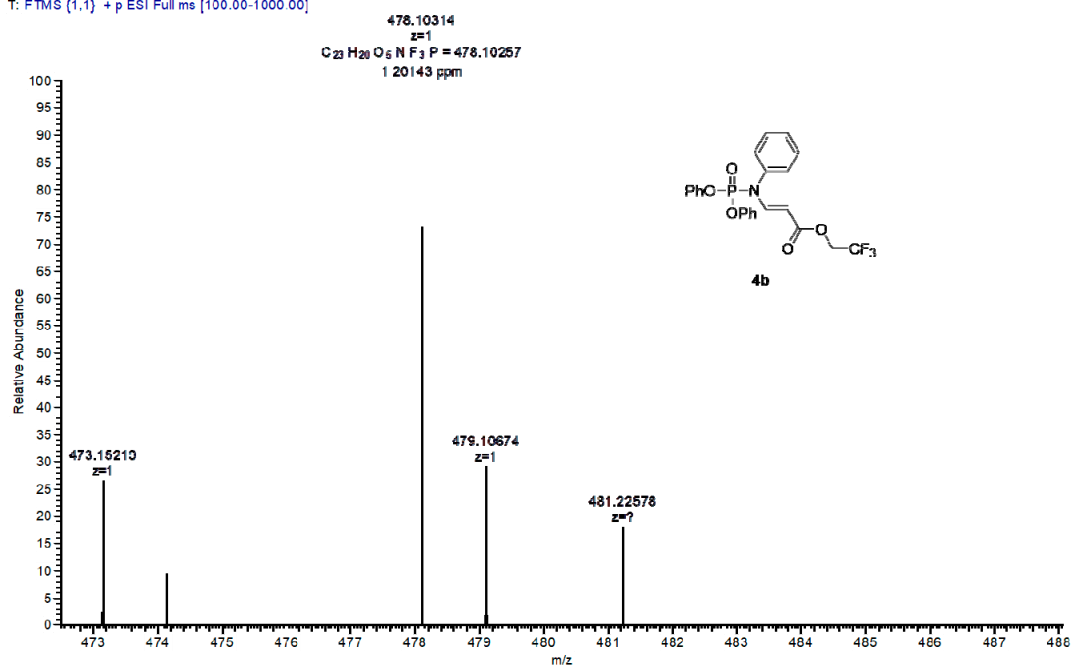

1203 #17 RT: 0.24 AV: 1 SB: 6 0.01-0.09 NL: 1.78E6  
T: FTMS (1,1) + p ESI Full ms [100.00-1000.00]

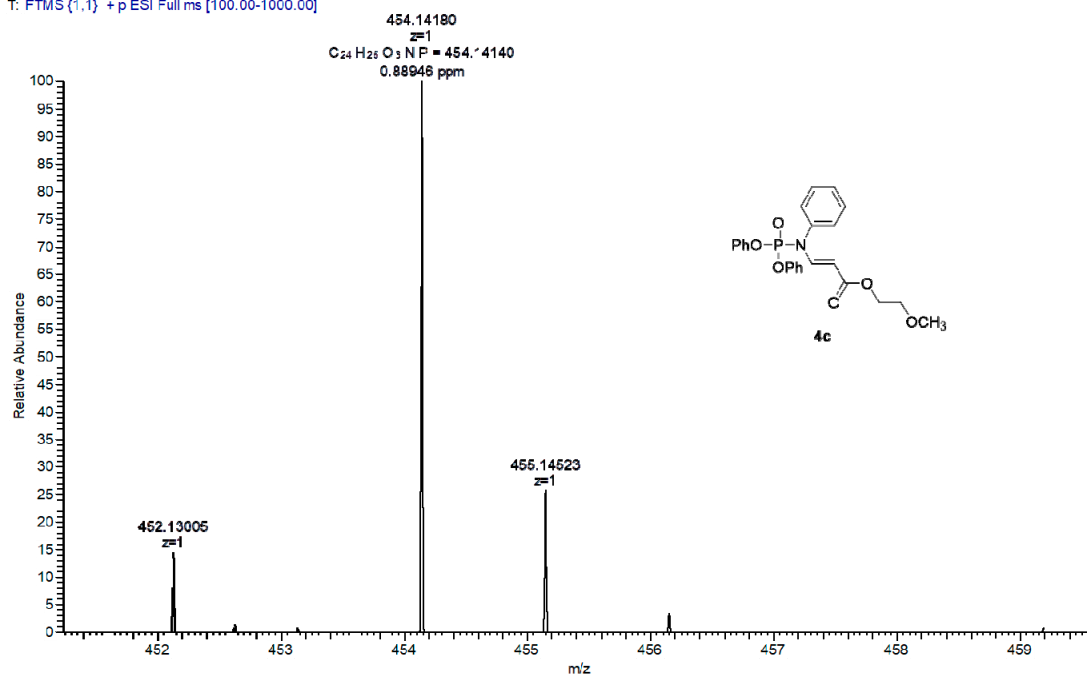

1201 #13 RT: 0.20 AV: 1 SB: 6 0.01-0.09 NL: 8.25E4  
T: FTMS (1,1) + p ESI Full ms [100.00-1000.00]

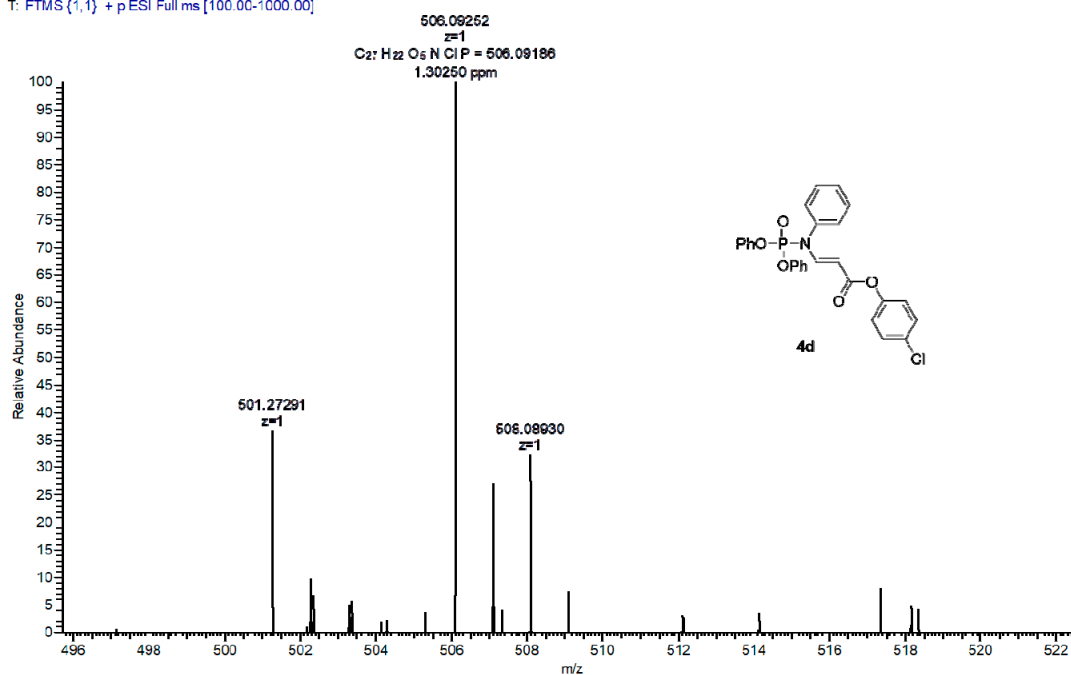

1210 #33 RT: 0.49 AV: 1 SB: 6 0.01-0.09 NL: 5.82E5  
T: FTMS (1,1) + p ESI Full ms [100.00-1000.00]

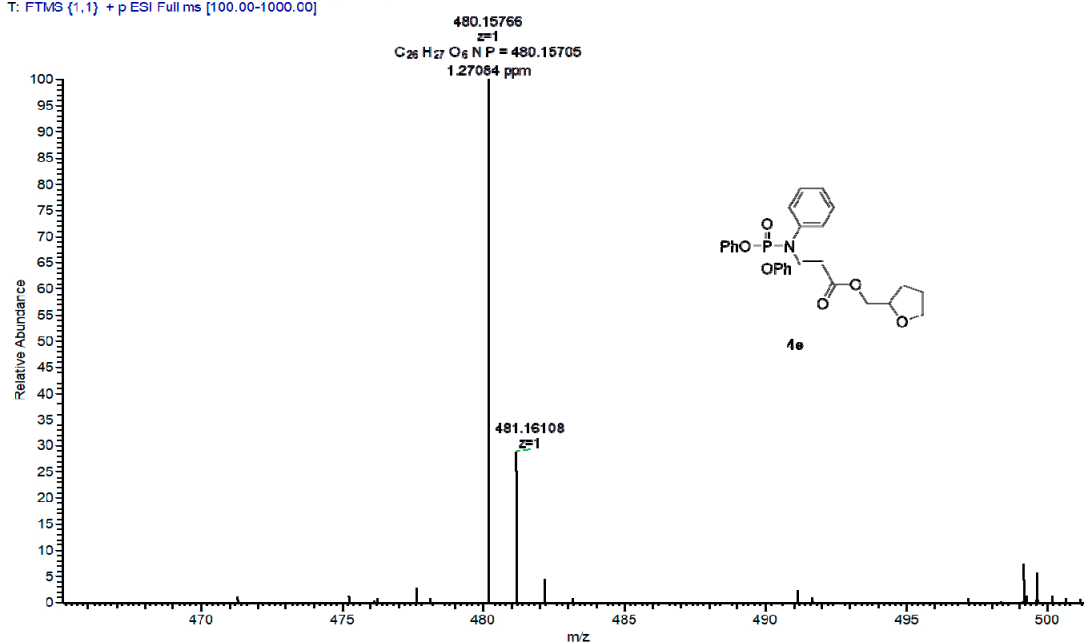

1207 #41 RT: 0.61 AV: 1 SB: 6 0.01-0.09 NL: 2.48E5  
T: FTMS (1,1) + p ESI Full ms [100.00-1000.00]

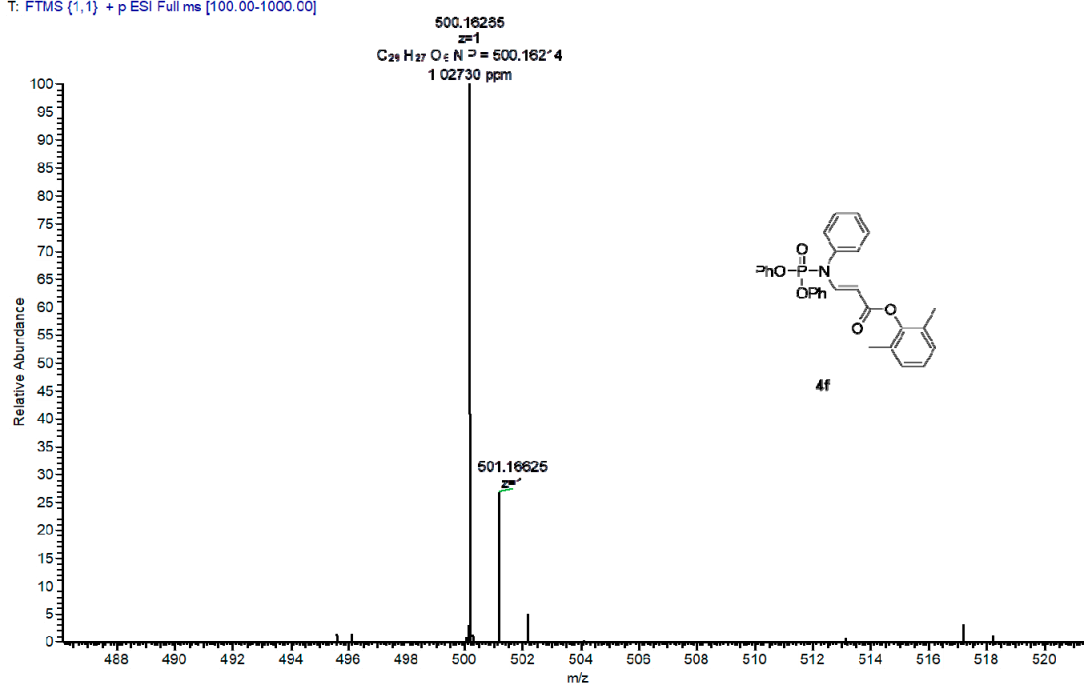

1206 #41 RT: 0.61 AV: 1 SB: 5 0.01-0.09 NL: 2.05E5  
T: FTMS (1,1) + p ESI Full ms [100.00-1000.00]

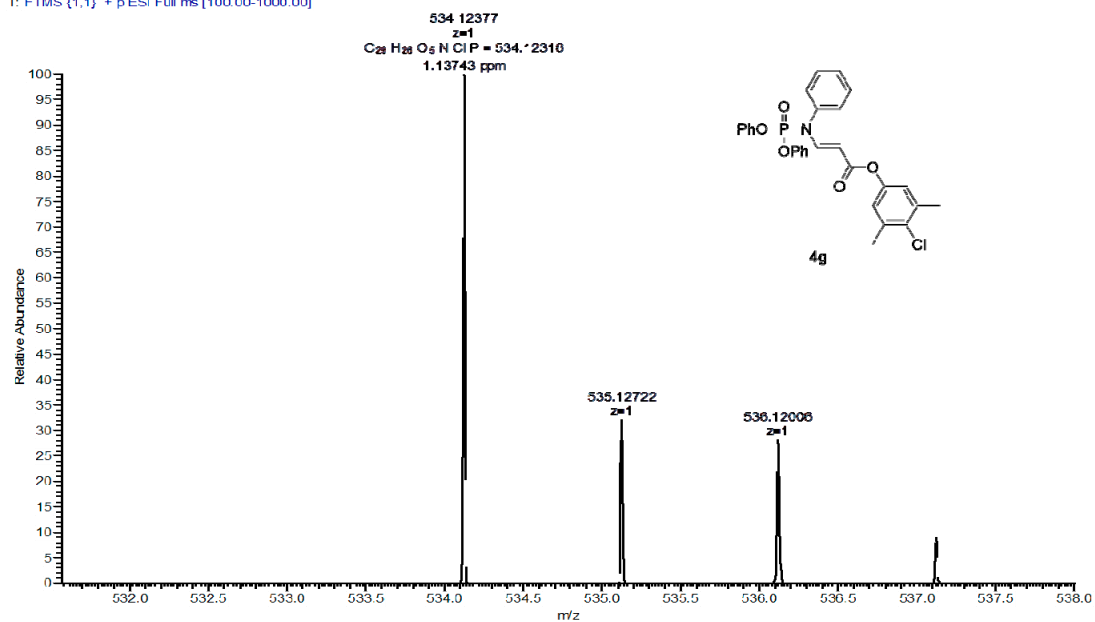

1209 #33 RT: 0.49 AV: 1 SB: 6 0.01-0.09 NL: 7.42E3  
T: FTMS (1,1) + p ESI Full ms [100.00-1000.00]

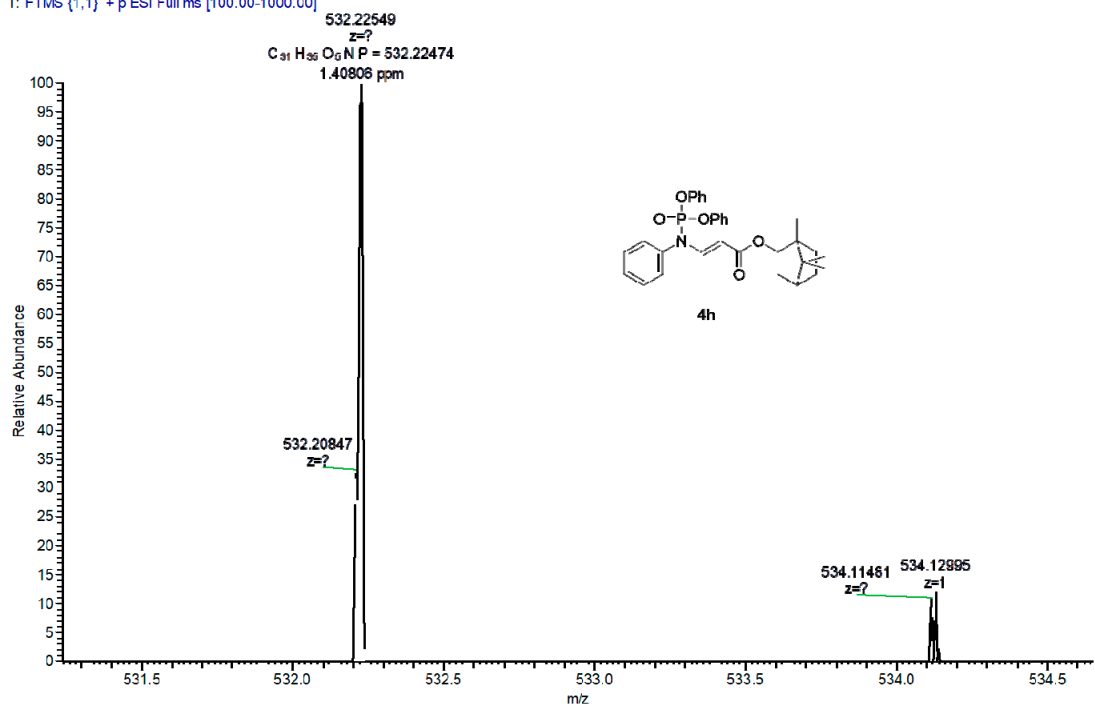

1204 #21 RT: 0.32 AV: 1 SB: 6 0.01-0.09 NL: 7.01E5  
T: FTMS (1,1) + p ESI Full ms [100.00-1000.00]

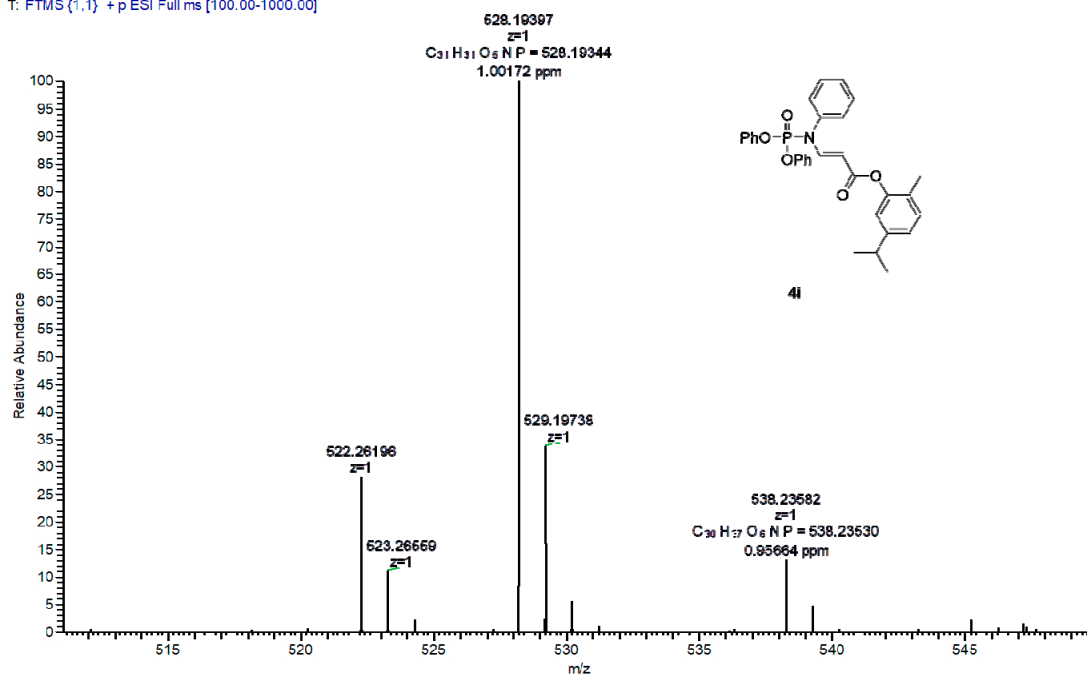

1202 #51 RT: 0.76 AV: 1 SB: 6 0.01-0.09 NL: 9.18E4  
T: FTMS (1,1) + p ESI Full ms [100.00-1000.00]

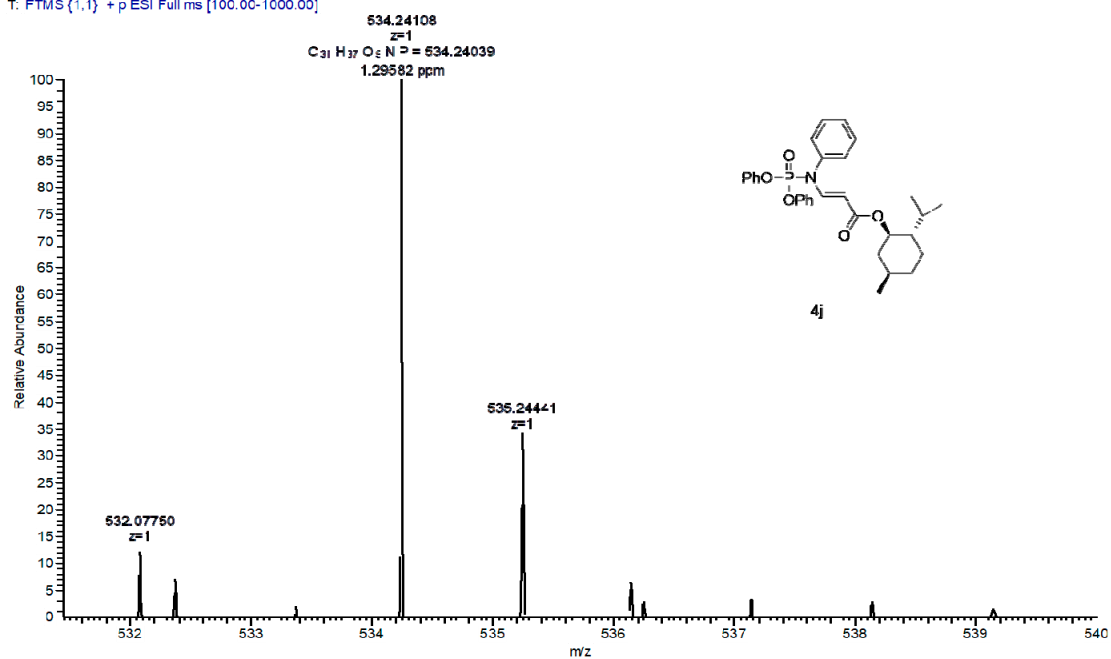



1199 #11 RT: 0.16 AV: 1 SB: 6 0.00-0.09 NL: 2.79E6  
T: FTMS (1,1) + p ESI Full ms [100.00-1000.00]

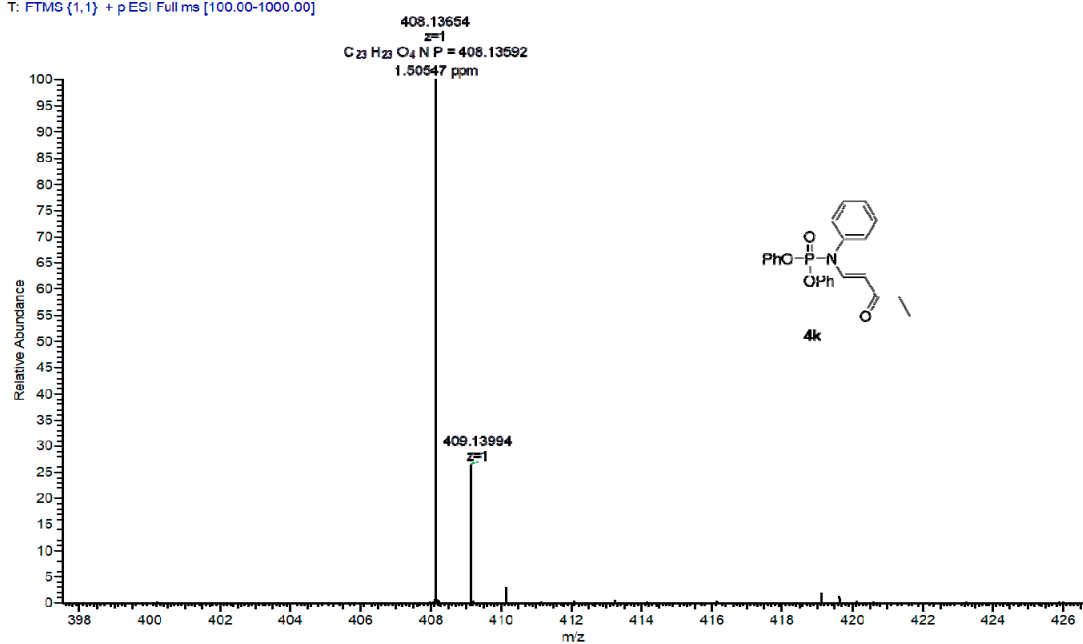

963 #21 RT: 0.29 AV: 1 SB: 6 0.01 0.09 NL: 1.21E6  
T: FTMS (1,1) + p ESI Full ms [100.00-1000.00]

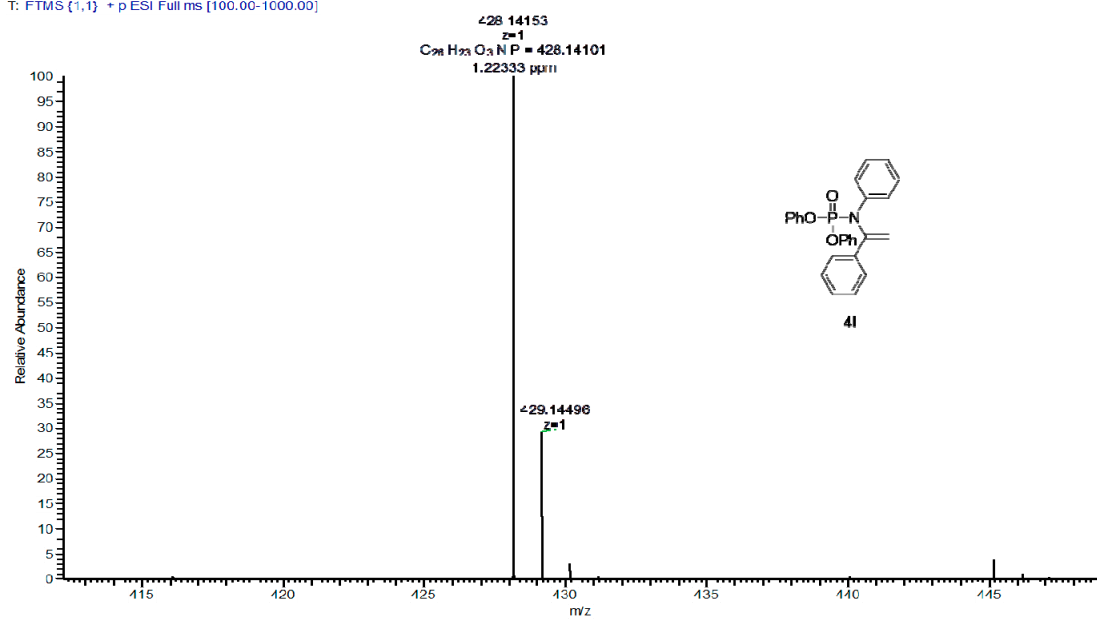

1183 #43 RT: 0.63 AV: 1 SB: 6 0.00-0.08 NL: 1.06E6  
T: FTMS (1,1) + p ESI Full ms [100.00-1000.00]

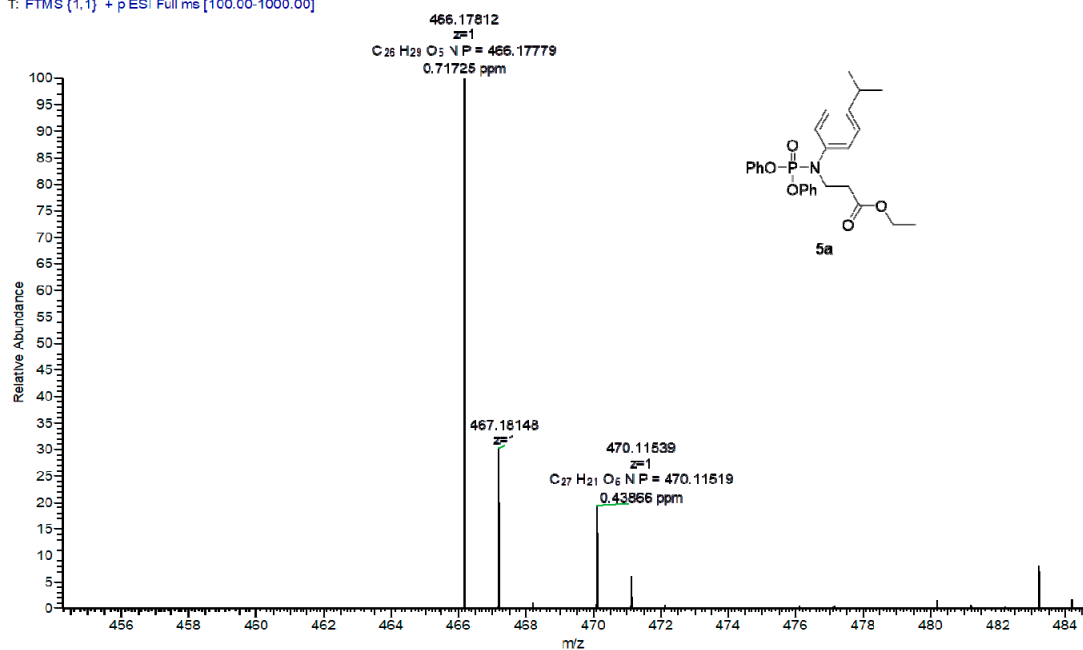

1187 #13 RT: 0.20 AV: 1 SB: 6 0.01 0.09 NL: 6.76E5  
T: FTMS (1,1) + p ESI Full ms [100.00-1000.00]

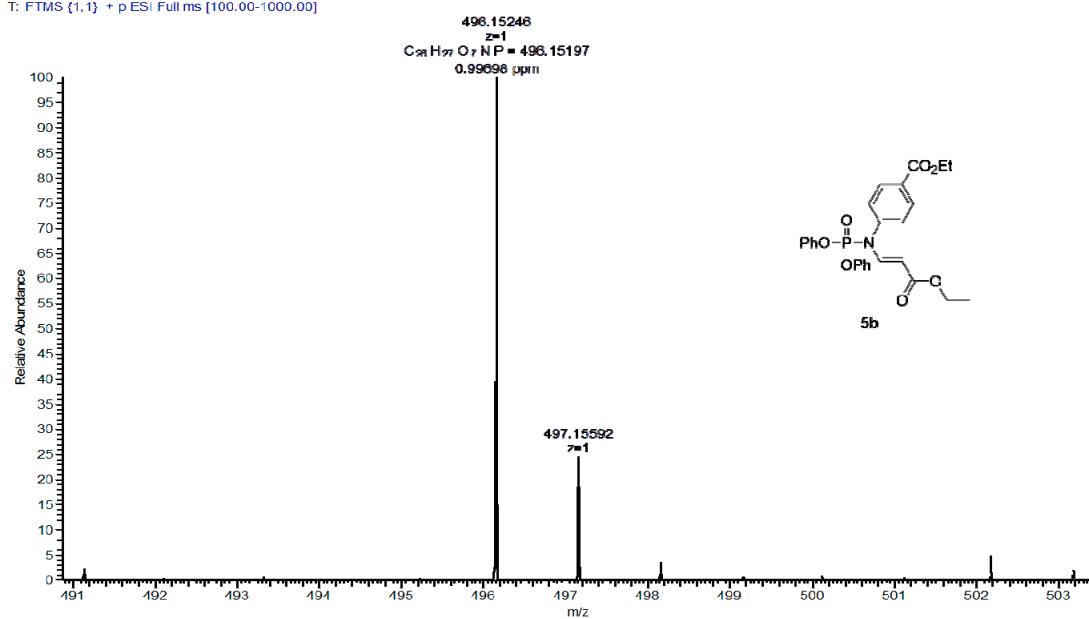

1205 #11 RT: 0.17 AV: 1 SB: 6 0.01-0.09 NL: 3.20E4  
T: FTMS (1,1) + p ESI Full ms [100.00-1000.00]

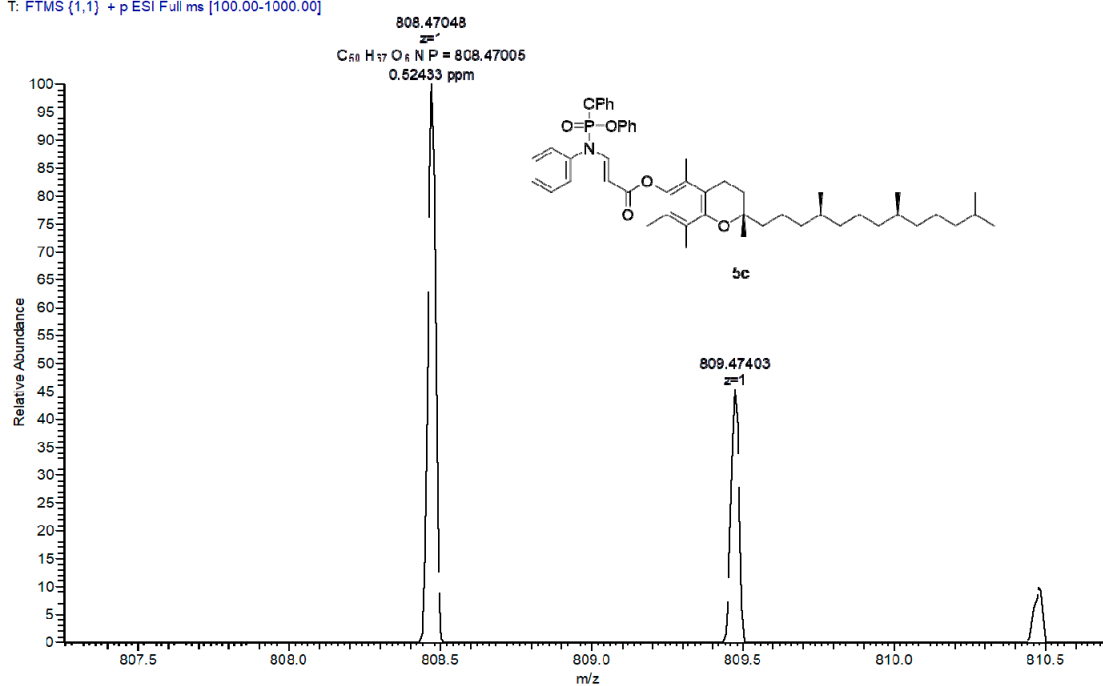

Supplement: s1 [file s1]
